# Supplementary material for: Histone Demethylase JMJD2B Functions as a Co-Factor of Estrogen Receptor in Breast Cancer Proliferation and Mammary Gland Development
Source: PLoS One. 2011 Mar 18;6(3):e17830. doi: 10.1371/journal.pone.0017830 (PMC3060874; doi:10.1371/journal.pone.0017830)
Supplement: Table S3 — Genes upregulated in JMJD2B depleted cells. (XLS) [file pone.0017830.s010.xls]

## Sheet: 2Bup_2_005
Suppl Table S3
Column #	Column ID	gene_assignment	Gene Symbol	RefSeq	p-value(group)	p-value(CE vs. CB)	Ratio(CE vs. CB)	Fold-Change(CE vs. CB)	Fold-Change(CE vs. CB) (Description)	p-value(CE vs. KE)	Ratio(CE vs. KE)	Fold-Change(CE vs. KE)	Fold-Change(CE vs. KE) (Description)	F(group)	SS(group)	SS(Error)	F(Error)
129	7892623	---		---	5.55646e-07	0.0221708	1.18641	1.18641	CE up vs CB	9.00869e-07	2.25207	2.25207	CE up vs KE	119.397	4.08146	0.091157	1
352	7892846	---		---	4.71602e-10	0.901214	1.00351	1.00351	CE up vs CB	7.58306e-10	2.47096	2.47096	CE up vs KE	713.787	4.9952	0.0186618	1
843	7893339	---		---	1.054e-07	0.00341832	1.20521	1.20521	CE up vs CB	2.04531e-07	2.09621	2.09621	CE up vs KE	182.432	3.53429	0.0516617	1
928	7893424	---		---	1.33485e-06	0.374882	0.927633	-1.07801	CE down vs CB	2.13189e-06	2.6117	2.6117	CE up vs KE	95.3253	5.70573	0.159614	1
1151	7893647	---		---	3.23147e-08	0.773589	0.985887	-1.01431	CE down vs CB	4.98263e-08	2.53706	2.53706	CE up vs KE	246.177	5.25918	0.0569692	1
1318	7893815	---		---	1.74496e-08	0.241523	0.942194	-1.06135	CE down vs CB	4.20341e-08	2.5543	2.5543	CE up vs KE	287.667	5.97106	0.0553517	1
1584	7894083	---		---	5.14524e-10	0.0249845	0.917679	-1.08971	CE down vs CB	1.74166e-09	2.53554	2.53554	CE up vs KE	698.348	6.37411	0.0243398	1
3040	7895551	---		---	3.4744e-06	0.875453	0.98799	-1.01216	CE down vs CB	6.1244e-06	2.18131	2.18131	CE up vs KE	74.4237	3.8861	0.139243	1
3146	7895657	---		---	1.64386e-07	0.163425	0.910398	-1.09842	CE down vs CB	5.01983e-07	2.42724	2.42724	CE up vs KE	162.939	5.71041	0.093457	1
3431	7895945	---		---	0.000163351	0.595457	1.09273	1.09273	CE up vs CB	0.000261517	2.69999	2.69999	CE up vs KE	26.5985	6.40889	0.642531	1
3622	7896138	---		---	3.97763e-05	0.275761	0.799945	-1.25009	CE down vs CB	0.00014747	3.61445	3.61445	CE up vs KE	39.1155	13.3396	0.909416	1
3914	7896431	---		---	0.000735122	0.17665	1.19296	1.19296	CE up vs CB	0.000370172	2.01384	2.01384	CE up vs KE	17.333	2.30139	0.354067	1
3921	7896438	---		---	1.38785e-06	0.691765	0.960687	-1.04092	CE down vs CB	1.78995e-06	3.31559	3.31559	CE up vs KE	94.3734	8.41165	0.237684	1
4672	7897255	NM_003636 // KCNAB2 /// NM_172130 // KCNAB2 /// ENST00000378097 // KCNAB2 /// EN	KCNAB2	NM_003636	2.14723e-05	0.337381	0.878052	-1.13888	CE down vs CB	3.23917e-05	2.8938	2.8938	CE up vs KE	46.125	7.01669	0.405662	1
5426	7898088	NM_015209 // RP1-21O18.1 /// NM_201628 // RP1-21O18.1 /// ENST00000376030 // RP1	RP1-21O18.1	NM_015209	0.00317484	0.00163688	2.23957	2.23957	CE up vs CB	0.00329939	2.04525	2.04525	CE up vs KE	11.1106	3.1238	0.749748	1
6196	7898952	NM_020448 // NIPAL3 /// ENST00000374399 // NIPAL3 /// BC063583 // NIPAL3 /// BX5	NIPAL3	NM_020448	5.48589e-05	0.0661188	0.741995	-1.34772	CE down vs CB	0.000256666	2.39	2.39	CE up vs KE	35.8668	6.61341	0.491701	1
6254	7899017	NM_003002 // SDHD /// ENST00000375549 // SDHD /// CR456932 // SDHD	SDHD	NM_003002	1.00405e-07	0.98259	1.00133	1.00133	CE up vs CB	1.87603e-07	2.64867	2.64867	CE up vs KE	184.696	6.06147	0.0875162	1
6279	7899046	NM_020451 // SEPN1 /// NM_206926 // SEPN1 /// ENST00000361547 // SEPN1 /// ENST0	SEPN1	NM_020451	1.73293e-06	0.594563	0.954622	-1.04754	CE down vs CB	4.59527e-06	2.48257	2.48257	CE up vs KE	89.1183	5.86024	0.175355	1
6378	7899158	NM_031286 // SH3BGRL3 /// ENST00000270792 // SH3BGRL3 /// BC030135 // SH3BGRL3 /	SH3BGRL3	NM_031286	1.46356e-07	0.171525	0.91127	-1.09737	CE down vs CB	2.24359e-07	2.70445	2.70445	CE up vs KE	167.827	6.01621	0.095594	1
6957	7899806	NM_001040441 // ZBTB8A /// ENST00000316459 // ZBTB8A /// BC015239 // ZBTB8A ///	ZBTB8A	NM_001040441	0.00106638	0.580021	1.08132	1.08132	CE up vs CB	0.000530077	2.12723	2.12723	CE up vs KE	15.5298	2.67373	0.459114	1
7621	7900545	NM_173642 // RIMKLA /// ENST00000431473 // RIMKLA /// BC039737 // RIMKLA /// ENS	RIMKLA	NM_173642	0.000385835	0.227636	0.823899	-1.21374	CE down vs CB	0.000535018	2.27997	2.27997	CE up vs KE	20.8829	4.29848	0.5489	1
8205	7901181	NM_005727 // TSPAN1 /// ENST00000372003 // TSPAN1 /// ENST00000236130 // TSPAN1	TSPAN1	NM_005727	1.50044e-05	0.0113451	0.727393	-1.37477	CE down vs CB	7.46142e-05	2.05912	2.05912	CE up vs KE	50.7251	4.49943	0.236539	1
8752	7901799	NM_001134673 // NFIA /// NM_001145511 // NFIA /// NM_001145512 // NFIA /// ENST0	NFIA	NM_001134673	0.00116848	0.181959	1.40298	1.40298	CE up vs CB	0.00430002	2.49062	2.49062	CE up vs KE	15.1116	7.59495	1.34024	1
8899	7901962	NM_002633 // PGM1 /// ENST00000371084 // PGM1 /// BC019920 // PGM1 /// ENST00000	PGM1	NM_002633	0.00135603	0.791814	1.05321	1.05321	CE up vs CB	0.000593352	2.82717	2.82717	CE up vs KE	14.4508	4.88307	0.901093	1
8938	7902005	NM_020925 // CACHD1 /// ENST00000290039 // CACHD1 /// BC039301 // CACHD1 /// ENS	CACHD1	NM_020925	0.00029617	0.0836705	0.533383	-1.87482	CE down vs CB	0.000365142	6.5194	6.5194	CE up vs KE	22.5129	21.3506	2.529	1
9461	7902581	NM_012302 // LPHN2 /// ENST00000359929 // LPHN2 /// ENST00000319517 // LPHN2 ///	LPHN2	NM_012302	0.00245239	0.0237984	1.51859	1.51859	CE up vs CB	0.000422021	2.37547	2.37547	CE up vs KE	12.0507	2.54278	0.562686	1
9991	7903170	NM_152487 // TMEM56 /// ENST00000370203 // TMEM56	TMEM56	NM_152487	5.19775e-06	0.357152	0.858009	-1.16549	CE down vs CB	1.14534e-05	4.50654	4.50654	CE up vs KE	67.0123	15.4187	0.613565	1
10024	7903209	NM_015976 // SNX7 /// NM_152238 // SNX7 /// ENST00000370189 // SNX7 /// ENST0000	SNX7	NM_015976	1.40953e-05	0.320839	0.902026	-1.10862	CE down vs CB	5.32591e-05	2.13446	2.13446	CE up vs KE	51.5704	4.58554	0.237115	1
10391	7903613	NM_020775 // KIAA1324 /// ENST00000234923 // KIAA1324 /// ENST00000369938 // KIA	KIAA1324	NM_020775	0.00103989	0.819875	0.967907	-1.03316	CE down vs CB	0.000932248	2.02723	2.02723	CE up vs KE	15.6465	2.81599	0.479934	1
10734	7903992	NM_001010935 // RAP1A /// NM_002884 // RAP1A /// ENST00000356415 // RAP1A /// EN	RAP1A	NM_001010935	4.8506e-05	0.0497973	1.35897	1.35897	CE up vs CB	0.000103542	2.56333	2.56333	CE up vs KE	37.0798	6.13074	0.440904	1
10772	7904035	AK307185 // WNT2B	WNT2B	AK307185	1.64588e-05	0.000129858	0.259776	-3.84948	CE down vs CB	0.000736597	2.82866	2.82866	CE up vs KE	49.498	17.907	0.964727	1
10842	7904113	NM_001142782 // MAGI3 /// NM_152900 // MAGI3 /// ENST00000369611 // MAGI3 /// EN	MAGI3	NM_001142782	0.000281489	0.0211923	0.542953	-1.84178	CE down vs CB	0.00121644	2.83955	2.83955	CE up vs KE	22.8387	9.76308	1.13994	1
10945	7904225	NM_138959 // VANGL1 /// ENST00000355485 // VANGL1	VANGL1	NM_138959	0.000100331	0.310239	0.885579	-1.1292	CE down vs CB	0.000126145	2.16525	2.16525	CE up vs KE	30.4285	3.58583	0.314252	1
11013	7904302	NM_020440 // PTGFRN /// ENST00000393203 // PTGFRN /// BC152454 // PTGFRN	PTGFRN	NM_020440	1.2685e-06	0.0344083	1.26736	1.26736	CE up vs CB	1.97312e-06	3.09299	3.09299	CE up vs KE	96.5859	7.83705	0.216375	1
11367	7904845	NM_002614 // PDZK1 /// ENST00000417171 // PDZK1 /// ENST00000344770 // PDZK1 ///	PDZK1	NM_002614	6.31158e-05	3.65515e-05	9.04917	9.04917	CE up vs CB	0.0166023	2.24972	2.24972	CE up vs KE	34.5297	23.3378	1.80234	1
11369	7904847	NR_003377 // PDZK1P1 /// NM_002614 // PDZK1 /// ENST00000417171 // PDZK1 /// ENS	PDZK1P1	NR_003377	5.73515e-05	6.64346e-05	11.708	11.708	CE up vs CB	0.0219464	2.52148	2.52148	CE up vs KE	35.438	35.2983	2.65616	1
11854	7905425	NM_020770 // CGN /// ENST00000271636 // CGN /// AF263462 // CGN	CGN	NM_020770	0.00276238	0.947734	0.988263	-1.01188	CE down vs CB	0.00112531	2.37144	2.37144	CE up vs KE	11.6098	3.31318	0.76101	1
13134	7906872	NM_003115 // UAP1 /// ENST00000367926 // UAP1 /// S73498 // UAP1 /// AB011004 //	UAP1	NM_003115	1.71502e-05	0.0551282	1.22538	1.22538	CE up vs CB	1.56391e-05	2.30341	2.30341	CE up vs KE	48.9612	3.76408	0.20501	1
13248	7907006	NM_012474 // UCK2 /// ENST00000367879 // UCK2 /// BC002906 // UCK2 /// ENST00000	UCK2	NM_012474	8.551e-05	0.010283	1.5064	1.5064	CE up vs CB	0.000226695	2.17417	2.17417	CE up vs KE	31.7895	4.48971	0.37662	1
13516	7907303	NM_002022 // FMO4 /// ENST00000367749 // FMO4 /// BC002780 // FMO4	FMO4	NM_002022	0.00210728	0.59863	0.867789	-1.15235	CE down vs CB	0.00116577	3.57082	3.57082	CE up vs KE	12.6317	7.92179	1.67236	1
14218	7908070	NM_002293 // LAMC1 /// ENST00000258341 // LAMC1 /// J03202 // LAMC1	LAMC1	NM_002293	1.59097e-05	0.0451004	0.801485	-1.24768	CE down vs CB	2.43998e-05	2.24492	2.24492	CE up vs KE	49.9448	4.07113	0.217367	1
14285	7908140	NM_015149 // RGL1 /// ENST00000304685 // RGL1 /// ENST00000367531 // RGL1 /// AF	RGL1	NM_015149	0.00216993	0.00284888	3.1405	3.1405	CE up vs CB	0.00863377	2.54238	2.54238	CE up vs KE	12.5178	8.5527	1.82199	1
14442	7908309	NM_031935 // HMCN1 /// ENST00000271588 // HMCN1 /// AF156100 // HMCN1 /// ENST00	HMCN1	NM_031935	0.00213888	0.371328	1.19468	1.19468	CE up vs CB	0.000473734	2.8973	2.8973	CE up vs KE	12.5737	4.15429	0.881053	1
14851	7908761	NM_198149 // SHISA4 /// ENST00000362011 // SHISA4 /// BC111855 // SHISA4	SHISA4	NM_198149	5.33577e-05	0.906577	0.981508	-1.01884	CE down vs CB	4.07771e-05	3.47135	3.47135	CE up vs KE	36.137	8.03706	0.59308	1
14897	7908815	NM_004767 // GPR37L1 /// ENST00000367282 // GPR37L1 /// BC050334 // GPR37L1	GPR37L1	NM_004767	1.50061e-07	0.359273	1.04597	1.04597	CE up vs CB	2.96361e-07	2.04858	2.04858	CE up vs KE	166.763	3.33663	0.0533553	1
15235	7909185	NM_015326 // SRGAP2 /// NM_001042758 // SRGAP2 /// ENST00000419187 // SRGAP2 ///	SRGAP2	NM_015326	2.0191e-05	0.043999	0.776694	-1.28751	CE down vs CB	3.4848e-05	2.39528	2.39528	CE up vs KE	46.8857	4.91821	0.279728	1
15245	7909196	NM_014002 // IKBKE /// ENST00000367120 // IKBKE /// BC105923 // IKBKE	IKBKE	NM_014002	0.00135248	0.849491	0.933255	-1.07152	CE down vs CB	0.000512089	7.18827	7.18827	CE up vs KE	14.4622	16.8233	3.10203	1
15292	7909246	NM_004759 // MAPKAPK2 /// ENST00000294981 // MAPKAPK2	MAPKAPK2	NM_004759	0.000150564	0.0418525	1.37259	1.37259	CE up vs CB	0.000110651	2.50532	2.50532	CE up vs KE	27.207	4.36427	0.42776	1
15308	7909264	NM_018724 // IL20 /// ENST00000367098 // IL20 /// ENST00000367096 // IL20 /// AY	IL20	NM_018724	6.36926e-08	1.04688e-07	18.9514	18.9514	CE up vs CB	2.8943e-05	4.07505	4.07505	CE up vs KE	207.308	53.4466	0.6875	1
15442	7909408	NM_002389 // CD46 /// NM_172359 // CD46 /// NM_172351 // CD46 /// NM_153826 // C	CD46	NM_002389	1.72273e-05	0.264548	0.904136	-1.10603	CE down vs CB	1.80278e-05	2.13569	2.13569	CE up vs KE	48.9031	3.23149	0.176212	1
15611	7909594	NM_006243 // PPP2R5A /// ENST00000261461 // PPP2R5A /// L42373 // PPP2R5A	PPP2R5A	NM_006243	0.00317443	0.490786	1.14322	1.14322	CE up vs CB	0.00237365	2.24884	2.24884	CE up vs KE	11.111	3.57554	0.858137	1
15660	7909650	BC028194 // VASH2	VASH2	BC028194	0.00281199	0.215151	0.770959	-1.29709	CE down vs CB	0.00275737	2.27818	2.27818	CE up vs KE	11.5449	4.03749	0.932584	1
18317	7912652	NM_001229 // CASP9 /// ENST00000333868 // CASP9 /// ENST00000375874 // CASP9 ///	CASP9	NM_001229	0.00106359	0.0312747	0.536832	-1.86278	CE down vs CB	0.00633403	2.39904	2.39904	CE up vs KE	15.5419	8.2881	1.42207	1
18393	7912736	NM_153213 // ARHGEF19 /// ENST00000270747 // ARHGEF19 /// BC040640 // ARHGEF19 /	ARHGEF19	NM_153213	0.00100821	0.0116249	1.7778	1.7778	CE up vs CB	0.000738064	2.5475	2.5475	CE up vs KE	15.7911	4.62319	0.780726	1
18544	7912914	NM_022089 // ATP13A2 /// NM_001141973 // ATP13A2 /// NM_001141974 // ATP13A2 ///	ATP13A2	NM_022089	0.000499438	0.0798389	1.37944	1.37944	CE up vs CB	0.000111363	3.07909	3.07909	CE up vs KE	19.3928	4.67319	0.6426	1
19224	7913638	NM_017707 // ASAP3 /// NM_001143778 // ASAP3 /// ENST00000437606 // ASAP3 /// EN	ASAP3	NM_017707	0.00114897	0.636997	1.11208	1.11208	CE up vs CB	0.000298218	3.72648	3.72648	CE up vs KE	15.1879	6.67432	1.17187	1
19633	7914097	NM_006990 // WASF2 /// ENST00000430629 // WASF2 /// ENST00000374019 // WASF2 ///	WASF2	NM_006990	0.00182096	0.232926	0.704304	-1.41984	CE down vs CB	0.0122619	2.39729	2.39729	CE up vs KE	13.2123	9.13104	1.84293	1
19682	7914155	ENST00000373871 // EYA3 /// ENST00000373864 // EYA3 /// BX648945 // EYA3	EYA3	ENST00000373871	0.0027143	0.0664573	1.3643	1.3643	CE up vs CB	0.00138835	2.01259	2.01259	CE up vs KE	11.674	2.33973	0.534461	1
19835	7914330	NM_024522 // NKAIN1 /// ENST00000263693 // NKAIN1 /// AK299507 // NKAIN1 /// ENS	NKAIN1	NM_024522	8.0947e-06	0.000366992	1.7849	1.7849	CE up vs CB	1.57353e-05	2.47336	2.47336	CE up vs KE	59.6785	5.41325	0.241885	1
20567	7915131	NM_006802 // SF3A3 /// ENST00000373019 // SF3A3 /// AK128438 // SF3A3	SF3A3	NM_006802	0.000147999	0.476261	1.12302	1.12302	CE up vs CB	0.00177901	2.03923	2.03923	CE up vs KE	27.3368	6.17132	0.602003	1
20780	7915374	NM_001031694 // SCMH1 /// NM_012236 // SCMH1 /// ENST00000326197 // SCMH1 /// EN	SCMH1	NM_001031694	0.000243261	0.840072	0.964805	-1.03648	CE down vs CB	0.00090714	2.41083	2.41083	CE up vs KE	23.7975	6.58392	0.73777	1
21004	7915629	NM_003738 // PTCH2 /// ENST00000372192 // PTCH2 /// AY359016 // PTCH2 /// ENST00	PTCH2	NM_003738	0.000887012	0.530647	0.858417	-1.16493	CE down vs CB	0.000713197	3.45134	3.45134	CE up vs KE	16.4016	8.33704	1.35548	1
21043	7915671	NM_024602 // HECTD3 /// ENST00000372172 // HECTD3 /// AK301124 // HECTD3 /// ENS	HECTD3	NM_024602	0.00109095	0.142122	1.28321	1.28321	CE up vs CB	0.000206433	2.66984	2.66984	CE up vs KE	15.4247	3.38847	0.585809	1
21059	7915688	NM_020883 // ZSWIM5 /// ENST00000359600 // ZSWIM5	ZSWIM5	NM_020883	0.000574597	0.232422	0.790519	-1.26499	CE down vs CB	0.000538618	2.74677	2.74677	CE up vs KE	18.6228	5.77358	0.826741	1
21384	7916046	NM_001981 // EPS15 /// NM_001159969 // EPS15 /// ENST00000371733 // EPS15 /// EN	EPS15	NM_001981	0.00171109	0.0199548	1.49521	1.49521	CE up vs CB	0.00056155	2.15113	2.15113	CE up vs KE	13.4663	2.4303	0.481262	1
22083	7916818	NM_015139 // SLC35D1 /// ENST00000235345 // SLC35D1 /// AK289800 // SLC35D1	SLC35D1	NM_015139	0.000287443	0.522395	0.903971	-1.10623	CE down vs CB	0.000282114	2.51991	2.51991	CE up vs KE	22.7041	4.84436	0.568986	1
22108	7916849	NM_018841 // GNG12 /// ENST00000370982 // GNG12 /// BC005940 // GNG12	GNG12	NM_018841	5.57521e-09	0.151999	1.05717	1.05717	CE up vs CB	4.95522e-09	2.50218	2.50218	CE up vs KE	383.592	4.42936	0.0307922	1
22462	7917241	NM_004388 // CTBS /// ENST00000370630 // CTBS /// BC024007 // CTBS	CTBS	NM_004388	0.000547892	0.728901	0.949644	-1.05303	CE down vs CB	0.00107397	2.04904	2.04904	CE up vs KE	18.8812	3.66356	0.51742	1
22521	7917305	NM_018298 // MCOLN3 /// ENST00000370589 // MCOLN3 /// ENST00000302814 // MCOLN3	MCOLN3	NM_018298	0.000588133	0.378951	1.14151	1.14151	CE up vs CB	0.00036637	2.3092	2.3092	CE up vs KE	18.4974	3.49925	0.504467	1
23101	7917955	NM_001013660 // FRRS1 /// ENST00000287474 // FRRS1 /// ENST00000370176 // FRRS1	FRRS1	NM_001013660	0.000169442	0.0570821	0.645253	-1.54978	CE down vs CB	0.00330785	2.25743	2.25743	CE up vs KE	26.3292	9.59457	0.971754	1
23682	7918591	NM_017744 // ST7L /// NM_138727 // ST7L /// NM_138728 // ST7L /// NM_138729 // S	ST7L	NM_017744	0.00107047	0.486238	0.811908	-1.23167	CE down vs CB	0.000638767	4.68394	4.68394	CE up vs KE	15.5121	11.8385	2.03514	1
23716	7918629	NM_003051 // SLC16A1 /// ENST00000369626 // SLC16A1 /// L31801 // SLC16A1 /// BC	SLC16A1	NM_003051	0.00220879	0.0453486	1.51686	1.51686	CE up vs CB	0.00412293	2.01018	2.01018	CE up vs KE	12.4491	3.60794	0.772839	1
23730	7918644	NM_006608 // PHTF1 /// ENST00000393357 // PHTF1 /// ENST00000369604 // PHTF1 ///	PHTF1	NM_006608	0.00124085	0.622176	1.08596	1.08596	CE up vs CB	0.00179485	2.09068	2.09068	CE up vs KE	14.8419	3.59962	0.646751	1
25460	7920721	NM_006589 // FAM189B /// ENST00000361361 // FAM189B /// BC006493 // FAM189B ///	FAM189B	NM_006589	0.000386237	0.988725	0.997774	-1.00223	CE down vs CB	0.000278474	2.55448	2.55448	CE up vs KE	20.8767	4.56909	0.583629	1
26158	7921490	NM_003564 // TAGLN2 /// ENST00000368097 // TAGLN2 /// ENST00000320307 // TAGLN2	TAGLN2	NM_003564	0.00102236	0.715061	0.944632	-1.05861	CE down vs CB	0.000668886	2.24505	2.24505	CE up vs KE	15.7258	3.33952	0.566291	1
26180	7921513	NM_001135050 // IGSF9 /// NM_020789 // IGSF9 /// ENST00000361509 // IGSF9 /// EN	IGSF9	NM_001135050	0.0030833	0.683949	0.922663	-1.08382	CE down vs CB	0.00285794	2.24164	2.24164	CE up vs KE	11.2141	3.81635	0.907515	1
26903	7922311	NM_003762 // VAMP4 /// ENST00000236192 // VAMP4 /// uc001ghx.1 // VAMP4 /// uc00	VAMP4	NM_003762	0.0015384	0.439051	1.16524	1.16524	CE up vs CB	0.0016259	2.3988	2.3988	CE up vs KE	13.9095	4.59518	0.880965	1
27068	7922509	NM_022457 // RFWD2 /// NM_001001740 // RFWD2 /// ENST00000367669 // RFWD2 /// EN	RFWD2	NM_022457	0.000433009	0.160404	0.809241	-1.23573	CE down vs CB	0.000890105	2.01887	2.01887	CE up vs KE	20.205	3.54164	0.467426	1
27975	7923511	NM_015999 // ADIPOR1 /// NM_001127687 // ADIPOR1 /// ENST00000436244 // ADIPOR1	ADIPOR1	NM_015999	2.65007e-06	0.626917	0.969941	-1.03099	CE down vs CB	2.74765e-06	2.01665	2.01665	CE up vs KE	79.8434	2.72737	0.0910906	1
28052	7923599	NM_018208 // ETNK2 /// ENST00000367202 // ETNK2 /// BC010082 // ETNK2 /// AK2934	ETNK2	NM_018208	1.43816e-07	0.648929	1.0441	1.0441	CE up vs CB	1.18907e-06	3.26402	3.26402	CE up vs KE	168.576	13.1518	0.208045	1
28081	7923631	NM_198447 // GOLT1A /// ENST00000308302 // GOLT1A /// BC058832 // GOLT1A	GOLT1A	NM_198447	0.000126643	0.271649	0.845564	-1.18264	CE down vs CB	0.000464919	2.24128	2.24128	CE up vs KE	28.5403	5.39638	0.504212	1
28257	7923825	NM_173854 // SLC41A1 /// ENST00000367137 // SLC41A1 /// BC136303 // SLC41A1	SLC41A1	NM_173854	1.22087e-06	0.275087	0.91426	-1.09378	CE down vs CB	2.47039e-06	2.46266	2.46266	CE up vs KE	97.5427	5.34869	0.146225	1
28483	7924075	NM_172362 // KCNH1 /// NM_002238 // KCNH1 /// ENST00000367007 // KCNH1 /// ENST0	KCNH1	NM_172362	0.000612513	0.00125313	3.30456	3.30456	CE up vs CB	0.0169131	2.09404	2.09404	CE up vs KE	18.2806	10.3499	1.50978	1
29094	7924749	NM_001618 // PARP1 /// ENST00000366794 // PARP1 /// BC037545 // PARP1 /// M18112	PARP1	NM_001618	2.95617e-06	0.829361	0.981083	-1.01928	CE down vs CB	1.7109e-05	2.1821	2.1821	CE up vs KE	77.6118	5.34671	0.183708	1
29524	7925230	NM_152490 // B3GALNT2 /// ENST00000366600 // B3GALNT2 /// BC029564 // B3GALNT2 /	B3GALNT2	NM_152490	0.00173601	0.182269	1.27626	1.27626	CE up vs CB	0.000996729	2.32199	2.32199	CE up vs KE	13.4069	3.50276	0.696708	1
29541	7925252	NM_001098722 // GNG4 /// NM_001098721 // GNG4 /// NM_004485 // GNG4 /// ENST0000	GNG4	NM_001098722	0.00191119	0.0764263	1.71774	1.71774	CE up vs CB	0.000376063	4.76093	4.76093	CE up vs KE	13.0177	8.62904	1.76765	1
29697	7925415	AF333388 // MT1P2	MT1P2	AF333388	2.7418e-05	0.833985	0.974442	-1.02623	CE down vs CB	3.58378e-05	2.67255	2.67255	CE up vs KE	43.216	5.78603	0.35703	1
30337	7926155	NM_024693 // ECHDC3 /// ENST00000379215 // ECHDC3 /// AF275677 // ECHDC3 /// ENS	ECHDC3	NM_024693	0.000224567	0.0022897	1.62856	1.62856	CE up vs CB	0.000143545	2.11587	2.11587	CE up vs KE	24.3378	2.80175	0.306985	1
30372	7926194	NR_024577 // SEC61A2 /// NR_024576 // SEC61A2 /// NM_018144 // SEC61A2 /// NM_00	SEC61A2	NR_024577	0.00276638	0.842625	0.969478	-1.03148	CE down vs CB	0.00121019	2.09375	2.09375	CE up vs KE	11.6045	2.48285	0.570549	1
30403	7926228	NM_020397 // CAMK1D /// NM_153498 // CAMK1D /// ENST00000378847 // CAMK1D /// EN	CAMK1D	NM_020397	0.000581104	0.281531	0.86099	-1.16145	CE down vs CB	0.000537527	2.05461	2.05461	CE up vs KE	18.5621	2.92092	0.419625	1
30806	7926669	NM_012228 // MSRB2 /// ENST00000376510 // MSRB2	MSRB2	NM_012228	0.000946908	0.850375	1.03696	1.03696	CE up vs CB	0.000674939	2.71579	2.71579	CE up vs KE	16.0877	5.22858	0.86668	1
32027	7928042	NM_000188 // HK1 /// NM_033496 // HK1 /// NM_033497 // HK1 /// NM_033498 // HK1	HK1	NM_000188	8.33404e-07	0.10659	0.891242	-1.12203	CE down vs CB	6.52579e-07	2.42903	2.42903	CE up vs KE	107.606	4.04293	0.100191	1
32053	7928076	NM_005203 // COL13A1 /// NM_080806 // COL13A1 /// NM_080807 // COL13A1 /// NM_08	COL13A1	NM_005203	0.00343083	0.00532687	2.88529	2.88529	CE up vs CB	0.00292133	3.25463	3.25463	CE up vs KE	10.8398	7.94446	1.95439	1
32408	7928462	NM_014000 // VCL /// NM_003373 // VCL /// ENST00000372755 // VCL /// ENST0000021	VCL	NM_014000	0.000128548	0.157512	1.16094	1.16094	CE up vs CB	6.66369e-05	2.05782	2.05782	CE up vs KE	28.423	2.43784	0.22872	1
34240	7930515	NM_016234 // ACSL5 /// NM_203379 // ACSL5 /// NM_203380 // ACSL5 /// ENST0000035	ACSL5	NM_016234	0.00155135	0.242968	1.41512	1.41512	CE up vs CB	0.00180145	3.53084	3.53084	CE up vs KE	13.8742	9.85809	1.89476	1
34775	7931102	NM_002775 // HTRA1 /// ENST00000368984 // HTRA1 /// D87258 // HTRA1 /// ENST0000	HTRA1	NM_002775	0.000164832	0.175819	0.712915	-1.40269	CE down vs CB	0.000614467	3.45571	3.45571	CE up vs KE	26.5319	12.9022	1.29678	1
35471	7931869	NM_024701 // ASB13 /// ENST00000357700 // ASB13 /// BC012056 // ASB13 /// ENST00	ASB13	NM_024701	6.98591e-05	0.00193773	2.88641	2.88641	CE up vs CB	0.0124355	2.12096	2.12096	CE up vs KE	33.5905	17.2668	1.37077	1
35606	7932016	NR_024256 // FLJ45983 /// BC036297 // FLJ45983	FLJ45983	NR_024256	1.92834e-06	0.00199628	0.720131	-1.38864	CE down vs CB	6.70881e-06	2.1224	2.1224	CE up vs KE	86.6918	4.31809	0.132826	1
36763	7933322	NM_001040084 // ANXA8 /// NM_001098845 // ANXA8L1 /// NM_001630 // ANXA8L2 /// E	ANXA8	NM_001040084	0.00126859	0.0390484	1.60197	1.60197	CE up vs CB	0.000178652	3.49831	3.49831	CE up vs KE	14.7436	5.04908	0.913222	1
37226	7933835	NM_014836 // RHOBTB1 /// NR_024554 // RHOBTB1 /// NR_024555 // RHOBTB1 /// NR_02	RHOBTB1	NM_014836	0.00199772	0.00134293	5.35235	5.35235	CE up vs CB	0.0672349	2.09262	2.09262	CE up vs KE	12.8416	14.646	3.04137	1
37239	7933850	NM_178505 // TMEM26 /// ENST00000399298 // TMEM26 /// ENST00000277749 // TMEM26	TMEM26	NM_178505	0.00109609	0.0133645	1.94713	1.94713	CE up vs CB	0.000678391	3.09426	3.09426	CE up vs KE	15.4031	6.40905	1.10957	1
37317	7933935	NM_021800 // DNAJC12 /// ENST00000225171 // DNAJC12 /// AF176012 // DNAJC12	DNAJC12	NM_021800	0.00138882	0.379102	1.20535	1.20535	CE up vs CB	0.000582774	3.00641	3.00641	CE up vs KE	14.347	5.40833	1.00524	1
37898	7934584	NM_001014797 // KCNMA1 /// NM_002247 // KCNMA1 /// NM_001161352 // KCNMA1 /// NM	KCNMA1	NM_001014797	0.000101985	0.290135	0.845936	-1.18212	CE down vs CB	6.33482e-05	3.07046	3.07046	CE up vs KE	30.2924	6.19009	0.544919	1
38264	7934998	NM_005398 // PPP1R3C /// ENST00000238994 // PPP1R3C /// BX537399 // PPP1R3C ///	PPP1R3C	NM_005398	0.000328092	0.378473	0.891674	-1.12149	CE down vs CB	0.000368062	2.06208	2.06208	CE up vs KE	21.8692	3.09805	0.377767	1
38429	7935179	NM_000770 // CYP2C8 /// ENST00000371270 // CYP2C8 /// BC020596 // CYP2C8	CYP2C8	NM_000770	0.000833577	0.272197	0.762141	-1.31209	CE down vs CB	0.000633054	3.48263	3.48263	CE up vs KE	16.7049	8.30174	1.32524	1
38648	7935412	NM_032900 // ARHGAP19 /// ENST00000358531 // ARHGAP19 /// BC114490 // ARHGAP19 /	ARHGAP19	NM_032900	0.00197763	0.799516	1.06017	1.06017	CE up vs CB	0.000597903	3.37429	3.37429	CE up vs KE	12.8816	5.97495	1.2369	1
39271	7936092	NM_032747 // USMG5 /// ENST00000369825 // USMG5 /// ENST00000309579 // USMG5 ///	USMG5	NM_032747	8.76521e-08	0.892554	1.00668	1.00668	CE up vs CB	1.47489e-07	2.24942	2.24942	CE up vs KE	191.177	4.0859	0.0569928	1
39597	7936441	NM_001001936 // AFAP1L2 /// NM_032550 // AFAP1L2 /// ENST00000304129 // AFAP1L2	AFAP1L2	NM_001001936	0.00174344	0.0166592	1.64572	1.64572	CE up vs CB	0.000241079	2.81581	2.81581	CE up vs KE	13.3894	3.42147	0.681428	1
39632	7936478	NM_002313 // ABLIM1 /// NM_001003407 // ABLIM1 /// NM_001003408 // ABLIM1 /// NM	ABLIM1	NM_002313	0.000142059	0.065137	0.742037	-1.34764	CE down vs CB	0.000199105	2.46016	2.46016	CE up vs KE	27.6486	5.05042	0.487105	1
39657	7936505	NM_005264 // GFRA1 /// NM_145793 // GFRA1 /// NM_001145453 // GFRA1 /// ENST0000	GFRA1	NM_005264	4.11914e-07	0.046154	1.1521	1.1521	CE up vs CB	3.70158e-07	2.47354	2.47354	CE up vs KE	128.903	4.35569	0.0901082	1
39664	7936513	BC021737 // C10orf82 /// AK097587 // C10orf82 /// BX537582 // C10orf82 /// ENST0	C10orf82	BC021737	0.000132772	0.143027	0.73072	-1.36851	CE down vs CB	0.000175353	3.55577	3.55577	CE up vs KE	28.1704	9.84622	0.932064	1
40916	7937897	NR_027017 // PGAP2 /// NR_027018 // PGAP2 /// NR_027014 // PGAP2 /// NR_027015 /	PGAP2	NR_027017	0.00169658	0.887307	0.979576	-1.02085	CE down vs CB	0.000646361	2.14173	2.14173	CE up vs KE	13.5013	2.51588	0.496915	1
41667	7938782	NM_005566 // LDHA /// NM_001135239 // LDHA /// ENST00000430553 // LDHA /// ENST0	LDHA	NM_005566	1.73633e-09	0.447369	1.04266	1.04266	CE up vs CB	7.86891e-09	3.62585	3.62585	CE up vs KE	514.477	13.1708	0.0682675	1
42579	7939782	NM_130470 // MADD /// NM_003682 // MADD /// NM_130473 // MADD /// NM_130475 // M	MADD	NM_130470	0.00122909	0.123321	0.770903	-1.29718	CE down vs CB	0.0014834	2.04327	2.04327	CE up vs KE	14.8843	3.18187	0.570062	1
43131	7940455	NM_015533 // DAK /// ENST00000394900 // DAK /// ENST00000311463 // DAK /// BC001	DAK	NM_015533	0.000513952	0.113526	0.773135	-1.29343	CE down vs CB	0.00103556	2.06686	2.06686	CE up vs KE	19.2333	3.77822	0.523845	1
43188	7940518	NM_006133 // DAGLA /// ENST00000257215 // DAGLA /// BC150176 // DAGLA	DAGLA	NM_006133	5.42075e-05	0.16973	1.32791	1.32791	CE up vs CB	2.37479e-05	5.13048	5.13048	CE up vs KE	35.9829	11.9042	0.882212	1
43307	7940649	NM_001083926 // ASRGL1 /// NM_025080 // ASRGL1 /// ENST00000301776 // ASRGL1 ///	ASRGL1	NM_001083926	0.000440348	0.645135	1.07613	1.07613	CE up vs CB	0.00165992	2.03808	2.03808	CE up vs KE	20.1079	4.42915	0.587385	1
43518	7940889	NM_032344 // NUDT22 /// NM_001128612 // NUDT22 /// NM_001128613 // NUDT22 /// EN	NUDT22	NM_032344	0.00137087	0.457461	0.883863	-1.1314	CE down vs CB	0.00213326	2.02188	2.02188	CE up vs KE	14.4034	3.37343	0.624561	1
44306	7941754	NM_177963 // SYT12 /// ENST00000393946 // SYT12 /// AK024280 // SYT12	SYT12	NM_177963	1.86686e-07	0.0108967	1.24433	1.24433	CE up vs CB	1.35168e-06	2.32789	2.32789	CE up vs KE	157.746	6.49235	0.109752	1
44950	7942458	NM_021200 // PLEKHB1 /// NM_001130034 // PLEKHB1 /// NM_001130033 // PLEKHB1 ///	PLEKHB1	NM_021200	2.50857e-07	0.000961444	0.73678	-1.35726	CE down vs CB	2.90512e-06	2.00225	2.00225	CE up vs KE	146.305	4.96845	0.0905586	1
45048	7942568	NM_006656 // NEU3 /// ENST00000294064 // NEU3 /// Y18563 // NEU3	NEU3	NM_006656	0.000253664	0.000406695	1.73508	1.73508	CE up vs CB	6.32448e-05	2.05889	2.05889	CE up vs KE	23.5189	1.99069	0.225713	1
45249	7942795	NM_003251 // THRSP /// ENST00000281030 // THRSP /// BC031989 // THRSP	THRSP	NM_003251	0.00127664	0.00206118	1.66853	1.66853	CE up vs CB	0.000282951	2.01322	2.01322	CE up vs KE	14.7157	1.80139	0.326436	1
46462	7944168	NM_019894 // TMPRSS4 /// NM_001083947 // TMPRSS4 /// ENST00000339018 // TMPRSS4	TMPRSS4	NM_019894	3.87668e-07	0.0044157	1.30012	1.30012	CE up vs CB	2.37355e-06	2.20934	2.20934	CE up vs KE	130.917	5.49557	0.11194	1
46613	7944330	NM_015157 // PHLDB1 /// NM_001144758 // PHLDB1 /// NM_001144759 // PHLDB1 /// EN	PHLDB1	NM_015157	0.00103275	0.96386	0.988678	-1.01145	CE down vs CB	0.00107524	3.36616	3.36616	CE up vs KE	15.6786	8.71235	1.48182	1
46939	7944691	NM_003105 // SORL1 /// ENST00000260197 // SORL1 /// BC137171 // SORL1	SORL1	NM_003105	0.00244137	0.0059626	2.60955	2.60955	CE up vs CB	0.00751913	2.50369	2.50369	CE up vs KE	12.0676	7.55798	1.67014	1
46995	7944753	NM_024806 // C11orf63 /// NM_199124 // C11orf63 /// ENST00000227349 // C11orf63	C11orf63	NM_024806	0.000894829	0.949466	1.00824	1.00824	CE up vs CB	0.000299119	2.14153	2.14153	CE up vs KE	16.3592	2.41139	0.393074	1
47507	7945335	NM_138342 // GLB1L2 /// ENST00000339772 // GLB1L2 /// ENST00000389881 // GLB1L2	GLB1L2	NM_138342	0.000980472	0.0538933	1.35533	1.35533	CE up vs CB	0.000142289	2.48792	2.48792	CE up vs KE	15.9224	2.70402	0.452866	1
48458	7946442	NM_020644 // TMEM9B /// ENST00000309134 // TMEM9B /// AY359069 // TMEM9B	TMEM9B	NM_020644	0.000964633	0.844688	0.974221	-1.02646	CE down vs CB	0.000484623	2.07193	2.07193	CE up vs KE	15.9995	2.49622	0.41605	1
48912	7946937	NM_012139 // SERGEF /// ENST00000265965 // SERGEF /// AK292286 // SERGEF	SERGEF	NM_012139	0.00112328	0.641458	0.922343	-1.08419	CE down vs CB	0.00218808	2.09727	2.09727	CE up vs KE	15.2908	3.99757	0.697163	1
48932	7946959	NM_138421 // SAAL1 /// ENST00000300013 // SAAL1 /// BC012010 // SAAL1	SAAL1	NM_138421	0.00179675	0.0469809	1.95497	1.95497	CE up vs CB	0.00738022	2.76729	2.76729	CE up vs KE	13.2666	10.1471	2.03962	1
49120	7947173	NM_178498 // SLC5A12 /// ENST00000396005 // SLC5A12 /// AY299482 // SLC5A12 ///	SLC5A12	NM_178498	0.002742	0.260587	0.798286	-1.25268	CE down vs CB	0.00230511	2.26526	2.26526	CE up vs KE	11.6368	3.77441	0.864936	1
49211	7947276	NM_001584 // MPPED2 /// ENST00000358117 // MPPED2 /// U57911 // MPPED2	MPPED2	NM_001584	2.29271e-07	1.8117e-07	7.26903	7.26903	CE up vs CB	0.00017892	2.19409	2.19409	CE up vs KE	149.7	20.1931	0.359707	1
50209	7948422	NM_001444 // FABP5 /// NR_002935 // FABP5L3 /// ENST00000297258 // FABP5 /// BC0	FABP5	NM_001444	7.53265e-06	7.89367e-05	1.80906	1.80906	CE up vs CB	8.40572e-06	2.23929	2.23929	CE up vs KE	60.8153	3.69214	0.161895	1
50384	7948614	NM_013402 // FADS1 /// AF084558 // FADS1 /// ENST00000350997 // FADS1	FADS1	NM_013402	1.96725e-09	0.99353	1.00034	1.00034	CE up vs CB	5.57576e-09	2.88465	2.88465	CE up vs KE	498.575	7.91374	0.0423272	1
50406	7948637	NM_021727 // FADS3 /// ENST00000278829 // FADS3 /// AF084560 // FADS3 /// ENST00	FADS3	NM_021727	1.47926e-05	0.197315	0.81236	-1.23098	CE down vs CB	1.38799e-05	3.98787	3.98787	CE up vs KE	50.9162	10.4159	0.545521	1
50504	7948745	NM_198334 // GANAB /// NM_198335 // GANAB /// ENST00000346178 // GANAB /// ENST0	GANAB	NM_198334	1.98975e-07	0.658978	0.975103	-1.02553	CE down vs CB	5.64949e-07	2.19355	2.19355	CE up vs KE	155.205	4.40085	0.0756133	1
51214	7949529	NM_198897 // FIBP /// NM_004214 // FIBP /// ENST00000338369 // FIBP /// ENST0000	FIBP	NM_198897	0.00100165	0.521426	0.899349	-1.11192	CE down vs CB	0.000813967	2.27977	2.27977	CE up vs KE	15.8217	3.70963	0.625237	1
51295	7949622	NM_001532 // SLC29A2 /// ENST00000357440 // SLC29A2 /// AK057041 // SLC29A2 ///	SLC29A2	NM_001532	0.000509995	0.245435	1.15148	1.15148	CE up vs CB	0.000183744	2.08325	2.08325	CE up vs KE	19.2762	2.28608	0.316255	1
51529	7949883	NM_000695 // ALDH3B2 /// NM_001031615 // ALDH3B2 /// ENST00000349015 // ALDH3B2	ALDH3B2	NM_000695	6.57353e-09	0.321669	0.955542	-1.04653	CE down vs CB	5.99489e-09	2.9976	2.9976	CE up vs KE	367.998	6.38828	0.0462921	1
51990	7950397	NM_173582 // PGM2L1 /// ENST00000298198 // PGM2L1 /// AB019210 // PGM2L1	PGM2L1	NM_173582	0.00154868	0.514621	0.897721	-1.11393	CE down vs CB	0.00129382	2.14985	2.14985	CE up vs KE	13.8815	3.25613	0.625512	1
52242	7950680	NM_080491 // GAB2 /// NM_012296 // GAB2 /// ENST00000340149 // GAB2 /// ENST0000	GAB2	NM_080491	0.00345944	0.000819554	2.66366	2.66366	CE up vs CB	0.00420446	2.106	2.106	CE up vs KE	10.8111	3.59035	0.885595	1
52449	7950912	NM_001814 // CTSC /// ENST00000227266 // CTSC /// AF234263 // CTSC /// AK296190	CTSC	NM_001814	4.90601e-05	0.0176804	1.30095	1.30095	CE up vs CB	8.62565e-06	2.41539	2.41539	CE up vs KE	36.9663	2.70418	0.195074	1
52591	7951075	NM_016403 // CWC15 /// ENST00000279839 // CWC15 /// BC040946 // CWC15	CWC15	NM_016403	0.00191645	0.157909	1.35278	1.35278	CE up vs CB	0.000433611	3.04516	3.04516	CE up vs KE	13.0067	4.5838	0.939781	1
52598	7951083	NM_144665 // SESN3 /// ENST00000278499 // SESN3 /// BC017296 // SESN3 /// AK3023	SESN3	NM_144665	1.13939e-05	0.000470538	0.47627	-2.09965	CE down vs CB	0.000102499	2.53004	2.53004	CE up vs KE	54.5486	8.74496	0.427507	1
53336	7951922	NM_012104 // BACE1 /// NM_138972 // BACE1 /// ENST00000313005 // BACE1 /// ENST0	BACE1	NM_012104	2.05224e-06	0.205555	1.1063	1.1063	CE up vs CB	9.81958e-07	2.64918	2.64918	CE up vs KE	85.3072	4.29468	0.13425	1
53392	7951981	NM_022003 // FXYD6 /// ENST00000260282 // FXYD6 /// BC018652 // FXYD6	FXYD6	NM_022003	0.000809881	0.963668	1.01119	1.01119	CE up vs CB	0.000772304	3.46825	3.46825	CE up vs KE	16.8473	8.84911	1.40068	1
53538	7952142	NM_001467 // SLC37A4 /// ENST00000357590 // SLC37A4 /// AB209026 // SLC37A4 ///	SLC37A4	NM_001467	0.00269083	0.394643	0.833622	-1.19958	CE down vs CB	0.0046421	2.19446	2.19446	CE up vs KE	11.7059	4.48707	1.02218	1
53639	7952253	NM_004205 // USP2 /// NM_171997 // USP2 /// ENST00000260187 // USP2 /// ENST0000	USP2	NM_004205	0.00105519	0.0378702	0.57121	-1.75067	CE down vs CB	0.00332311	2.53407	2.53407	CE up vs KE	15.5786	7.4154	1.26933	1
55173	7953983	NM_001987 // ETV6 /// ENST00000266427 // ETV6 /// BC043399 // ETV6 /// AF102845	ETV6	NM_001987	0.00289783	0.189129	0.760483	-1.31495	CE down vs CB	0.00461124	2.10018	2.10018	CE up vs KE	11.4361	3.89801	0.908937	1
55253	7954076	NR_002774 // HTR7P /// ENST00000331998 // HTR7P	HTR7P	NR_002774	5.2632e-05	0.400599	0.874358	-1.1437	CE down vs CB	0.000148465	2.76629	2.76629	CE up vs KE	36.2711	7.77157	0.57137	1
55676	7954547	NM_020183 // ARNTL2 /// ENST00000266503 // ARNTL2 /// BC125061 // ARNTL2 /// BC1	ARNTL2	NM_020183	0.00220703	0.709937	1.06811	1.06811	CE up vs CB	0.0010838	2.34139	2.34139	CE up vs KE	12.4522	3.40802	0.729834	1
56166	7955090	NM_000289 // PFKM /// ENST00000359794 // PFKM /// ENST00000395233 // PFKM /// EN	PFKM	NM_000289	3.70616e-07	0.325003	1.06652	1.06652	CE up vs CB	7.20415e-07	2.33876	2.33876	CE up vs KE	132.431	4.6785	0.0942074	1
56274	7955215	NM_024902 // DNAJC22 /// ENST00000357435 // DNAJC22 /// ENST00000395069 // DNAJC	DNAJC22	NM_024902	5.83861e-06	0.0205602	0.737672	-1.35562	CE down vs CB	8.5042e-06	2.87699	2.87699	CE up vs KE	65.0082	6.80281	0.279054	1
56491	7955455	NM_015416 // LETMD1 /// NM_001024668 // LETMD1 /// ENST00000262055 // LETMD1 ///	LETMD1	NM_015416	3.96991e-05	0.0680557	0.758829	-1.31782	CE down vs CB	7.22534e-05	2.65373	2.65373	CE up vs KE	39.136	6.28106	0.427983	1
56984	7956012	NM_152637 // METTL7B /// ENST00000394252 // METTL7B /// AY358508 // METTL7B ///	METTL7B	NM_152637	1.01556e-05	0.448309	0.928872	-1.07657	CE down vs CB	1.27388e-05	2.402	2.402	CE up vs KE	56.2264	4.51044	0.213918	1
56997	7956028	NM_005811 // GDF11 /// ENST00000257868 // GDF11 /// AF100907 // GDF11	GDF11	NM_005811	3.66615e-05	0.201612	0.842959	-1.1863	CE down vs CB	9.45325e-05	2.41405	2.41405	CE up vs KE	39.9819	5.64629	0.37659	1
57126	7956171	NM_015292 // ESYT1 /// ENST00000267113 // ESYT1 /// BC004998 // ESYT1 /// ENST00	ESYT1	NM_015292	8.37966e-05	0.798712	0.97195	-1.02886	CE down vs CB	0.000125542	2.10376	2.10376	CE up vs KE	31.9658	3.48647	0.29085	1
57264	7956324	NM_002332 // LRP1 /// ENST00000243077 // LRP1	LRP1	NM_002332	8.69261e-05	0.0093942	0.529372	-1.88903	CE down vs CB	0.000326366	3.07017	3.07017	CE up vs KE	31.6472	10.3887	0.87538	1
58269	7957430	NM_152588 // TMTC2 /// ENST00000321196 // TMTC2	TMTC2	NM_152588	3.95176e-05	0.0111804	0.676225	-1.4788	CE down vs CB	0.000332084	2.03956	2.03956	CE up vs KE	39.1842	5.22	0.355245	1
58370	7957557	NM_003877 // SOCS2 /// ENST00000340600 // SOCS2 /// BC070039 // SOCS2	SOCS2	NM_003877	0.000299509	0.178587	0.710434	-1.40759	CE down vs CB	0.000247737	4.2521	4.2521	CE up vs KE	22.4416	11.3004	1.34279	1
58593	7957807	AK292980 // SCYL2 /// AK125091 // SCYL2	SCYL2	AK292980	1.96817e-05	0.940969	0.991315	-1.00876	CE down vs CB	8.37219e-05	2.30165	2.30165	CE up vs KE	47.205	5.76241	0.325525	1
58820	7958055	NM_004316 // ASCL1 /// ENST00000266744 // ASCL1 /// BC004425 // ASCL1	ASCL1	NM_004316	0.000856387	0.00054129	5.88966	5.88966	CE up vs CB	0.0161771	2.6376	2.6376	CE up vs KE	16.5726	15.8474	2.54998	1
59738	7959051	NM_153348 // FBXW8 /// NM_012174 // FBXW8 /// ENST00000309909 // FBXW8 /// ENST0	FBXW8	NM_153348	0.000115255	0.638915	1.07509	1.07509	CE up vs CB	0.000121205	2.79695	2.79695	CE up vs KE	29.291	6.04865	0.550672	1
59831	7959160	NM_176818 // GATC /// ENST00000229384 // GATC /// AK094319 // GATC	GATC	NM_176818	1.49941e-05	0.202991	1.13119	1.13119	CE up vs CB	2.05938e-05	2.20059	2.20059	CE up vs KE	50.7343	3.75589	0.197415	1
59872	7959204	NM_031205 // CABP1 /// NM_004276 // CABP1 /// NM_001033677 // CABP1 /// ENST0000	CABP1	NM_031205	0.00332694	0.00353942	1.84858	1.84858	CE up vs CB	0.000701269	2.23244	2.23244	CE up vs KE	10.9465	2.32635	0.566716	1
59925	7959264	NM_002562 // P2RX7 /// ENST00000261826 // P2RX7 /// BC121158 // P2RX7 /// ENST00	P2RX7	NM_002562	0.000251147	0.00010569	3.98116	3.98116	CE up vs CB	9.76654e-05	4.04393	4.04393	CE up vs KE	23.585	8.4497	0.955377	1
59936	7959276	NM_002560 // P2RX4 /// ENST00000337233 // P2RX4 /// U83993 // P2RX4 /// ENST0000	P2RX4	NM_002560	8.592e-06	0.0984242	0.85977	-1.1631	CE down vs CB	1.77827e-05	2.07779	2.07779	CE up vs KE	58.752	3.59277	0.163071	1
60055	7959407	NM_030765 // B3GNT4 /// ENST00000324189 // B3GNT4 /// AY358940 // B3GNT4	B3GNT4	NM_030765	0.000351181	0.838059	1.06449	1.06449	CE up vs CB	0.00149929	4.04499	4.04499	CE up vs KE	21.4506	17.6008	2.18808	1
61386	7960870	NM_006931 // SLC2A3 /// ENST00000075120 // SLC2A3 /// AB209607 // SLC2A3	SLC2A3	NM_006931	9.14744e-05	0.00507733	1.78881	1.78881	CE up vs CB	0.000532783	2.33153	2.33153	CE up vs KE	31.2088	6.76855	0.578346	1
61839	7961395	NM_015987 // HEBP1 /// ENST00000014930 // HEBP1 /// AF117615 // HEBP1	HEBP1	NM_015987	1.44606e-08	0.416478	0.953242	-1.04905	CE down vs CB	2.34833e-08	3.31636	3.31636	CE up vs KE	301.643	8.82511	0.0780183	1
61948	7961518	NM_000900 // MGP /// ENST00000228938 // MGP /// BC093078 // MGP	MGP	NM_000900	0.00111358	0.265334	1.21018	1.21018	CE up vs CB	0.000495396	2.44994	2.44994	CE up vs KE	15.3305	3.64329	0.633733	1
62067	7961651	NM_134431 // SLCO1A2 /// ENST00000307378 // SLCO1A2 /// AF279784 // SLCO1A2 ///	SLCO1A2	NM_134431	0.0027409	0.923266	0.975909	-1.02469	CE down vs CB	0.00317309	2.77357	2.77357	CE up vs KE	11.6383	6.56081	1.50327	1
63669	7963413	NM_005554 // KRT6A /// NM_005555 // KRT6B /// NM_173086 // KRT6C /// ENST0000033	KRT6A	NM_005554	0.00155405	0.923591	0.97968	-1.02074	CE down vs CB	0.00223323	2.50005	2.50005	CE up vs KE	13.8669	5.58761	1.07452	1
64297	7964104	NM_014871 // PAN2 /// NM_001127460 // PAN2 /// ENST00000425394 // PAN2 /// ENST0	PAN2	NM_014871	2.11075e-05	0.470187	1.06767	1.06767	CE up vs CB	2.61745e-05	2.09939	2.09939	CE up vs KE	46.3357	3.23852	0.18638	1
64474	7964296	NM_003708 // RDH16 /// ENST00000398138 // RDH16 /// AB209332 // RDH16 /// ENST00	RDH16	NM_003708	0.000184588	0.0316404	0.433221	-2.30829	CE down vs CB	0.000377586	6.59528	6.59528	CE up vs KE	25.709	24.9341	2.58629	1
64653	7964487	NM_001478 // B4GALNT1 /// ENST00000341156 // B4GALNT1 /// AB209460 // B4GALNT1 /	B4GALNT1	NM_001478	8.28358e-05	0.782333	1.03693	1.03693	CE up vs CB	6.59533e-05	2.60732	2.60732	CE up vs KE	32.0666	4.83624	0.402182	1
64875	7964744	---		---	0.00302926	0.580969	0.829568	-1.20545	CE down vs CB	0.00929829	3.02205	3.02205	CE up vs KE	11.277	11.1456	2.6356	1
65431	7965360	NM_001001323 // ATP2B1 /// NM_001682 // ATP2B1 /// ENST00000359142 // ATP2B1 ///	ATP2B1	NM_001001323	1.20138e-05	0.356199	1.10938	1.10938	CE up vs CB	1.7154e-05	2.62277	2.62277	CE up vs KE	53.7922	5.66295	0.280733	1
65598	7965548	NM_018351 // FGD6 /// ENST00000343958 // FGD6 /// BC013319 // FGD6 /// ENST00000	FGD6	NM_018351	0.00132438	0.77498	0.921143	-1.08561	CE down vs CB	0.000544817	4.66439	4.66439	CE up vs KE	14.554	10.5177	1.92711	1
65866	7965850	NM_016053 // CCDC53 /// ENST00000240079 // CCDC53 /// AF151874 // CCDC53	CCDC53	NM_016053	2.78342e-05	0.15229	0.826158	-1.21042	CE down vs CB	2.83417e-05	2.78733	2.78733	CE up vs KE	43.0425	5.87399	0.363919	1
66234	7966260	NM_016433 // GLTP /// ENST00000318348 // GLTP	GLTP	NM_016433	0.00203153	0.2465	0.774275	-1.29153	CE down vs CB	0.00246907	2.4316	2.4316	CE up vs KE	12.7753	5.00906	1.04557	1
67211	7967327	NM_032554 // GPR81 /// ENST00000432564 // GPR81 /// AF385431 // GPR81	GPR81	NM_032554	3.69577e-05	0.00448103	0.6092	-1.6415	CE down vs CB	0.000139757	2.36363	2.36363	CE up vs KE	39.8956	6.00358	0.401286	1
67241	7967360	NM_020845 // PITPNM2 /// ENST00000320201 // PITPNM2 /// ENST00000280562 // PITPN	PITPNM2	NM_020845	0.00230234	0.00187314	3.50595	3.50595	CE up vs CB	0.000933339	4.07597	4.07597	CE up vs KE	12.2899	8.74794	1.89813	1
67334	7967460	NM_145058 // RILPL2 /// ENST00000280571 // RILPL2 /// AB085763 // RILPL2	RILPL2	NM_145058	0.00189415	0.0341818	0.401851	-2.48848	CE down vs CB	0.00773201	3.53286	3.53286	CE up vs KE	13.0536	15.6291	3.19282	1
67984	7968185	NM_016529 // ATP8A2 /// ENST00000281620 // ATP8A2 /// ENST00000381655 // ATP8A2	ATP8A2	NM_016529	4.97268e-05	0.598742	1.07374	1.07374	CE up vs CB	2.60013e-05	3.0527	3.0527	CE up vs KE	36.8318	5.81857	0.421271	1
68436	7968683	NM_207361 // FREM2 /// ENST00000280481 // FREM2 /// ENST00000454450 // FREM2 ///	FREM2	NM_207361	1.1936e-06	0.00029726	1.66577	1.66577	CE up vs CB	9.65775e-07	3.06013	3.06013	CE up vs KE	98.1116	6.48167	0.176171	1
69793	7970204	NM_001112732 // MCF2L /// NM_024979 // MCF2L /// ENST00000375608 // MCF2L /// EN	MCF2L	NM_001112732	0.00332223	0.987509	1.00415	1.00415	CE up vs CB	0.00275213	2.98622	2.98622	CE up vs KE	10.9515	6.75698	1.64531	1
70022	7970460	NM_015974 // CRYL1 /// ENST00000298248 // CRYL1 /// BC071810 // CRYL1 /// ENST00	CRYL1	NM_015974	0.00153113	0.730039	0.946389	-1.05665	CE down vs CB	0.00144972	2.07916	2.07916	CE up vs KE	13.9296	3.1012	0.593692	1
70117	7970573	NM_014363 // SACS /// ENST00000382298 // SACS /// ENST00000382292 // SACS /// EN	SACS	NM_014363	2.14809e-05	0.0103027	1.52467	1.52467	CE up vs CB	0.000224545	2.22759	2.22759	CE up vs KE	46.1201	6.90784	0.399411	1
70237	7970712	ENST00000381116 // MTIF3 /// AF265440 // MTIF3 /// AK094420 // MTIF3 /// uc001ur	MTIF3	ENST00000381116	0.00287788	0.639721	0.835516	-1.19686	CE down vs CB	0.0172332	3.02246	3.02246	CE up vs KE	11.461	14.6521	3.40914	1
70304	7970785	NM_002019 // FLT1 /// NM_001159920 // FLT1 /// NM_001160030 // FLT1 /// NM_00116	FLT1	NM_002019	0.000851635	0.00211713	3.8786	3.8786	CE up vs CB	0.000522691	5.45476	5.45476	CE up vs KE	16.5998	14.3746	2.30921	1
71002	7971574	NM_001268 // RCBTB2 /// ENST00000344532 // RCBTB2 /// BC029052 // RCBTB2 /// AF0	RCBTB2	NM_001268	3.21915e-05	0.0913527	1.13826	1.13826	CE up vs CB	6.18565e-06	2.02232	2.02232	CE up vs KE	41.4003	1.76726	0.113832	1
71641	7972300	NM_005845 // ABCC4 /// ENST00000376887 // ABCC4 /// AY207008 // ABCC4 /// ENST00	ABCC4	NM_005845	0.000386036	0.804505	0.952998	-1.04932	CE down vs CB	0.000486892	2.88988	2.88988	CE up vs KE	20.8798	6.92304	0.884177	1
71739	7972405	BC067807 // UGGT2	UGGT2	BC067807	0.00181852	0.00188683	4.01578	4.01578	CE up vs CB	0.00479237	3.25912	3.25912	CE up vs KE	13.2178	11.5833	2.33692	1
71899	7972588	NM_032813 // TMTC4 /// NM_001079669 // TMTC4 /// ENST00000376234 // TMTC4 /// EN	TMTC4	NM_032813	0.00247036	0.500842	1.10679	1.10679	CE up vs CB	0.000563217	2.21199	2.21199	CE up vs KE	12.0232	2.33294	0.517429	1
72529	7973309	NM_022060 // ABHD4 /// ENST00000216327 // ABHD4 /// BC024779 // ABHD4 /// ENST00	ABHD4	NM_022060	0.00105613	0.226413	0.830316	-1.20436	CE down vs CB	0.000869387	2.07804	2.07804	CE up vs KE	15.5745	2.93711	0.502893	1
73050	7973893	NM_022123 // NPAS3 /// NM_173159 // NPAS3 /// ENST00000426553 // NPAS3 /// ENST0	NPAS3	NM_022123	0.000317353	0.00696653	0.436586	-2.2905	CE down vs CB	0.00199318	2.81874	2.81874	CE up vs KE	22.0767	10.9492	1.32257	1
73177	7974042	BC103914 // TTC6 /// BC103915 // TTC6 /// BC103916 // TTC6 /// ENST00000267368 /	TTC6	BC103914	0.00196564	0.166123	1.34871	1.34871	CE up vs CB	0.0052146	2.11004	2.11004	CE up vs KE	12.9057	4.66015	0.962911	1
74609	7975625	NM_031427 // DNAL1 /// ENST00000311089 // DNAL1 /// BC005343 // DNAL1	DNAL1	NM_031427	1.24948e-05	0.405049	1.13484	1.13484	CE up vs CB	6.39201e-06	4.45772	4.45772	CE up vs KE	53.2381	10.3262	0.517233	1
74695	7975723	NM_015962 // FCF1 /// ENST00000341162 // FCF1 /// BC080600 // FCF1	FCF1	NM_015962	0.000285485	0.408323	1.10313	1.10313	CE up vs CB	0.000124258	2.17357	2.17357	CE up vs KE	22.748	2.69569	0.316007	1
74751	7975785	NM_005252 // FOS /// ENST00000303562 // FOS /// BX647104 // FOS	FOS	NM_005252	5.36973e-05	6.33325e-05	2.65698	2.65698	CE up vs CB	0.000270263	2.20971	2.20971	CE up vs KE	36.0751	5.593	0.413434	1
74951	7976005	NM_020421 // ADCK1 /// NM_001142545 // ADCK1 /// ENST00000341211 // ADCK1 /// EN	ADCK1	NM_020421	0.00296896	0.522492	1.10553	1.10553	CE up vs CB	0.0014154	2.04434	2.04434	CE up vs KE	11.3489	2.39258	0.562187	1
75135	7976220	AY358516 // C14orf159	C14orf159	AY358516	0.00239086	0.595695	0.879954	-1.13642	CE down vs CB	0.00360046	2.56322	2.56322	CE up vs KE	12.1465	6.09507	1.33812	1
75445	7976559	NR_023938 // C14orf132 /// ENST00000421193 // C14orf132	C14orf132	NR_023938	1.31002e-05	0.793732	0.975428	-1.02519	CE down vs CB	2.15964e-05	2.25045	2.25045	CE up vs KE	52.5774	4.17036	0.211516	1
76083	7977284	NM_199165 // ADSSL1 /// NM_152328 // ADSSL1 /// ENST00000330877 // ADSSL1 /// EN	ADSSL1	NM_199165	1.45385e-05	0.899379	1.0114	1.0114	CE up vs CB	2.21952e-05	2.14343	2.14343	CE up vs KE	51.15	3.61124	0.188269	1
76389	7977634	NM_201535 // NDRG2 /// NM_016250 // NDRG2 /// NM_201536 // NDRG2 /// NM_201537 /	NDRG2	NM_201535	1.69574e-05	0.81494	0.976143	-1.02444	CE down vs CB	1.13428e-05	2.61179	2.61179	CE up vs KE	49.1082	4.58253	0.24884	1
76661	7977939	NM_012244 // SLC7A8 /// NM_182728 // SLC7A8 /// ENST00000316902 // SLC7A8 /// EN	SLC7A8	NM_012244	0.000993601	0.0405311	0.532162	-1.87913	CE down vs CB	0.00900058	2.4246	2.4246	CE up vs KE	15.8597	9.92392	1.66862	1
76675	7977956	NM_020834 // HOMEZ /// ENST00000357460 // HOMEZ /// AF463523 // HOMEZ	HOMEZ	NM_020834	0.000365409	0.447807	0.897082	-1.11473	CE down vs CB	0.000274788	2.30819	2.30819	CE up vs KE	21.2094	3.67795	0.462431	1
76688	7977970	NM_020372 // SLC22A17 /// NM_016609 // SLC22A17 /// ENST00000206544 // SLC22A17	SLC22A17	NM_020372	2.33099e-05	0.0635778	0.775197	-1.29	CE down vs CB	4.97611e-05	2.5334	2.5334	CE up vs KE	45.1279	5.91799	0.349702	1
76796	7978087	NM_003917 // AP1G2 /// ENST00000308724 // AP1G2 /// ENST00000397120 // AP1G2	AP1G2	NM_003917	4.85042e-06	0.419051	0.941762	-1.06184	CE down vs CB	5.56526e-06	2.10682	2.10682	CE up vs KE	68.2323	3.17058	0.123913	1
77675	7979063	NM_182944 // NIN /// NM_020921 // NIN /// NM_016350 // NIN /// NM_182946 // NIN	NIN	NM_182944	1.29931e-05	0.61377	1.067	1.067	CE up vs CB	1.84737e-05	3.04043	3.04043	CE up vs KE	52.6915	7.52765	0.380967	1
77711	7979100	NM_002863 // PYGL /// ENST00000216392 // PYGL /// BC095850 // PYGL	PYGL	NM_002863	1.19376e-08	0.000225904	1.3083	1.3083	CE up vs CB	4.87124e-08	2.29389	2.29389	CE up vs KE	316.598	5.34797	0.0450454	1
77819	7979218	NM_006832 // FERMT2 /// NM_001134999 // FERMT2 /// NM_001135000 // FERMT2 /// EN	FERMT2	NM_006832	0.00141494	0.95587	0.990893	-1.00919	CE down vs CB	0.00068356	2.35786	2.35786	CE up vs KE	14.2665	3.43117	0.64135	1
77943	7979352	NR_027123 // C14orf33 /// ENST00000335142 // C14orf33	C14orf33	NR_027123	0.000769066	0.812374	0.955431	-1.04665	CE down vs CB	0.00099623	2.55345	2.55345	CE up vs KE	17.1052	5.53315	0.86261	1
77962	7979375	NM_006544 // EXOC5 /// ENST00000413566 // EXOC5 /// U85946 // EXOC5 /// ENST0000	EXOC5	NM_006544	0.000536642	0.480798	1.09852	1.09852	CE up vs CB	0.000307973	2.15568	2.15568	CE up vs KE	18.9948	2.8734	0.403394	1
78004	7979424	NM_012460 // TIMM9 /// ENST00000395159 // TIMM9 /// ENST00000216463 // TIMM9 ///	TIMM9	NM_012460	0.000629323	0.017504	1.87003	1.87003	CE up vs CB	0.00032428	3.51934	3.51934	CE up vs KE	18.1372	7.47716	1.09935	1
78012	7979433	NM_022571 // GPR135 /// ENST00000343189 // GPR135 /// ENST00000395116 // GPR135	GPR135	NM_022571	0.00296046	0.217363	1.43827	1.43827	CE up vs CB	0.00352112	3.02873	3.02873	CE up vs KE	11.3592	7.83812	1.84007	1
78228	7979674	NM_002382 // MAX /// NM_145112 // MAX /// NM_145113 // MAX /// ENST00000358664 /	MAX	NM_002382	3.41772e-05	0.00555733	1.47489	1.47489	CE up vs CB	1.19198e-05	2.68536	2.68536	CE up vs KE	40.7416	4.07919	0.266996	1
78259	7979711	NM_016445 // PLEK2 /// ENST00000216446 // PLEK2 /// AF228603 // PLEK2	PLEK2	NM_016445	0.000207039	0.860361	1.02884	1.02884	CE up vs CB	0.000253886	2.64726	2.64726	CE up vs KE	24.8981	5.71298	0.611879	1
78441	7979922	NM_018373 // SYNJ2BP /// ENST00000256366 // SYNJ2BP /// AY534623 // SYNJ2BP	SYNJ2BP	NM_018373	0.00238372	0.233136	0.816615	-1.22457	CE down vs CB	0.00210942	2.01495	2.01495	CE up vs KE	12.1578	2.80907	0.616136	1
78601	7980109	NM_005589 // ALDH6A1 /// ENST00000350259 // ALDH6A1 /// BC032371 // ALDH6A1	ALDH6A1	NM_005589	1.48818e-06	0.127627	0.909531	-1.09947	CE down vs CB	1.28859e-06	2.04545	2.04545	CE up vs KE	92.6901	2.70238	0.0777467	1
78817	7980346	NM_174976 // ZDHHC22 /// ENST00000319374 // ZDHHC22 /// BC117676 // ZDHHC22	ZDHHC22	NM_174976	0.00033761	0.00123216	1.90809	1.90809	CE up vs CB	0.000193077	2.3589	2.3589	CE up vs KE	21.6923	3.5688	0.438717	1
78942	7980488	NM_013989 // DIO2 /// NM_000793 // DIO2 /// NM_001007023 // DIO2 /// AF093774 //	DIO2	NM_013989	3.98633e-05	0.106831	0.738218	-1.35461	CE down vs CB	0.000108033	3.2435	3.2435	CE up vs KE	39.0925	10.2228	0.697342	1
79160	7980726	NM_001010854 // TTC7B /// ENST00000328459 // TTC7B /// ENST00000357056 // TTC7B	TTC7B	NM_001010854	0.00274688	0.107113	0.696868	-1.43499	CE down vs CB	0.00469813	2.16296	2.16296	CE up vs KE	11.6303	4.31446	0.989246	1
79389	7981023	NM_016150 // ASB2 /// ENST00000315988 // ASB2 /// AB056723 // ASB2 /// ENST00000	ASB2	NM_016150	0.00155866	0.180187	0.77622	-1.28829	CE down vs CB	0.00187629	2.19199	2.19199	CE up vs KE	13.8544	3.86193	0.743336	1
79411	7981047	NM_032036 // IFI27L2 /// ENST00000238609 // IFI27L2 /// BC032626 // IFI27L2	IFI27L2	NM_032036	2.08638e-05	0.0906373	0.82182	-1.21681	CE down vs CB	7.30591e-05	2.13715	2.13715	CE up vs KE	46.479	4.53132	0.259978	1
79904	7981605	ENST00000390543 // IGHG4 /// ENST00000390542 // IGHG4	IGHG4	ENST00000390543	0.000583915	0.000112238	7.08809	7.08809	CE up vs CB	0.00445666	2.98751	2.98751	CE up vs KE	18.5361	13.5754	1.953	1
80009	7981711	ENST00000390541 // IGHE /// ENST00000390540 // IGHE	IGHE	ENST00000390541	1.23494e-06	5.78508e-07	5.77911	5.77911	CE up vs CB	1.14787e-05	3.26602	3.26602	CE up vs KE	97.2553	13.838	0.379428	1
80802	7982696	NM_020168 // PAK6 /// NM_001128628 // PAK6 /// NM_001128629 // PAK6 /// ENST0000	PAK6	NM_020168	0.00337699	0.0148223	1.51366	1.51366	CE up vs CB	0.000679459	2.05046	2.05046	CE up vs KE	10.8946	1.83285	0.448626	1
80970	7982882	NM_007236 // CHP /// ENST00000334660 // CHP /// BC031293 // CHP	CHP	NM_007236	4.33645e-09	0.00123575	0.871136	-1.14793	CE down vs CB	8.07681e-09	2.00423	2.00423	CE up vs KE	408.651	3.06807	0.0200208	1
81029	7982946	NM_006293 // TYRO3 /// ENST00000263798 // TYRO3 /// D17517 // TYRO3	TYRO3	NM_006293	3.34876e-05	0.64953	0.91422	-1.09383	CE down vs CB	0.000107713	3.81362	3.81362	CE up vs KE	40.9648	13.8519	0.901713	1
81093	7983013	NM_014994 // MAPKBP1 /// NM_001128608 // MAPKBP1 /// ENST00000456763 // MAPKBP1	MAPKBP1	NM_014994	0.000653651	0.906275	0.980574	-1.01981	CE down vs CB	0.00172711	2.10553	2.10553	CE up vs KE	17.938	4.37804	0.650839	1
81270	7983202	NM_001012969 // ADAL /// ENST00000389651 // ADAL /// ENST00000305605 // ADAL	ADAL	NM_001012969	0.000225084	0.594304	1.18257	1.18257	CE up vs CB	8.26065e-05	9.13308	9.13308	CE up vs KE	24.3221	20.8236	2.28309	1
81442	7983398	NM_003104 // SORD /// ENST00000267814 // SORD /// BC021085 // SORD	SORD	NM_003104	2.42313e-07	0.111322	1.10747	1.10747	CE up vs CB	2.76477e-07	2.4426	2.4426	CE up vs KE	147.604	4.49873	0.0812758	1
81678	7983658	NM_003645 // SLC27A2 /// NM_001159629 // SLC27A2 /// ENST00000380902 // SLC27A2	SLC27A2	NM_003645	1.66329e-05	0.154604	1.14948	1.14948	CE up vs CB	4.2488e-05	2.03744	2.03744	CE up vs KE	49.3602	3.63109	0.196169	1
81732	7983717	NM_181789 // GLDN /// ENST00000335449 // GLDN /// BX538105 // GLDN /// ENST00000	GLDN	NM_181789	0.000134486	0.769833	0.954342	-1.04784	CE down vs CB	0.000262527	2.59994	2.59994	CE up vs KE	28.0707	6.2663	0.595287	1
81752	7983739	NM_014548 // TMOD2 /// NM_001142885 // TMOD2 /// ENST00000435126 // TMOD2 /// EN	TMOD2	NM_014548	7.08885e-05	0.273479	1.20505	1.20505	CE up vs CB	2.79535e-05	3.85634	3.85634	CE up vs KE	33.4571	7.88581	0.628531	1
82458	7984527	NM_001104554 // PAQR5 /// NM_017705 // PAQR5 /// ENST00000395407 // PAQR5 /// EN	PAQR5	NM_001104554	0.000135215	0.0191307	0.56509	-1.76963	CE down vs CB	0.000331465	3.21015	3.21015	CE up vs KE	28.0288	9.99311	0.950748	1
82485	7984556	NM_138555 // KIF23 /// ENST00000260363 // KIF23 /// ENST00000395392 // KIF23	KIF23	NM_138555	0.000254244	0.553926	0.928171	-1.07739	CE down vs CB	0.000140697	2.26618	2.26618	CE up vs KE	23.5037	3.20533	0.363668	1
82519	7984594	NM_024817 // THSD4 /// ENST00000355327 // THSD4 /// ENST00000261862 // THSD4 ///	THSD4	NM_024817	0.000227248	0.00523706	2.51423	2.51423	CE up vs CB	0.0152094	2.10921	2.10921	CE up vs KE	24.2569	13.3744	1.4703	1
82666	7984756	NM_001024736 // CD276 /// NM_025240 // CD276 /// ENST00000318443 // CD276 /// EN	CD276	NM_001024736	0.00222818	0.229682	1.27728	1.27728	CE up vs CB	0.000515252	2.86439	2.86439	CE up vs KE	12.4154	4.1188	0.884661	1
82820	7984925	NM_002435 // MPI /// ENST00000352410 // MPI /// BC046357 // MPI /// ENST00000323	MPI	NM_002435	0.000164739	0.295064	1.15254	1.15254	CE up vs CB	9.03325e-05	2.49766	2.49766	CE up vs KE	26.536	3.99072	0.401037	1
83131	7985284	NM_000137 // FAH /// ENST00000407106 // FAH /// ENST00000261755 // FAH /// M5515	FAH	NM_000137	0.000620102	0.809344	0.966757	-1.03439	CE down vs CB	0.000441755	2.17283	2.17283	CE up vs KE	18.2153	3.13534	0.459006	1
83142	7985296	NM_014862 // ARNT2 /// ENST00000303329 // ARNT2 /// BC036099 // ARNT2 /// ENST00	ARNT2	NM_014862	0.00119285	0.404028	0.860068	-1.1627	CE down vs CB	0.000790313	2.44826	2.44826	CE up vs KE	15.0185	4.11865	0.731304	1
83737	7985948	NM_020210 // SEMA4B /// NM_198925 // SEMA4B /// ENST00000332496 // SEMA4B /// EN	SEMA4B	NM_020210	0.000896714	0.98567	0.997112	-1.0029	CE down vs CB	0.000489111	2.41027	2.41027	CE up vs KE	16.349	3.73048	0.608474	1
83981	7986209	NM_014848 // SV2B /// ENST00000394232 // SV2B /// ENST00000330276 // SV2B /// BC	SV2B	NM_014848	0.000322451	0.0394679	0.550419	-1.8168	CE down vs CB	0.00093759	3.44675	3.44675	CE up vs KE	21.9771	12.15	1.47427	1
84526	7986842	NM_000275 // OCA2 /// ENST00000354638 // OCA2 /// M99564 // OCA2 /// ENST0000035	OCA2	NM_000275	0.000248895	0.914786	1.02022	1.02022	CE up vs CB	0.000137665	3.43164	3.43164	CE up vs KE	23.6448	7.2793	0.820961	1
86386	7988862	NM_006578 // GNB5 /// NM_016194 // GNB5 /// ENST00000261837 // GNB5 /// ENST0000	GNB5	NM_006578	3.35076e-05	0.485316	1.06558	1.06558	CE up vs CB	4.3344e-05	2.00442	2.00442	CE up vs KE	40.9583	2.89225	0.188305	1
86457	7988935	NM_000259 // MYO5A /// NM_001142495 // MYO5A /// ENST00000399231 // MYO5A /// EN	MYO5A	NM_000259	1.84702e-05	0.245828	0.882914	-1.13261	CE down vs CB	1.10244e-05	2.61193	2.61193	CE up vs KE	48.0079	4.44617	0.246969	1
86507	7988988	NM_004498 // ONECUT1 /// ENST00000305901 // ONECUT1 /// U96173 // ONECUT1	ONECUT1	NM_004498	0.00188566	0.499125	0.853524	-1.17161	CE down vs CB	0.0030898	2.54646	2.54646	CE up vs KE	13.0716	6.12895	1.25033	1
87405	7989970	NM_033429 // CALML4 /// NM_001031733 // CALML4 /// ENST00000354678 // CALML4 ///	CALML4	NM_033429	1.81203e-05	0.0020615	1.56675	1.56675	CE up vs CB	2.97713e-05	2.3298	2.3298	CE up vs KE	48.2521	4.54388	0.251119	1
87655	7990240	NM_031284 // ADPGK /// NR_023318 // ADPGK /// ENST00000311669 // ADPGK /// AF204	ADPGK	NM_031284	0.000489083	0.0471109	1.30528	1.30528	CE up vs CB	0.000174379	2.11056	2.11056	CE up vs KE	19.5102	2.36044	0.322626	1
87682	7990270	BC111368 // C15orf59 /// ENST00000379822 // C15orf59	C15orf59	BC111368	0.00203451	0.00440974	2.75059	2.75059	CE up vs CB	0.000526353	4.21257	4.21257	CE up vs KE	12.7695	7.96268	1.66285	1
88176	7990816	NM_001100879 // ST20 /// NM_001100880 // ST20 /// ENST00000322484 // ST20 /// EN	ST20	NM_001100879	2.8978e-06	0.0710597	0.829753	-1.20518	CE down vs CB	1.17984e-05	2.35894	2.35894	CE up vs KE	78.0144	5.87964	0.200976	1
88196	7990841	NM_181900 // STARD5 /// ENST00000302824 // STARD5 /// ENST00000394660 // IL16 //	STARD5	NM_181900	0.00220911	0.39564	1.18511	1.18511	CE up vs CB	0.00263822	2.25343	2.25343	CE up vs KE	12.4486	4.17465	0.894271	1
88765	7991489	NM_001040655 // TTC23 /// NM_022905 // TTC23 /// NM_001040656 // TTC23 /// NM_00	TTC23	NM_001040655	0.00246581	0.987343	0.996603	-1.00341	CE down vs CB	0.000963606	2.87034	2.87034	CE up vs KE	12.0302	4.87137	1.07981	1
88885	7991624	NM_002570 // PCSK6 /// NM_138319 // PCSK6 /// NM_138322 // PCSK6 /// NM_138324 /	PCSK6	NM_002570	0.000267586	0.181531	0.818074	-1.22238	CE down vs CB	0.000219722	2.39142	2.39142	CE up vs KE	23.1675	4.086	0.470314	1
89073	7991844	NM_005009 // NME4 /// ENST00000219479 // NME4 /// BC004880 // NME4 /// BC017067	NME4	NM_005009	4.4614e-08	0.148492	0.906489	-1.10316	CE down vs CB	7.93781e-08	3.08917	3.08917	CE up vs KE	226.879	8.01087	0.0941573	1
89134	7991911	NM_148920 // PIGQ /// NM_004204 // PIGQ /// ENST00000026218 // PIGQ /// ENST0000	PIGQ	NM_148920	0.00199243	0.881267	0.972597	-1.02818	CE down vs CB	0.00197933	2.25331	2.25331	CE up vs KE	12.8521	3.90823	0.810917	1
90850	7993806	NM_020424 // LYRM1 /// NM_001128301 // LYRM1 /// NM_001128302 // LYRM1 /// ENST0	LYRM1	NM_020424	7.72434e-05	0.0710064	1.20707	1.20707	CE up vs CB	5.37621e-05	2.01944	2.01944	CE up vs KE	32.684	2.50362	0.204269	1
90879	7993841	NM_016025 // METTL9 /// NM_001077180 // METTL9 /// ENST00000358154 // METTL9 ///	METTL9	NM_016025	3.26581e-06	0.385629	1.09932	1.09932	CE up vs CB	4.94598e-06	3.03121	3.03121	CE up vs KE	75.6305	7.54299	0.265959	1
91103	7994088	NM_000336 // SCNN1B /// ENST00000343070 // SCNN1B /// BC036352 // SCNN1B /// ENS	SCNN1B	NM_000336	0.00223724	0.00270419	4.19042	4.19042	CE up vs CB	0.0256085	2.5015	2.5015	CE up vs KE	12.3998	13.0434	2.80506	1
91869	7994932	NM_000294 // PHKG2 /// ENST00000328273 // PHKG2 /// M31606 // PHKG2	PHKG2	NM_000294	0.000225011	0.391806	0.900377	-1.11065	CE down vs CB	0.000281846	2.03399	2.03399	CE up vs KE	24.3243	3.06204	0.33569	1
92287	7995404	NM_000293 // PHKB /// NM_001031835 // PHKB /// ENST00000323584 // PHKB /// ENST0	PHKB	NM_000293	9.41246e-07	0.908778	0.990073	-1.01003	CE down vs CB	1.37966e-06	2.9227	2.9227	CE up vs KE	104.294	6.9527	0.177772	1
92502	7995640	NM_005611 // RBL2 /// ENST00000262133 // RBL2 /// BC034490 // RBL2 /// ENST00000	RBL2	NM_005611	0.000276585	0.100513	0.791612	-1.26325	CE down vs CB	0.000460581	2.04646	2.04646	CE up vs KE	22.9523	3.40715	0.395852	1
92528	7995667	NM_001080432 // FTO /// ENST00000268349 // FTO	FTO	NM_001080432	2.899e-07	0.0356898	0.86588	-1.15489	CE down vs CB	6.96492e-07	2.21082	2.21082	CE up vs KE	141.005	4.30563	0.0814278	1
92557	7995700	NM_017839 // LPCAT2 /// ENST00000262134 // LPCAT2 /// BC002472 // LPCAT2	LPCAT2	NM_017839	3.60167e-05	0.256483	0.896308	-1.11569	CE down vs CB	3.81131e-05	2.07571	2.07571	CE up vs KE	40.1727	3.0195	0.200434	1
92634	7995785	NM_005953 // MT2A /// ENST00000245185 // MT2A /// BC007034 // MT2A	MT2A	NM_005953	1.26501e-06	0.995592	1.00041	1.00041	CE up vs CB	2.37069e-06	2.34323	2.34323	CE up vs KE	96.6544	4.68047	0.129133	1
92642	7995795	NR_001447 // MT1L /// X97261 // MT1L	MT1L	NR_001447	0.000126192	0.325367	0.861524	-1.16073	CE down vs CB	0.000234455	2.44802	2.44802	CE up vs KE	28.5684	5.41497	0.50545	1
92650	7995805	AF348994 // MT1JP /// BC103839 // MT1JP	MT1JP	AF348994	0.00196332	0.325353	0.837251	-1.19439	CE down vs CB	0.00336348	2.00923	2.00923	CE up vs KE	12.9104	3.47527	0.717821	1
92654	7995810	NM_005946 // MT1A /// ENST00000443255 // MT1A /// ENST00000290705 // MT1A /// BC	MT1A	NM_005946	1.93408e-06	0.29543	0.904456	-1.10564	CE down vs CB	3.55629e-06	2.7376	2.7376	CE up vs KE	86.6252	6.52901	0.200989	1
92658	7995815	NR_003658 // MT1DP /// NR_027781 // MT1DP /// AF348999 // MT1DP /// ENST00000262	MT1DP	NR_003658	1.97842e-07	0.0120393	0.822639	-1.2156	CE down vs CB	1.1167e-06	2.20264	2.20264	CE up vs KE	155.431	5.31569	0.0911989	1
92662	7995822	NM_005947 // MT1B /// ENST00000334346 // MT1B /// AY168638 // MT1B	MT1B	NM_005947	7.92009e-06	0.591007	0.95619	-1.04582	CE down vs CB	1.77229e-05	2.06421	2.06421	CE up vs KE	60.0208	3.60151	0.160012	1
92666	7995827	NM_005949 // MT1F /// ENST00000334350 // MT1F /// BC029453 // MT1F /// ENST00000	MT1F	NM_005949	1.66561e-07	0.0299179	0.847577	-1.17983	CE down vs CB	4.29137e-07	2.52999	2.52999	CE up vs KE	162.394	5.9884	0.0983352	1
92670	7995832	NM_005951 // MT1H /// ENST00000332374 // MT1H /// BC008408 // MT1H	MT1H	NM_005951	2.19139e-07	0.153577	0.894005	-1.11856	CE down vs CB	3.23553e-07	2.97548	2.97548	CE up vs KE	151.435	7.16493	0.12617	1
92673	7995836	NR_003669 // MT1IP /// ENST00000394490 // MT1X	MT1IP	NR_003669	0.00192508	0.531807	0.843163	-1.18601	CE down vs CB	0.00284454	3.02371	3.02371	CE up vs KE	12.9888	8.29208	1.70241	1
92676	7995840	NM_005952 // MT1X /// ENST00000394485 // MT1X /// BC032131 // MT1X /// ENST00000	MT1X	NM_005952	7.0687e-07	0.2476	0.918464	-1.08877	CE down vs CB	2.80862e-06	2.20295	2.20295	CE up vs KE	112.252	4.88945	0.116154	1
92815	7995986	NM_152727 // CPNE2 /// ENST00000290776 // CPNE2 /// BC053658 // CPNE2	CPNE2	NM_152727	0.000461087	0.569943	0.922006	-1.08459	CE down vs CB	0.000300529	2.29677	2.29677	CE up vs KE	19.8439	3.49225	0.469295	1
92878	7996056	NM_032940 // POLR2C /// ENST00000219252 // POLR2C /// BC028157 // POLR2C	POLR2C	NM_032940	3.01879e-07	0.217177	0.908188	-1.10109	CE down vs CB	1.02119e-06	2.58686	2.58686	CE up vs KE	139.555	6.75508	0.129079	1
92967	7996150	NM_005886 // KATNB1 /// ENST00000379661 // KATNB1 /// ENST00000268509 // KATNB1	KATNB1	NM_005886	1.63789e-05	0.1422	1.13028	1.13028	CE up vs CB	3.93538e-06	2.30094	2.30094	CE up vs KE	49.5618	2.62707	0.141349	1
93038	7996228	NM_020465 // NDRG4 /// NM_001130487 // NDRG4 /// NM_022910 // NDRG4 /// ENST0000	NDRG4	NM_020465	0.000185342	0.817473	0.955387	-1.0467	CE down vs CB	0.00645306	2.0122	2.0122	CE up vs KE	25.6798	8.80558	0.914397	1
93268	7996488	NM_024712 // ELMO3 /// ENST00000393997 // ELMO3 /// AK300976 // ELMO3 /// ENST00	ELMO3	NM_024712	0.0016217	0.648752	0.911901	-1.09661	CE down vs CB	0.000759224	2.79094	2.79094	CE up vs KE	13.6884	4.87093	0.94892	1
94048	7997349	NM_005752 // CLEC3A /// ENST00000299642 // CLEC3A /// AY358376 // CLEC3A	CLEC3A	NM_005752	0.000437147	0.410618	0.898032	-1.11355	CE down vs CB	0.000307907	2.11447	2.11447	CE up vs KE	20.15	2.89671	0.383353	1
94847	7998234	NM_021259 // TMEM8A /// ENST00000431232 // TMEM8A /// BC021557 // TMEM8A /// AB0	TMEM8A	NM_021259	0.00233932	0.606416	0.922788	-1.08367	CE down vs CB	0.00128839	2.06541	2.06541	CE up vs KE	12.2292	2.57255	0.560964	1
94978	7998376	NM_016541 // GNG13 /// ENST00000248150 // GNG13 /// AY029486 // GNG13	GNG13	NM_016541	0.00163975	0.0247731	1.77002	1.77002	CE up vs CB	0.000221436	3.72177	3.72177	CE up vs KE	13.6423	5.47899	1.07098	1
96138	7999681	NM_002474 // MYH11 /// NM_001040114 // MYH11 /// NM_022844 // MYH11 /// NM_00104	MYH11	NM_002474	0.000739176	0.00032746	2.27376	2.27376	CE up vs CB	0.000196287	2.42546	2.42546	CE up vs KE	17.3051	3.04932	0.469891	1
96651	8000246	NM_020718 // USP31 /// ENST00000219689 // USP31 /// AK092790 // USP31	USP31	NM_020718	0.00124283	0.0292979	2.20768	2.20768	CE up vs CB	0.0441021	2.04095	2.04095	CE up vs KE	14.8348	12.4177	2.23217	1
96966	8000587	NM_001054 // SULT1A2 /// NM_177528 // SULT1A2 /// ENST00000335715 // SULT1A2 ///	SULT1A2	NM_001054	0.00222954	0.123366	0.663325	-1.50756	CE down vs CB	0.00304046	2.7146	2.7146	CE up vs KE	12.4131	6.60646	1.41925	1
97068	8000707	NM_006319 // CDIPT /// ENST00000219789 // CDIPT /// BC001444 // CDIPT /// AF0148	CDIPT	NM_006319	8.48457e-07	0.290184	0.92084	-1.08596	CE down vs CB	3.25449e-06	2.28661	2.28661	CE up vs KE	107.113	5.31898	0.132421	1
97101	8000742	NM_178863 // KCTD13 /// ENST00000308768 // KCTD13 /// BC036228 // KCTD13	KCTD13	NM_178863	0.00203971	0.925902	1.02032	1.02032	CE up vs CB	0.000823402	2.97314	2.97314	CE up vs KE	12.7595	5.2493	1.09708	1
97367	8001051	NM_003041 // SLC5A2 /// ENST00000330498 // SLC5A2 /// M95549 // SLC5A2 /// ENST0	SLC5A2	NM_003041	0.00123471	0.279605	0.773561	-1.29272	CE down vs CB	0.00364544	2.45548	2.45548	CE up vs KE	14.864	6.82368	1.2242	1
97373	8001057	ENST00000452223 // C16orf58 /// ENST00000430477 // C16orf58 /// AK023930 // C16o	C16orf58	ENST00000452223	3.34041e-05	0.588999	0.933255	-1.07152	CE down vs CB	8.14511e-05	2.45901	2.45901	CE up vs KE	40.9922	5.7842	0.376279	1
97502	8001208	NM_018092 // NETO2 /// ENST00000303155 // NETO2 /// AY358718 // NETO2	NETO2	NM_018092	0.00259618	0.245356	1.27201	1.27201	CE up vs CB	0.00113334	2.58127	2.58127	CE up vs KE	11.838	4.08363	0.919894	1
98163	8001941	NM_003789 // TRADD /// ENST00000345057 // TRADD /// BC004491 // TRADD	TRADD	NM_003789	0.000478418	0.222388	0.835229	-1.19728	CE down vs CB	0.000416094	2.1949	2.1949	CE up vs KE	19.6345	3.40581	0.462561	1
98276	8002066	NM_001082486 // ACD /// NM_022914 // ACD /// NM_001082487 // ACD /// ENST0000039	ACD	NM_001082486	0.000748588	0.439993	1.16492	1.16492	CE up vs CB	0.00113844	2.52857	2.52857	CE up vs KE	17.2411	5.69977	0.881581	1
98423	8002228	NM_024939 // ESRP2 /// ENST00000251366 // ESRP2 /// BC069241 // ESRP2	ESRP2	NM_024939	0.00331287	0.990215	1.00206	1.00206	CE up vs CB	0.00178785	2.1117	2.1117	CE up vs KE	10.9613	2.72752	0.66355	1
99456	8003374	NM_001142864 // FAM38A /// D87071 // FAM38A /// AB161230 // FAM38A /// BC150271	FAM38A	NM_001142864	1.20303e-05	0.745339	1.034	1.034	CE up vs CB	1.47784e-05	2.51623	2.51623	CE up vs KE	53.7727	4.97906	0.246919	1
99936	8003916	NM_004313 // ARRB2 /// NM_199004 // ARRB2 /// ENST00000346341 // ARRB2 /// ENST0	ARRB2	NM_004313	1.29985e-05	0.122253	1.27189	1.27189	CE up vs CB	2.57622e-05	3.31191	3.31191	CE up vs KE	52.6857	9.55888	0.483819	1
100260	8004270	NM_201566 // SLC16A13 /// ENST00000308027 // SLC16A13 /// BC142618 // SLC16A13	SLC16A13	NM_201566	1.59199e-05	0.0488397	0.803082	-1.2452	CE down vs CB	5.49237e-05	2.07941	2.07941	CE up vs KE	49.9363	4.17526	0.222964	1
101402	8005527	NM_002767 // PRPSAP2 /// ENST00000395656 // PRPSAP2 /// ENST00000268835 // PRPSA	PRPSAP2	NM_002767	0.000206956	0.975893	0.996612	-1.0034	CE down vs CB	0.000184514	2.03301	2.03301	CE up vs KE	24.9009	2.76334	0.29593	1
101489	8005625	NM_018242 // SLC47A1 /// ENST00000270570 // SLC47A1 /// BC010661 // SLC47A1 ///	SLC47A1	NM_018242	0.00218513	0.00403831	2.96047	2.96047	CE up vs CB	0.00031927	5.14306	5.14306	CE up vs KE	12.4907	8.68203	1.85354	1
101664	8005846	NM_014573 // TMEM97 /// ENST00000226230 // TMEM97 /// BC045655 // TMEM97 /// ENS	TMEM97	NM_014573	0.000982071	0.0174462	1.55414	1.55414	CE up vs CB	0.00124325	2.05211	2.05211	CE up vs KE	15.9147	3.25067	0.544681	1
101868	8006072	NM_152345 // ANKRD13B /// ENST00000394859 // ANKRD13B /// BC032554 // ANKRD13B /	ANKRD13B	NM_152345	0.00102288	0.00351705	1.96685	1.96685	CE up vs CB	0.000639004	2.44984	2.44984	CE up vs KE	15.7234	4.04102	0.685349	1
101926	8006137	NM_001304 // CPD /// ENST00000225719 // CPD /// BC051702 // CPD	CPD	NM_001304	0.000192642	0.95715	0.993012	-1.00704	CE down vs CB	0.000560386	2.01033	2.01033	CE up vs KE	25.4046	3.80784	0.399701	1
102752	8007055	NM_016339 // RAPGEFL1 /// ENST00000436615 // RAPGEFL1 /// AF117946 // RAPGEFL1 /	RAPGEFL1	NM_016339	9.46651e-07	1.38283e-06	5.64814	5.64814	CE up vs CB	1.17043e-05	3.68681	3.68681	CE up vs KE	104.141	18.1022	0.463532	1
102796	8007104	NM_001552 // IGFBP4 /// ENST00000269593 // IGFBP4 /// BC016041 // IGFBP4	IGFBP4	NM_001552	1.68574e-07	1.62824e-07	8.19426	8.19426	CE up vs CB	0.000351634	2.10384	2.10384	CE up vs KE	161.898	23.8929	0.393546	1
102838	8007159	NM_021939 // FKBP10 /// ENST00000321562 // FKBP10 /// BC016467 // FKBP10 /// ENS	FKBP10	NM_021939	0.000185452	0.335913	1.13901	1.13901	CE up vs CB	0.000227325	2.23401	2.23401	CE up vs KE	25.6756	3.8874	0.403746	1
102928	8007257	NM_000263 // NAGLU /// ENST00000225927 // NAGLU /// U40846 // NAGLU	NAGLU	NM_000263	0.000404943	0.724653	0.949965	-1.05267	CE down vs CB	0.000491283	2.20858	2.20858	CE up vs KE	20.5965	3.81751	0.494262	1
103354	8007737	NM_001135704 // ACBD4 /// NM_024722 // ACBD4 /// NM_001135706 // ACBD4 /// NM_00	ACBD4	NM_001135704	0.000782723	0.309077	1.15379	1.15379	CE up vs CB	0.000313811	2.21189	2.21189	CE up vs KE	17.017	2.7651	0.433308	1
103615	8008028	NM_014726 // TBKBP1 /// ENST00000361722 // TBKBP1 /// BC152407 // TBKBP1	TBKBP1	NM_014726	8.95518e-06	0.000178781	1.66162	1.66162	CE up vs CB	7.73417e-06	2.19277	2.19277	CE up vs KE	58.1167	3.27319	0.150189	1
103654	8008073	NM_018129 // PNPO /// ENST00000225573 // PNPO /// BC006525 // PNPO /// ENST00000	PNPO	NM_018129	1.68201e-08	0.155669	1.05436	1.05436	CE up vs CB	3.31723e-08	2.00043	2.00043	CE up vs KE	290.349	3.10198	0.0284897	1
103959	8008408	NM_022827 // SPATA20 /// ENST00000006658 // SPATA20 /// ENST00000393244 // SPATA	SPATA20	NM_022827	3.20597e-06	0.187146	0.858072	-1.1654	CE down vs CB	8.53531e-06	2.88737	2.88737	CE up vs KE	75.9946	8.01463	0.281235	1
104037	8008488	NM_003786 // ABCC3 /// ENST00000285238 // ABCC3 /// AF085692 // ABCC3	ABCC3	NM_003786	3.03425e-05	0.993884	1.00139	1.00139	CE up vs CB	1.53038e-05	5.08979	5.08979	CE up vs KE	42.061	12.2263	0.775149	1
104102	8008561	NM_005486 // TOM1L1 /// ENST00000445275 // TOM1L1 /// AK303912 // TOM1L1 /// ENS	TOM1L1	NM_005486	4.03788e-06	0.719114	1.02957	1.02957	CE up vs CB	2.33983e-06	2.5285	2.5285	CE up vs KE	71.5706	4.09878	0.152717	1
104183	8008652	NM_021626 // SCPEP1 /// ENST00000262288 // SCPEP1 /// AF282618 // SCPEP1 /// ENS	SCPEP1	NM_021626	0.000568506	0.354514	1.1486	1.1486	CE up vs CB	0.000180296	2.51434	2.51434	CE up vs KE	18.6804	3.47713	0.496368	1
104315	8008806	NM_182569 // GDPD1 /// ENST00000284116 // GDPD1 /// ENST00000376124 // GDPD1 ///	GDPD1	NM_182569	0.000930928	0.518628	0.876704	-1.14064	CE down vs CB	0.000483661	3.00548	3.00548	CE up vs KE	16.169	5.75296	0.948807	1
104554	8009072	NM_006039 // MRC2 /// ENST00000303375 // MRC2 /// BC146647 // MRC2 /// ENST00000	MRC2	NM_006039	0.00142853	0.847206	1.07199	1.07199	CE up vs CB	0.00055482	6.89583	6.89583	CE up vs KE	14.2253	16.2532	3.04682	1
104783	8009319	NM_002737 // PRKCA /// ENST00000284384 // PRKCA /// BC109273 // PRKCA /// ENST00	PRKCA	NM_002737	0.0010251	0.442587	1.12977	1.12977	CE up vs CB	0.000260399	2.54978	2.54978	CE up vs KE	15.7133	3.35804	0.569883	1
104936	8009490	NM_002758 // MAP2K6 /// ENST00000359094 // MAP2K6 /// BC012009 // MAP2K6 /// ENS	MAP2K6	NM_002758	0.000622778	0.354434	0.784569	-1.27458	CE down vs CB	0.000550951	3.92002	3.92002	CE up vs KE	18.1925	10.3817	1.52176	1
104961	8009523	NM_000346 // SOX9 /// ENST00000245479 // SOX9	SOX9	NM_000346	1.60187e-06	0.000447203	0.552351	-1.81044	CE down vs CB	8.43244e-06	2.82852	2.82852	CE up vs KE	90.9462	9.19264	0.269541	1
105217	8009823	NM_014738 // KIAA0195 /// ENST00000314256 // KIAA0195 /// BC045540 // KIAA0195 /	KIAA0195	NM_014738	1.28824e-05	0.218956	0.864974	-1.1561	CE down vs CB	1.68114e-05	2.69591	2.69591	CE up vs KE	52.8106	5.8492	0.295355	1
105723	8010377	NM_000152 // GAA /// NM_001079803 // GAA /// NM_001079804 // GAA /// ENST0000030	GAA	NM_000152	0.00194685	0.546479	1.13674	1.13674	CE up vs CB	0.000560117	3.07601	3.07601	CE up vs KE	12.9439	5.02268	1.03476	1
106673	8011420	NM_002561 // P2RX5 /// NM_175080 // P2RX5 /// ENST00000225328 // P2RX5 /// ENST0	P2RX5	NM_002561	0.00120987	0.0128673	1.84188	1.84188	CE up vs CB	0.00242985	2.30403	2.30403	CE up vs KE	14.9549	5.14569	0.91755	1
107340	8012142	NM_015982 // YBX2 /// ENST00000007699 // YBX2 /// AF096834 // YBX2	YBX2	NM_015982	0.000911641	0.754762	0.923008	-1.08341	CE down vs CB	0.000669784	3.78377	3.78377	CE up vs KE	16.2694	9.35829	1.53389	1
107437	8012248	NM_133491 // SAT2 /// ENST00000269298 // SAT2 /// BC011751 // SAT2 /// ENST00000	SAT2	NM_133491	0.00150422	0.0370577	1.35421	1.35421	CE up vs CB	0.000429478	2.00941	2.00941	CE up vs KE	14.0047	1.93269	0.368008	1
107488	8012305	NM_021210 // TRAPPC1 /// ENST00000303731 // TRAPPC1 /// BC032717 // TRAPPC1	TRAPPC1	NM_021210	7.21964e-07	0.887027	1.01065	1.01065	CE up vs CB	9.65045e-07	2.61614	2.61614	CE up vs KE	111.645	5.45206	0.130223	1
107629	8012457	BC105995 // SLC25A35	SLC25A35	BC105995	0.000931596	0.966229	0.993129	-1.00692	CE down vs CB	0.000531544	2.40689	2.40689	CE up vs KE	16.1655	3.77175	0.622188	1
107859	8012705	NM_017533 // MYH4 /// ENST00000255381 // MYH4 /// AF111783 // MYH4	MYH4	NM_017533	0.000469762	0.930613	1.01567	1.01567	CE up vs CB	0.000151702	3.19257	3.19257	CE up vs KE	19.7379	5.53882	0.748317	1
108036	8012899	NM_000304 // PMP22 /// NM_153321 // PMP22 /// NM_153322 // PMP22 /// ENST0000031	PMP22	NM_000304	2.28616e-10	2.02808e-08	0.513276	-1.94827	CE down vs CB	2.90201e-09	2.34641	2.34641	CE up vs KE	856.015	7.46759	0.0232631	1
108288	8013192	NM_002018 // FLII /// ENST00000327031 // FLII /// BC025300 // FLII /// ENST00000	FLII	NM_002018	0.000190482	0.713584	1.0554	1.0554	CE up vs CB	0.000369069	2.30214	2.30214	CE up vs KE	25.4846	4.79646	0.501894	1
108658	8013626	NM_144610 // FLJ25006 /// ENST00000378976 // FLJ25006 /// ENST00000301037 // FLJ	FLJ25006	NM_144610	0.000893103	0.874547	0.97139	-1.02945	CE down vs CB	0.000463629	2.75067	2.75067	CE up vs KE	16.3685	4.86086	0.791904	1
108693	8013664	NM_005165 // ALDOC /// ENST00000395321 // ALDOC /// ENST00000226253 // ALDOC ///	ALDOC	NM_005165	5.71432e-06	0.00903661	1.54381	1.54381	CE up vs CB	0.000462222	2.05663	2.05663	CE up vs KE	65.3747	9.84999	0.401786	1
108721	8013693	NM_006461 // SPAG5 /// ENST00000321765 // SPAG5 /// AK292398 // SPAG5	SPAG5	NM_006461	1.09326e-07	0.401677	1.04425	1.04425	CE up vs CB	2.20798e-07	2.19874	2.19874	CE up vs KE	180.745	4.04677	0.0597049	1
108875	8013861	NM_078471 // MYO18A /// NM_203318 // MYO18A /// NM_004740 // TIAF1 /// ENST00000	MYO18A	NM_078471	5.37626e-06	0.310792	0.926113	-1.07978	CE down vs CB	6.64585e-06	2.08134	2.08134	CE up vs KE	66.4242	3.13114	0.125703	1
109106	8014119	NM_015194 // MYO1D /// ENST00000318217 // MYO1D /// BC146763 // MYO1D	MYO1D	NM_015194	5.55102e-06	0.0896001	1.15602	1.15602	CE up vs CB	8.37528e-06	2.12169	2.12169	CE up vs KE	65.8717	3.47844	0.140817	1
109161	8014182	NM_006584 // CCT6B /// ENST00000314144 // CCT6B /// AK302344 // CCT6B /// AK3017	CCT6B	NM_006584	0.00262983	0.502344	0.822746	-1.21544	CE down vs CB	0.00184292	3.55168	3.55168	CE up vs KE	11.7903	8.52021	1.92705	1
110376	8015548	NM_201434 // RAB5C /// NM_004583 // RAB5C /// ENST00000393860 // RAB5C /// ENST0	RAB5C	NM_201434	1.5789e-05	0.338573	0.92012	-1.08681	CE down vs CB	1.55058e-05	2.12592	2.12592	CE up vs KE	50.0455	3.13621	0.167112	1
110666	8015870	NM_005374 // MPP2 /// ENST00000269095 // MPP2 /// BC030287 // MPP2 /// ENST00000	MPP2	NM_005374	0.000517866	0.365506	0.864949	-1.15614	CE down vs CB	0.000671011	2.25219	2.25219	CE up vs KE	19.1912	4.11158	0.571315	1
110811	8016028	NM_001143780 // SLC25A39 /// NM_016016 // SLC25A39 /// ENST00000225308 // SLC25A	SLC25A39	NM_001143780	7.11522e-05	0.156534	1.19311	1.19311	CE up vs CB	3.18004e-05	2.56992	2.56992	CE up vs KE	33.4233	3.99168	0.318474	1
110930	8016160	NM_024819 // DCAKD /// NM_001128631 // DCAKD /// ENST00000342350 // DCAKD /// EN	DCAKD	NM_024819	5.37147e-08	0.837947	0.988458	-1.01168	CE down vs CB	1.50154e-07	2.53542	2.53542	CE up vs KE	216.457	6.12102	0.0754086	1
111138	8016395	NM_016429 // COPZ2 /// ENST00000006101 // COPZ2 /// BC015924 // COPZ2	COPZ2	NM_016429	0.00146125	0.201215	0.774657	-1.29089	CE down vs CB	0.00207019	2.27147	2.27147	CE up vs KE	14.1282	4.44832	0.839611	1
111393	8016693	NM_000088 // COL1A1 /// ENST00000225964 // COL1A1 /// Z74615 // COL1A1	COL1A1	NM_000088	1.3613e-05	0.0137013	0.497567	-2.00978	CE down vs CB	0.000928489	3.10245	3.10245	CE up vs KE	52.0469	24.0135	1.23035	1
111523	8016839	NM_012329 // MMD /// ENST00000262065 // MMD /// AY424289 // MMD	MMD	NM_012329	1.23371e-07	0.00223977	1.55787	1.55787	CE up vs CB	9.28478e-08	6.0969	6.0969	CE up vs KE	175.278	16.5481	0.251762	1
111564	8016887	NM_017949 // CUEDC1 /// ENST00000407144 // CUEDC1 /// ENST00000360238 // CUEDC1	CUEDC1	NM_017949	0.00328739	0.0179498	2.6064	2.6064	CE up vs CB	0.0549408	2.06479	2.06479	CE up vs KE	10.9883	10.7281	2.60353	1
112657	8018083	NM_001159770 // SLC39A11 /// NM_139177 // SLC39A11 /// ENST00000255559 // SLC39A	SLC39A11	NM_001159770	7.20136e-08	0.0492397	0.879399	-1.13714	CE down vs CB	2.21962e-07	2.44411	2.44411	CE up vs KE	200.952	5.79645	0.0769197	1
112716	8018148	NM_001144952 // SDK2 /// ENST00000409227 // SDK2 /// ENST00000392650 // SDK2 ///	SDK2	NM_001144952	4.02201e-05	1.10214e-05	8.41293	8.41293	CE up vs CB	0.000145899	4.42666	4.42666	CE up vs KE	38.999	17.772	1.21521	1
112978	8018438	NM_000154 // GALK1 /// ENST00000225614 // GALK1 /// BC001166 // GALK1 /// ENST00	GALK1	NM_000154	0.00108213	0.785322	1.04218	1.04218	CE up vs CB	0.00117893	2.05468	2.05468	CE up vs KE	15.4621	3.11524	0.53727	1
115082	8020793	NM_001943 // DSG2 /// ENST00000261590 // DSG2 /// BC099655 // DSG2	DSG2	NM_001943	3.39145e-05	0.787665	1.02601	1.02601	CE up vs CB	3.2912e-05	2.15302	2.15302	CE up vs KE	40.826	3.24918	0.212229	1
116823	8022750	NM_004775 // B4GALT6 /// ENST00000306851 // B4GALT6 /// AF038664 // B4GALT6 ///	B4GALT6	NM_004775	0.00319311	0.156298	1.47606	1.47606	CE up vs CB	0.00225078	2.99799	2.99799	CE up vs KE	11.0904	6.43309	1.54683	1
117602	8023623	NM_176787 // PIGN /// NM_012327 // PIGN /// ENST00000357637 // PIGN /// ENST0000	PIGN	NM_176787	0.0026318	0.0678557	1.47555	1.47555	CE up vs CB	0.000414518	2.90257	2.90257	CE up vs KE	11.7876	3.75245	0.848905	1
118766	8024917	NM_015015 // KDM4B /// ENST00000159111 // KDM4B /// BC136611 // KDM4B /// ENST00	KDM4B	NM_015015	1.08403e-06	0.0160539	2.06092	2.06092	CE up vs CB	1.26265e-05	9.53381	9.53381	CE up vs KE	100.574	53.2906	1.41297	1
119645	8025876	NM_001080503 // hCG_29977 /// ENST00000458408 // hCG_29977 /// ENST00000427879 /	hCG_29977	NM_001080503	5.28471e-05	0.294489	1.10994	1.10994	CE up vs CB	4.79169e-05	2.084	2.084	CE up vs KE	36.2311	2.9337	0.215925	1
120049	8026330	NM_213560 // PKN1 /// NM_002741 // PKN1 /// ENST00000342216 // PKN1 /// ENST0000	PKN1	NM_213560	0.000264092	0.702929	1.04493	1.04493	CE up vs CB	7.46838e-05	2.28199	2.28199	CE up vs KE	23.2535	2.69209	0.308724	1
120135	8026434	NM_173483 // CYP4F22 /// ENST00000269703 // CYP4F22 /// BC093894 // CYP4F22	CYP4F22	NM_173483	7.48788e-05	0.000482659	3.58623	3.58623	CE up vs CB	0.000405343	3.71148	3.71148	CE up vs KE	32.962	15.7859	1.2771	1
120227	8026540	NM_032855 // HSH2D /// ENST00000253680 // HSH2D /// AY319652 // HSH2D /// ENST00	HSH2D	NM_032855	4.85106e-05	0.582556	0.946377	-1.05666	CE down vs CB	4.32691e-05	2.16153	2.16153	CE up vs KE	37.0788	3.21588	0.231283	1
120619	8026965	NM_005027 // PIK3R2 /// ENST00000222254 // PIK3R2 /// BC070082 // PIK3R2 /// ENS	PIK3R2	NM_005027	0.00107593	0.246558	0.803638	-1.24434	CE down vs CB	0.00105576	2.39624	2.39624	CE up vs KE	15.4886	4.43552	0.763663	1
121280	8027716	NM_020895 // GRAMD1A /// NM_001136199 // GRAMD1A /// ENST00000317991 // GRAMD1A	GRAMD1A	NM_020895	0.00107261	0.0843512	0.71415	-1.40027	CE down vs CB	0.00161706	2.21868	2.21868	CE up vs KE	15.5028	4.24086	0.729477	1
121439	8027896	NM_015302 // HAUS5 /// ENST00000203166 // HAUS5 /// BC064390 // HAUS5 /// ENST00	HAUS5	NM_015302	0.00343568	0.83461	0.952677	-1.04967	CE down vs CB	0.00234837	2.67617	2.67617	CE up vs KE	10.8349	5.1256	1.2615	1
122368	8028907	NM_001042544 // LTBP4 /// NM_003573 // LTBP4 /// NM_001042545 // LTBP4 /// ENST0	LTBP4	NM_001042544	0.00221663	0.0361135	0.384038	-2.60391	CE down vs CB	0.0167523	3.14711	3.14711	CE up vs KE	12.4355	16.8708	3.61778	1
123573	8030255	NM_017636 // TRPM4 /// ENST00000252826 // TRPM4 /// AY297045 // TRPM4 /// AY2970	TRPM4	NM_017636	0.00138567	0.457787	0.864999	-1.15607	CE down vs CB	0.00401857	2.09872	2.09872	CE up vs KE	14.3568	4.64741	0.863218	1
123944	8030657	NM_002691 // POLD1 /// ENST00000440232 // POLD1 /// ENST00000262266 // POLD1 ///	POLD1	NM_002691	0.000450393	0.666979	1.07234	1.07234	CE up vs CB	0.000122452	2.94933	2.94933	CE up vs KE	19.9781	4.57548	0.610731	1
125721	8032695	NM_139355 // MATK /// ENST00000420907 // MATK /// ENST00000310132 // MATK /// BC	MATK	NM_139355	0.00323186	0.0533613	1.46758	1.46758	CE up vs CB	0.00182324	2.16933	2.16933	CE up vs KE	11.0479	2.97004	0.716884	1
126240	8033262	NM_000064 // C3 /// ENST00000245907 // C3 /// BC150179 // C3	C3	NM_000064	9.29119e-06	0.000736184	2.04964	2.04964	CE up vs CB	8.17468e-06	3.90865	3.90865	CE up vs KE	57.557	9.9174	0.459482	1
126927	8034006	NM_003331 // TYK2 /// ENST00000264818 // TYK2 /// BC014243 // TYK2	TYK2	NM_003331	0.00100655	0.599025	0.88985	-1.12379	CE down vs CB	0.000472631	3.34644	3.34644	CE up vs KE	15.7988	6.72522	1.13514	1
127301	8034428	NM_000528 // MAN2B1 /// ENST00000456935 // MAN2B1 /// BC000736 // MAN2B1 /// ENS	MAN2B1	NM_000528	0.000196387	0.428649	0.894221	-1.11829	CE down vs CB	0.000220434	2.34358	2.34358	CE up vs KE	25.2684	4.25638	0.449192	1
127448	8034587	NM_001105578 // SYCE2 /// ENST00000293695 // SYCE2 /// AK302373 // SYCE2	SYCE2	NM_001105578	0.00108511	0.073273	1.38047	1.38047	CE up vs CB	0.000215057	2.7108	2.7108	CE up vs KE	15.4494	3.54222	0.611409	1
127894	8035075	NM_052890 // PGLYRP2 /// ENST00000340880 // PGLYRP2 /// AK055882 // PGLYRP2 ///	PGLYRP2	NM_052890	2.83714e-05	8.94502e-06	10.2095	10.2095	CE up vs CB	0.000473847	3.76269	3.76269	CE up vs KE	42.8232	21.9564	1.36726	1
127922	8035107	NM_021187 // CYP4F11 /// NM_001128932 // CYP4F11 /// ENST00000402119 // CYP4F11	CYP4F11	NM_021187	1.27187e-06	0.00486161	1.44965	1.44965	CE up vs CB	1.30772e-06	3.43479	3.43479	CE up vs KE	96.5199	8.39922	0.232055	1
128293	8035513	NM_004750 // CRLF1 /// ENST00000392386 // CRLF1 /// AF073515 // CRLF1	CRLF1	NM_004750	0.00235857	0.519095	1.11763	1.11763	CE up vs CB	0.00136119	2.20575	2.20575	CE up vs KE	12.198	3.1073	0.679303	1
129319	8036679	NM_148169 // FBXO17 /// NM_024907 // FBXO17 /// AF386743 // FBXO17 /// ENST00000	FBXO17	NM_148169	0.000737958	0.60528	1.09537	1.09537	CE up vs CB	0.000202129	2.97196	2.97196	CE up vs KE	17.3135	4.65031	0.716253	1
129329	8036691	NM_178820 // FBXO27 /// ENST00000292853 // FBXO27 /// BC014527 // FBXO27	FBXO27	NM_178820	0.00039457	0.45525	0.871222	-1.14781	CE down vs CB	0.000207856	3.0815	3.0815	CE up vs KE	20.7498	5.99879	0.770936	1
129457	8036838	NM_024877 // CNTD2 /// ENST00000430325 // CNTD2 /// ENST00000221818 // CNTD2 ///	CNTD2	NM_024877	0.00299594	0.00208142	2.27812	2.27812	CE up vs CB	0.00237037	2.23759	2.23759	CE up vs KE	11.3165	3.59502	0.847145	1
129546	8036940	NM_024876 // ADCK4 /// NM_001142555 // ADCK4 /// ENST00000324464 // ADCK4 /// EN	ADCK4	NM_024876	1.89379e-05	0.207443	0.846707	-1.18105	CE down vs CB	5.95111e-05	2.53343	2.53343	CE up vs KE	47.6903	6.57501	0.36765	1
129607	8037010	NM_000660 // TGFB1 /// ENST00000221930 // TGFB1 /// AK291907 // TGFB1	TGFB1	NM_000660	7.85838e-07	0.831666	1.0166	1.0166	CE up vs CB	6.73915e-07	2.84575	2.84575	CE up vs KE	109.242	5.74729	0.140294	1
129692	8037108	NM_002088 // GRIK5 /// ENST00000262895 // GRIK5 /// AJ249209 // GRIK5 /// ENST00	GRIK5	NM_002088	0.00208107	0.000831866	3.41513	3.41513	CE up vs CB	0.000634335	3.60159	3.60159	CE up vs KE	12.6807	6.64984	1.39842	1
130080	8037545	NM_000400 // ERCC2 /// ENST00000391942 // ERCC2 /// ENST00000391945 // ERCC2 ///	ERCC2	NM_000400	0.00272476	0.775325	0.926979	-1.07877	CE down vs CB	0.00183324	3.23127	3.23127	CE up vs KE	11.6599	7.20305	1.64737	1
130555	8038070	NM_018273 // TMEM143 /// ENST00000293261 // TMEM143 /// BC040021 // TMEM143 ///	TMEM143	NM_018273	0.000706865	0.99316	1.00138	1.00138	CE up vs CB	0.000749112	2.28095	2.28095	CE up vs KE	17.5329	4.0101	0.609915	1
132458	8040227	NM_001034 // RRM2 /// ENST00000360566 // RRM2 /// ENST00000304567 // RRM2 /// S4	RRM2	NM_001034	1.32785e-06	0.0225464	1.18559	1.18559	CE up vs CB	1.45868e-06	2.14321	2.14321	CE up vs KE	95.4546	3.26184	0.0911244	1
132576	8040360	NM_145693 // LPIN1 /// ENST00000256720 // LPIN1 /// BC030537 // LPIN1 /// AK2902	LPIN1	NM_145693	0.000131859	0.0617398	1.26601	1.26601	CE up vs CB	2.23725e-05	2.59376	2.59376	CE up vs KE	28.2241	3.12094	0.294873	1
132771	8040594	NM_014971 // EFR3B /// ENST00000403714 // EFR3B /// BC049384 // EFR3B /// ENST00	EFR3B	NM_014971	0.0002202	0.020247	0.63457	-1.57587	CE down vs CB	0.000546972	2.39266	2.39266	CE up vs KE	24.4722	5.68275	0.619235	1
133183	8041040	NM_004899 // BRE /// NM_199194 // BRE /// NM_199191 // BRE /// NM_199193 // BRE	BRE	NM_004899	8.04293e-05	0.773541	0.968114	-1.03294	CE down vs CB	7.35951e-05	2.24688	2.24688	CE up vs KE	32.3257	3.58815	0.296	1
133320	8041186	NM_024692 // CLIP4 /// ENST00000404424 // CLIP4 /// ENST00000320081 // CLIP4 ///	CLIP4	NM_024692	0.000642826	0.0705488	0.580565	-1.72246	CE down vs CB	0.000992516	3.72931	3.72931	CE up vs KE	18.0255	11.481	1.69849	1
133394	8041270	NM_017964 // SLC30A6 /// ENST00000282587 // SLC30A6 /// BC032525 // SLC30A6 ///	SLC30A6	NM_017964	0.000242894	0.949736	1.00771	1.00771	CE up vs CB	0.000118715	2.2719	2.2719	CE up vs KE	23.8076	3.11099	0.348459	1
133755	8041662	NM_172069 // PLEKHH2 /// ENST00000282406 // PLEKHH2 /// AL833546 // PLEKHH2 ///	PLEKHH2	NM_172069	0.0018758	0.813861	1.08523	1.08523	CE up vs CB	0.00101779	5.41753	5.41753	CE up vs KE	13.0927	13.8528	2.82149	1
134342	8042317	NM_003038 // SLC1A4 /// NM_001135581 // SLC1A4 /// ENST00000234256 // SLC1A4 ///	SLC1A4	NM_003038	0.00096269	0.107943	1.46407	1.46407	CE up vs CB	0.000216915	3.82284	3.82284	CE up vs KE	16.0091	6.65393	1.10836	1
134673	8042687	NM_001130987 // DYSF /// NM_001130977 // DYSF /// NM_001130978 // DYSF /// NM_00	DYSF	NM_001130987	0.000635803	0.00115056	2.37042	2.37042	CE up vs CB	0.000310256	2.87795	2.87795	CE up vs KE	18.0832	5.1924	0.765703	1
134769	8042795	NM_001615 // ACTG2 /// ENST00000345517 // ACTG2 /// ENST00000409624 // ACTG2 ///	ACTG2	NM_001615	6.89824e-05	0.943747	1.01518	1.01518	CE up vs CB	4.09521e-05	5.3134	5.3134	CE up vs KE	33.7061	13.5176	1.06945	1
135423	8043567	NM_016044 // FAHD2A /// ENST00000233379 // FAHD2A /// ENST00000447036 // FAHD2A	FAHD2A	NM_016044	4.22548e-05	0.165268	1.19747	1.19747	CE up vs CB	1.9418e-05	2.87313	2.87313	CE up vs KE	38.4846	5.02023	0.347861	1
136349	8044592	NM_012455 // PSD4 /// ENST00000245796 // PSD4 /// ENST00000418251 // PSD4 /// EN	PSD4	NM_012455	0.00171604	0.044758	0.616071	-1.62319	CE down vs CB	0.00545357	2.15673	2.15673	CE up vs KE	13.4544	5.23334	1.03725	1
136364	8044608	NR_015377 // LOC654433	LOC654433	NR_015377	0.000451791	0.339385	1.22422	1.22422	CE up vs CB	0.000936313	2.75781	2.75781	CE up vs KE	19.9604	7.41301	0.990364	1
136954	8045294	NM_080386 // TUBA3D /// NM_207312 // TUBA3E /// ENST00000312988 // TUBA3E /// BC	TUBA3D	NM_080386	5.7741e-05	1.47801e-05	5.48868	5.48868	CE up vs CB	0.00301245	2.15946	2.15946	CE up vs KE	35.3731	11.1523	0.840734	1
136975	8045317	NM_138770 // CCDC74A /// NM_207310 // CCDC74B /// ENST00000295171 // CCDC74A ///	CCDC74A	NM_138770	0.000350533	0.718258	0.945261	-1.05791	CE down vs CB	0.000222784	2.59844	2.59844	CE up vs KE	21.4619	4.55889	0.566448	1
136982	8045327	NM_013310 // C2orf27A /// ENST00000409278 // C2orf27A /// ENST00000355171 // C2o	C2orf27A	NM_013310	0.00137653	0.94846	0.988383	-1.01175	CE down vs CB	0.000596732	2.60574	2.60574	CE up vs KE	14.3855	4.13525	0.766557	1
137950	8046412	NM_002610 // PDK1 /// ENST00000282077 // PDK1 /// ENST00000410055 // PDK1 /// DQ	PDK1	NM_002610	0.000521097	0.366453	1.1452	1.1452	CE up vs CB	0.000301738	2.35984	2.35984	CE up vs KE	19.1568	3.59889	0.500974	1
138030	8046496	NM_031942 // CDCA7 /// NM_145810 // CDCA7 /// ENST00000347703 // CDCA7 /// ENST0	CDCA7	NM_031942	0.000481844	0.000138572	4.17297	4.17297	CE up vs CB	0.00597146	2.18078	2.18078	CE up vs KE	19.5942	8.11314	1.10416	1
138560	8047083	NM_017694 // MFSD6 /// ENST00000392328 // MFSD6 /// ENST00000281416 // MFSD6 ///	MFSD6	NM_017694	2.68765e-05	0.106387	0.842847	-1.18645	CE down vs CB	7.29278e-05	2.01332	2.01332	CE up vs KE	43.4468	3.59428	0.220608	1
138919	8047491	NM_003507 // FZD7 /// ENST00000286201 // FZD7 /// AB017365 // FZD7	FZD7	NM_003507	0.000633769	0.79387	1.05335	1.05335	CE up vs CB	0.00363928	2.18332	2.18332	CE up vs KE	18.1001	6.27438	0.924396	1
139624	8048271	NM_015488 // PNKD /// NM_022572 // PNKD /// ENST00000273077 // PNKD /// ENST0000	PNKD	NM_015488	0.000242715	0.5861	0.931592	-1.07343	CE down vs CB	0.000364709	2.08778	2.08778	CE up vs KE	23.8126	3.48022	0.389735	1
139928	8048600	NM_013335 // GMPPA /// NM_205847 // GMPPA /// ENST00000313597 // GMPPA /// ENST0	GMPPA	NM_013335	6.25257e-05	0.0285897	1.21753	1.21753	CE up vs CB	1.00888e-05	2.05789	2.05789	CE up vs KE	34.6179	1.76882	0.136255	1
141232	8050043	NM_015025 // MYT1L /// ENST00000428368 // MYT1L /// AF036943 // MYT1L /// BC1502	MYT1L	NM_015025	0.00109818	0.0117517	2.02096	2.02096	CE up vs CB	0.000269666	3.80271	3.80271	CE up vs KE	15.3943	6.76933	1.17261	1
141338	8050161	---		---	2.98004e-05	0.0606708	0.682152	-1.46595	CE down vs CB	3.54065e-05	4.23642	4.23642	CE up vs KE	42.2643	12.1643	0.767503	1
141348	8050171	NM_138799 // MBOAT2 /// ENST00000305997 // MBOAT2 /// BC146871 // MBOAT2	MBOAT2	NM_138799	0.000147732	0.244422	0.850404	-1.17591	CE down vs CB	0.000188697	2.31165	2.31165	CE up vs KE	27.3505	4.26134	0.41548	1
141680	8050536	NM_001006657 // WDR35 /// NM_020779 // WDR35 /// ENST00000345530 // WDR35 /// EN	WDR35	NM_001006657	0.00101393	0.00027565	5.49058	5.49058	CE up vs CB	0.000960672	4.08053	4.08053	CE up vs KE	15.7645	11.3427	1.91868	1
142381	8051303	NM_024572 // GALNT14 /// ENST00000349752 // GALNT14 /// AB078144 // GALNT14 ///	GALNT14	NM_024572	0.000436694	0.287914	1.33243	1.33243	CE up vs CB	0.0042187	2.70914	2.70914	CE up vs KE	20.156	12.0005	1.58768	1
143344	8052362	NM_004105 // EFEMP1 /// NM_001039348 // EFEMP1 /// NM_001039349 // EFEMP1 /// EN	EFEMP1	NM_004105	1.37082e-05	0.0134662	0.760748	-1.3145	CE down vs CB	2.04214e-05	2.15857	2.15857	CE up vs KE	51.9513	3.65188	0.187452	1
143844	8052926	NM_144582 // TEX261 /// ENST00000272438 // TEX261 /// AY358783 // TEX261 /// ENS	TEX261	NM_144582	1.04424e-07	0.677327	0.981537	-1.01881	CE down vs CB	1.79407e-07	2.04289	2.04289	CE up vs KE	182.864	3.19109	0.046535	1
144667	8053876	NM_001002036 // ASTL /// ENST00000342380 // ASTL /// BC107127 // ASTL	ASTL	NM_001002036	0.000742231	0.347751	1.20362	1.20362	CE up vs CB	0.000464645	2.8734	2.8734	CE up vs KE	17.2842	5.58894	0.862281	1
144828	8054052	---		---	0.00232656	0.51005	1.16986	1.16986	CE up vs CB	0.00472373	2.4139	2.4139	CE up vs KE	12.25	5.94123	1.29333	1
145219	8054482	NM_005434 // MALL /// ENST00000272462 // MALL /// BC003179 // MALL /// ENST00000	MALL	NM_005434	6.94732e-05	0.477433	1.11488	1.11488	CE up vs CB	0.000178282	2.60093	2.60093	CE up vs KE	33.6412	6.70825	0.53175	1
147193	8056681	NM_004525 // LRP2 /// ENST00000263816 // LRP2 /// U33837 // LRP2 /// ENST0000044	LRP2	NM_004525	0.000509526	0.211985	0.736183	-1.35836	CE down vs CB	0.000405084	3.70473	3.70473	CE up vs KE	19.2813	9.20663	1.2733	1
147320	8056831	NM_004882 // CIR1 /// ENST00000342016 // CIR1 /// BC046098 // CIR1 /// U03644 //	CIR1	NM_004882	0.000762719	0.720351	0.92491	-1.08119	CE down vs CB	0.00100444	2.88716	2.88716	CE up vs KE	17.1468	7.1139	1.10635	1
147349	8056862	NM_003387 // WIPF1 /// NM_001077269 // WIPF1 /// ENST00000272746 // WIPF1 /// EN	WIPF1	NM_003387	3.45604e-06	0.0128278	1.28697	1.28697	CE up vs CB	1.0162e-05	2.16476	2.16476	CE up vs KE	74.5263	4.36943	0.156345	1
147380	8056895	NM_001822 // CHN1 /// NM_001025201 // CHN1 /// ENST00000409156 // CHN1 /// ENST0	CHN1	NM_001822	0.000390564	0.509894	1.09541	1.09541	CE up vs CB	0.000368997	2.17551	2.17551	CE up vs KE	20.8104	3.40305	0.43607	1
148167	8057733	NM_001142645 // TMEM194B /// ENST00000409150 // TMEM194B /// AK296987 // TMEM194	TMEM194B	NM_001142645	0.000614022	0.00417399	1.78557	1.78557	CE up vs CB	0.000134548	2.71512	2.71512	CE up vs KE	18.2675	3.66606	0.535166	1
148734	8058351	NM_138468 // ICA1L /// ENST00000392237 // ICA1L /// BC063876 // ICA1L /// uc002u	ICA1L	NM_138468	0.00178319	0.486288	1.14871	1.14871	CE up vs CB	0.00058834	2.83122	2.83122	CE up vs KE	13.2974	4.49394	0.901214	1
149103	8058767	NM_212482 // FN1 /// NM_212475 // FN1 /// NM_002026 // FN1 /// NM_212478 // FN1	FN1	NM_212482	0.000281881	0.0366845	1.31591	1.31591	CE up vs CB	9.9211e-05	2.18439	2.18439	CE up vs KE	22.8298	2.56921	0.300101	1
149189	8058858	NM_000599 // IGFBP5 /// ENST00000233813 // IGFBP5	IGFBP5	NM_000599	3.75179e-05	0.0771668	0.825262	-1.21174	CE down vs CB	3.97549e-05	2.15495	2.15495	CE up vs KE	39.7347	3.33962	0.224127	1
149440	8059131	NM_005689 // ABCB6 /// ENST00000265316 // ABCB6 /// AF308472 // ABCB6 /// ENST00	ABCB6	NM_005689	0.00121496	0.696488	1.05683	1.05683	CE up vs CB	0.000813116	2.03789	2.03789	CE up vs KE	14.936	2.61271	0.466471	1
149461	8059153	NM_001077198 // ATG9A /// NM_024085 // ATG9A /// ENST00000409618 // ATG9A /// EN	ATG9A	NM_001077198	8.97898e-06	0.41495	1.07162	1.07162	CE up vs CB	7.29604e-06	2.27278	2.27278	CE up vs KE	58.0762	3.52099	0.161672	1
150182	8059948	NM_004369 // COL6A3 /// NM_057164 // COL6A3 /// NM_057165 // COL6A3 /// NM_05716	COL6A3	NM_004369	0.000991907	0.649836	0.868185	-1.15183	CE down vs CB	0.00173498	3.9811	3.9811	CE up vs KE	15.8677	13.3538	2.24419	1
150352	8060140	NM_004321 // KIF1A /// ENST00000320389 // KIF1A /// AB290172 // KIF1A /// ENST00	KIF1A	NM_004321	0.00159179	0.098411	1.40888	1.40888	CE up vs CB	0.000245243	3.14575	3.14575	CE up vs KE	13.7661	4.33289	0.839335	1
150716	8060542	NM_022575 // VPS16 /// NM_080413 // VPS16 /// ENST00000380445 // VPS16 /// ENST0	VPS16	NM_022575	0.000497366	0.00239672	1.86512	1.86512	CE up vs CB	8.76997e-05	2.81767	2.81767	CE up vs KE	19.4161	3.70846	0.509332	1
150763	8060589	NM_002836 // PTPRA /// NM_080840 // PTPRA /// NM_080841 // PTPRA /// ENST0000038	PTPRA	NM_002836	2.05509e-05	0.793929	1.02435	1.02435	CE up vs CB	4.12558e-05	2.05082	2.05082	CE up vs KE	46.6661	3.46794	0.19817	1
151222	8061105	NM_002594 // PCSK2 /// ENST00000262545 // PCSK2 /// BC040546 // PCSK2 /// ENST00	PCSK2	NM_002594	5.47761e-09	0.000290179	0.751186	-1.33123	CE down vs CB	2.21517e-08	2.7564	2.7564	CE up vs KE	385.302	7.9444	0.054983	1
151727	8061679	NM_002110 // HCK /// ENST00000262651 // HCK /// ENST00000375862 // HCK /// AK290	HCK	NM_002110	0.000997831	0.00240922	2.37605	2.37605	CE up vs CB	0.000377912	3.20002	3.20002	CE up vs KE	15.8397	5.8425	0.983605	1
152201	8062193	NM_003116 // SPAG4 /// ENST00000374273 // SPAG4 /// AF262992 // SPAG4 /// ENST00	SPAG4	NM_003116	0.0013177	0.415379	1.12937	1.12937	CE up vs CB	0.00113974	2.01229	2.01229	CE up vs KE	14.5762	2.73919	0.501126	1
153521	8063676	NM_000516 // GNAS /// NM_080426 // GNAS /// NM_001077489 // GNAS /// ENST0000026	GNAS	NM_000516	0.00329935	0.00976736	1.65766	1.65766	CE up vs CB	0.000658626	2.24146	2.24146	CE up vs KE	10.9756	2.31043	0.56135	1
154673	8064940	ENST00000246024 // TMX4	TMX4	ENST00000246024	0.00122231	0.819795	1.0549	1.0549	CE up vs CB	0.00257968	2.66065	2.66065	CE up vs KE	14.9091	7.19758	1.28737	1
154849	8065139	NM_001042576 // RRBP1 /// NM_004587 // RRBP1 /// ENST00000377807 // RRBP1 /// EN	RRBP1	NM_001042576	3.56115e-06	0.149634	1.135	1.135	CE up vs CB	4.69592e-06	2.36255	2.36255	CE up vs KE	73.9482	4.37217	0.157666	1
154895	8065188	NM_021220 // OVOL2 /// ENST00000278780 // OVOL2 /// AK022284 // OVOL2	OVOL2	NM_021220	0.00270429	0.0548811	1.52504	1.52504	CE up vs CB	0.00379389	2.1317	2.1317	CE up vs KE	11.6875	3.86376	0.88157	1
155357	8065731	NM_003908 // EIF2S2 /// ENST00000374980 // EIF2S2	EIF2S2	NM_003908	0.000992373	0.429078	1.19034	1.19034	CE up vs CB	0.00328207	2.37445	2.37445	CE up vs KE	15.8655	6.5036	1.09312	1
155927	8066366	NM_133170 // PTPRT /// NM_007050 // PTPRT /// ENST00000373198 // PTPRT /// ENST0	PTPRT	NM_133170	0.00155629	0.0909574	0.522404	-1.91423	CE down vs CB	0.00957826	3.13898	3.13898	CE up vs KE	13.8608	14.8302	2.85316	1
155985	8066433	NM_000022 // ADA /// ENST00000372874 // ADA /// BC040226 // ADA	ADA	NM_000022	0.000569638	0.261224	1.35287	1.35287	CE up vs CB	0.000715083	3.77678	3.77678	CE up vs KE	18.6696	10.9297	1.56114	1
156630	8067147	NM_000782 // CYP24A1 /// NM_001128915 // CYP24A1 /// ENST00000395955 // CYP24A1	CYP24A1	NM_000782	5.54423e-05	0.000678552	1.6305	1.6305	CE up vs CB	2.87096e-05	2.16703	2.16703	CE up vs KE	35.7643	2.78784	0.207868	1
156663	8067187	NM_001719 // BMP7 /// ENST00000395863 // BMP7 /// BC008584 // BMP7 /// M60316 //	BMP7	NM_001719	1.28249e-08	0.0339308	0.853034	-1.17229	CE down vs CB	1.88745e-08	3.94422	3.94422	CE up vs KE	310.922	11.2751	0.0967027	1
156965	8067515	BC137326 // C20orf151 /// NM_080833 // C20orf151 /// ENST00000252998 // C20orf15	C20orf151	BC137326	0.000485091	0.0158398	0.603863	-1.656	CE down vs CB	0.00193031	2.11483	2.11483	CE up vs KE	19.5564	5.01228	0.683465	1
157085	8067648	NM_172107 // KCNQ2 /// NM_172106 // KCNQ2 /// NM_004518 // KCNQ2 /// NM_172108 /	KCNQ2	NM_172107	0.00243569	0.624764	1.22456	1.22456	CE up vs CB	0.00422608	4.82593	4.82593	CE up vs KE	12.0764	17.9451	3.96259	1
157173	8067744	ENST00000245663 // ZBTB46	ZBTB46	ENST00000245663	0.00139474	0.46028	0.87456	-1.14343	CE down vs CB	0.000779851	2.47474	2.47474	CE up vs KE	14.3286	4.00763	0.745853	1
157592	8068246	NM_207585 // IFNAR2 /// NM_000874 // IFNAR2 /// NM_207584 // IFNAR2 /// CR541817	IFNAR2	NM_207585	0.00244043	0.182306	1.38521	1.38521	CE up vs CB	0.00929937	2.13745	2.13745	CE up vs KE	12.0691	5.62773	1.24345	1
157889	8068576	NR_026841 // DSCR8 /// NR_026842 // DSCR8 /// NR_026839 // DSCR8 /// NR_026838 /	DSCR8	NR_026841	2.27738e-06	0.187331	0.890598	-1.12284	CE down vs CB	2.10322e-06	2.62932	2.62932	CE up vs KE	83.0404	5.02242	0.161284	1
157945	8068640	NM_006057 // B3GALT5 /// NM_033170 // B3GALT5 /// NM_033171 // B3GALT5 /// NM_03	B3GALT5	NM_006057	0.000157153	0.00558178	2.18632	2.18632	CE up vs CB	0.000918674	2.89898	2.89898	CE up vs KE	26.8857	10.9258	1.08368	1
158076	8068785	NM_016818 // ABCG1 /// NM_207174 // ABCG1 /// NM_004915 // ABCG1 /// NM_207627 /	ABCG1	NM_016818	4.96043e-05	0.00257716	0.568639	-1.75859	CE down vs CB	0.000274446	2.23697	2.23697	CE up vs KE	36.8563	5.91917	0.42827	1
158135	8068848	NM_002606 // PDE9A /// NM_001001575 // PDE9A /// NM_001001576 // PDE9A /// NM_00	PDE9A	NM_002606	9.72848e-06	0.0352319	0.724536	-1.38019	CE down vs CB	1.26534e-05	3.34294	3.34294	CE up vs KE	56.8654	8.63649	0.405003	1
158508	8069256	NM_020528 // PCBP3 /// NM_001130141 // PCBP3 /// ENST00000400314 // PCBP3 /// EN	PCBP3	NM_020528	0.00110854	0.84763	1.04376	1.04376	CE up vs CB	0.000469757	3.40026	3.40026	CE up vs KE	15.3512	6.69602	1.16317	1
159551	8070417	NR_026543 // C21orf88 /// ENST00000329618 // C21orf88	C21orf88	NR_026543	4.18737e-05	0.000177262	2.20792	2.20792	CE up vs CB	5.52215e-05	2.54804	2.54804	CE up vs KE	38.5786	5.27314	0.364495	1
159667	8070540	NM_015500 // C2CD2 /// NM_199050 // C2CD2 /// ENST00000380486 // C2CD2 /// ENST0	C2CD2	NM_015500	0.00092702	0.989393	0.997238	-1.00277	CE down vs CB	0.00039853	3.23036	3.23036	CE up vs KE	16.1891	6.16675	1.01579	1
159706	8070585	NM_024022 // TMPRSS3 /// NR_027348 // TMPRSS3 /// ENST00000291532 // TMPRSS3 ///	TMPRSS3	NM_024022	0.00266516	0.00160508	6.29751	6.29751	CE up vs CB	0.0973315	2.09565	2.09565	CE up vs KE	11.7411	17.0834	3.88002	1
160652	8071675	NM_002073 // GNAZ /// ENST00000248996 // GNAZ /// BC026342 // GNAZ	GNAZ	NM_002073	0.00105433	0.235415	1.22768	1.22768	CE up vs CB	0.00109665	2.2127	2.2127	CE up vs KE	15.5824	3.73085	0.638472	1
160656	8071680	NM_004914 // RAB36 /// ENST00000263116 // RAB36 /// AB023061 // RAB36 /// ENST00	RAB36	NM_004914	0.00208216	0.0163153	1.99043	1.99043	CE up vs CB	0.000277461	4.03359	4.03359	CE up vs KE	12.6786	6.12967	1.28924	1
160893	8071940	NM_005265 // GGT1 /// NM_013430 // GGT1 /// NM_001032364 // GGT1 /// NM_00103236	GGT1	NM_005265	1.20362e-05	0.959463	0.988705	-1.01142	CE down vs CB	5.54845e-06	9.89926	9.89926	CE up vs KE	53.7658	23.6259	1.17179	1
161249	8072337	NM_012429 // SEC14L2 /// NM_033382 // SEC14L2 /// CR456571 // SEC14L2 /// AK3037	SEC14L2	NM_012429	0.000441282	0.000139617	3.59629	3.59629	CE up vs CB	0.00438095	2.09666	2.09666	CE up vs KE	20.0957	6.69299	0.888151	1
161621	8072756	NM_000631 // NCF4 /// NM_013416 // NCF4 /// ENST00000248899 // NCF4 /// ENST0000	NCF4	NM_000631	0.00339898	0.998245	1.00048	1.00048	CE up vs CB	0.00160218	2.70591	2.70591	CE up vs KE	10.8721	4.62635	1.13474	1
161857	8073021	NM_006855 // KDELR3 /// ENST00000216014 // KDELR3 /// BC001277 // KDELR3	KDELR3	NM_006855	6.12884e-07	0.488314	0.942392	-1.06113	CE down vs CB	2.29146e-06	2.64242	2.64242	CE up vs KE	116.435	7.2767	0.166655	1
162338	8073551	NM_145733 // SEPT3 /// NM_019106 // SEPT3 /// ENST00000396426 // SEPT3 /// ENST0	2010-09-03	NM_145733	0.00267159	0.297483	1.28614	1.28614	CE up vs CB	0.00118948	3.02577	3.02577	CE up vs KE	11.7322	5.60365	1.27368	1
162372	8073590	NR_027786 // SERHL /// NM_014509 // SERHL2 /// ENST00000327678 // SERHL2 /// AK2	SERHL	NR_027786	2.79712e-06	0.00292915	0.725674	-1.37803	CE down vs CB	7.47861e-06	2.16721	2.16721	CE up vs KE	78.7333	4.26439	0.144433	1
162844	8074110	NM_012324 // MAPK8IP2 /// ENST00000329492 // MAPK8IP2 /// ENST00000399912 // MAP	MAPK8IP2	NM_012324	0.000378866	0.564323	1.14586	1.14586	CE up vs CB	0.000212716	4.24508	4.24508	CE up vs KE	20.9918	10.0834	1.28094	1
164209	8075661	NM_005368 // MB /// NM_203377 // MB /// NM_203378 // MB /// ENST00000359787 // M	MB	NM_005368	0.00023499	0.286368	0.83108	-1.20325	CE down vs CB	0.000398429	2.56478	2.56478	CE up vs KE	24.0299	5.90532	0.655329	1
164867	8076405	NM_000262 // NAGA /// ENST00000396398 // NAGA /// ENST00000403363 // NAGA /// EN	NAGA	NM_000262	2.89057e-08	0.376005	1.0384	1.0384	CE up vs CB	3.70112e-08	2.25682	2.25682	CE up vs KE	253.217	3.83346	0.0403707	1
165225	8076805	NM_022766 // CERK /// ENST00000216264 // CERK /// AB079066 // CERK /// ENST00000	CERK	NM_022766	0.0001003	0.00406908	0.504846	-1.9808	CE down vs CB	0.000706311	2.49646	2.49646	CE up vs KE	30.4312	8.41157	0.737101	1
165560	8077162	NM_000487 // ARSA /// NM_001085425 // ARSA /// NM_001085426 // ARSA /// NM_00108	ARSA	NM_000487	0.00263954	0.977551	0.995575	-1.00444	CE down vs CB	0.00121449	2.1093	2.1093	CE up vs KE	11.7767	2.57337	0.582701	1
165785	8077408	NM_001099952 // ITPR1 /// NM_002222 // ITPR1 /// L38019 // ITPR1 /// D26070 // I	ITPR1	NM_001099952	0.00246747	0.699895	1.1127	1.1127	CE up vs CB	0.00494018	2.79114	2.79114	CE up vs KE	12.0276	8.04505	1.78368	1
165870	8077498	NM_014583 // LMCD1 /// ENST00000157600 // LMCD1 /// AF169284 // LMCD1 /// BC0006	LMCD1	NM_014583	0.000291482	0.00649845	1.72906	1.72906	CE up vs CB	0.000870181	2.16687	2.16687	CE up vs KE	22.6147	4.76829	0.562265	1
166296	8077965	NM_024827 // HDAC11 /// NM_001136041 // HDAC11 /// ENST00000295757 // HDAC11 ///	HDAC11	NM_024827	0.0012575	0.00418154	1.81205	1.81205	CE up vs CB	0.00132215	2.06191	2.06191	CE up vs KE	14.7826	3.12131	0.56306	1
166990	8078734	NM_002468 // MYD88 /// U84408 // MYD88 /// AB446470 // MYD88 /// BT007376 // MYD	MYD88	NM_002468	0.000131817	0.741084	0.96525	-1.036	CE down vs CB	8.93399e-05	2.11275	2.11275	CE up vs KE	28.2266	2.82569	0.266953	1
167074	8078824	NM_005107 // EXOG /// NM_001145464 // EXOG /// ENST00000287675 // EXOG /// ENST0	EXOG	NM_005107	0.000716148	0.00740888	1.82434	1.82434	CE up vs CB	0.000732675	2.44597	2.44597	CE up vs KE	17.4662	4.66776	0.712655	1
167680	8079500	NM_015175 // NBEAL2 /// ENST00000450053 // NBEAL2 /// AK301269 // NBEAL2 /// AY3	NBEAL2	NM_015175	4.83439e-05	0.11724	1.19879	1.19879	CE up vs CB	2.4661e-05	2.44482	2.44482	CE up vs KE	37.1133	3.70788	0.266419	1
167805	8079636	NM_015933 // CCDC72 /// ENST00000438607 // CCDC72 /// BC066333 // CCDC72	CCDC72	NM_015933	0.000414818	0.196012	0.798019	-1.2531	CE down vs CB	0.00113878	2.20267	2.20267	CE up vs KE	20.455	4.90066	0.638887	1
167856	8079692	NM_177939 // P4HTM /// NM_177938 // P4HTM /// ENST00000383729 // P4HTM /// ENST0	P4HTM	NM_177939	0.000224996	0.784275	0.971191	-1.02966	CE down vs CB	9.55736e-05	2.09573	2.09573	CE up vs KE	24.3248	2.42884	0.266267	1
168064	8079918	NM_004186 // SEMA3F /// ENST00000002829 // SEMA3F /// BC042914 // SEMA3F /// U38	SEMA3F	NM_004186	8.55364e-05	0.17176	0.83197	-1.20197	CE down vs CB	6.28451e-05	2.53929	2.53929	CE up vs KE	31.7869	4.4721	0.375174	1
168123	8079982	NM_004636 // SEMA3B /// NM_001005914 // SEMA3B /// ENST00000414456 // SEMA3B ///	SEMA3B	NM_004636	0.00103981	0.00968763	2.49058	2.49058	CE up vs CB	0.0197324	2.1926	2.1926	CE up vs KE	15.6469	10.7019	1.8239	1
168476	8080360	NM_015136 // STAB1 /// ENST00000321725 // STAB1 /// AB052956 // STAB1	STAB1	NM_015136	0.000605363	0.00045248	2.50376	2.50376	CE up vs CB	0.00223655	2.0354	2.0354	CE up vs KE	18.343	4.44855	0.646719	1
168890	8080801	NM_017771 // PXK /// ENST00000356151 // PXK /// AY274811 // PXK /// ENST00000302	PXK	NM_017771	0.00118207	0.0605979	1.43195	1.43195	CE up vs CB	0.000483644	2.53117	2.53117	CE up vs KE	15.0594	3.81606	0.675736	1
169031	8080966	BC127733 // GLT8D4 /// NM_001080393 // GLT8D4 /// ENST00000389617 // GLT8D4	GLT8D4	BC127733	0.00276086	0.211149	1.34475	1.34475	CE up vs CB	0.000639625	3.24983	3.24983	CE up vs KE	11.6118	5.16496	1.18614	1
169159	8081125	NM_182896 // ARL13B /// NM_144996 // ARL13B /// ENST00000335438 // ARL13B /// EN	ARL13B	NM_182896	0.000127108	0.00153759	1.6139	1.6139	CE up vs CB	0.00013156	2.0075	2.0075	CE up vs KE	28.5115	2.7674	0.258834	1
169372	8081381	NM_001134456 // FAM55C /// NM_145037 // FAM55C /// ENST00000273347 // FAM55C ///	FAM55C	NM_001134456	4.69147e-05	0.342817	0.900835	-1.11008	CE down vs CB	8.6233e-05	2.1236	2.1236	CE up vs KE	37.415	3.75902	0.267916	1
169737	8081782	NM_173570 // ZDHHC23 /// ENST00000330212 // ZDHHC23 /// BC035230 // ZDHHC23 ///	ZDHHC23	NM_173570	5.45951e-05	0.0855628	1.28124	1.28124	CE up vs CB	1.9398e-05	3.09726	3.09726	CE up vs KE	35.9136	5.37396	0.399028	1
169810	8081865	NR_024265 // KTELC1 /// NM_152305 // KTELC1 /// ENST00000295588 // KTELC1 /// AY	KTELC1	NR_024265	0.000422578	0.0696371	1.27167	1.27167	CE up vs CB	0.000258171	2.03859	2.03859	CE up vs KE	20.3467	2.51144	0.329152	1
170137	8082222	NM_001024660 // KALRN /// NM_007064 // KALRN /// ENST00000360013 // KALRN /// EN	KALRN	NM_001024660	0.000458405	0.0288809	0.493625	-2.02583	CE down vs CB	0.00112958	3.71715	3.71715	CE up vs KE	19.8772	13.1307	1.76158	1
170431	8082550	NM_052985 // IFT122 /// NM_052989 // IFT122 /// NM_018262 // IFT122 /// NM_05299	IFT122	NM_052985	1.04911e-06	0.029402	0.827321	-1.20872	CE down vs CB	2.79048e-06	2.29371	2.29371	CE up vs KE	101.425	4.87272	0.128114	1
170882	8083047	NM_022131 // CLSTN2 /// ENST00000458420 // CLSTN2 /// AY753303 // CLSTN2 /// ENS	CLSTN2	NM_022131	1.80565e-05	0.137747	0.822049	-1.21647	CE down vs CB	0.00010953	2.30514	2.30514	CE up vs KE	48.2973	6.38751	0.352678	1
170917	8083087	NM_152282 // ACPL2 /// NM_001037172 // ACPL2 /// ENST00000393010 // ACPL2 /// EN	ACPL2	NM_152282	0.00148577	0.941587	1.01313	1.01313	CE up vs CB	0.000995064	2.38733	2.38733	CE up vs KE	14.0572	3.91654	0.742975	1
170980	8083159	NM_001145319 // PLS1 /// NM_002670 // PLS1 /// ENST00000457734 // PLS1 /// ENST0	PLS1	NM_001145319	1.61733e-05	0.0931636	0.843132	-1.18605	CE down vs CB	3.02117e-05	2.125	2.125	CE up vs KE	49.728	3.73446	0.200261	1
170995	8083176	NM_003304 // TRPC1 /// ENST00000351106 // TRPC1 /// ENST00000273482 // TRPC1 ///	TRPC1	NM_003304	0.000909567	0.685304	0.917326	-1.09013	CE down vs CB	0.0005636	3.10257	3.10257	CE up vs KE	16.2804	6.42663	1.05266	1
171179	8083383	NM_053002 // MED12L /// ENST00000273432 // MED12L /// AF399708 // MED12L	MED12L	NM_053002	0.00122987	0.896962	1.03571	1.03571	CE up vs CB	0.00222897	3.1897	3.1897	CE up vs KE	14.8815	9.60261	1.72072	1
171293	8083513	NM_000902 // MME /// NM_007287 // MME /// NM_007288 // MME /// NM_007289 // MME	MME	NM_000902	2.82074e-06	0.0190931	0.75277	-1.32843	CE down vs CB	4.41601e-06	2.88231	2.88231	CE up vs KE	78.5617	6.92827	0.23517	1
171803	8084095	NM_002492 // NDUFB5 /// ENST00000259037 // NDUFB5 /// BC017909 // NDUFB5	NDUFB5	NM_002492	6.16099e-06	0.229783	0.905894	-1.10388	CE down vs CB	1.22683e-05	2.06163	2.06163	CE up vs KE	64.1012	3.46976	0.144345	1
172843	8085257	NM_207351 // PRRT3 /// ENST00000412055 // PRRT3 /// BC040508 // PRRT3 /// uc003b	PRRT3	NM_207351	0.000377942	0.12758	0.702274	-1.42394	CE down vs CB	0.00172963	2.60851	2.60851	CE up vs KE	21.0064	8.50545	1.07973	1
173141	8085587	NM_005677 // COLQ /// NM_080538 // COLQ /// NM_080539 // COLQ /// NM_080541 // C	COLQ	NM_005677	0.000333983	5.10319e-05	5.7258	5.7258	CE up vs CB	0.00329902	2.51074	2.51074	CE up vs KE	21.759	10.1262	1.24101	1
173508	8085990	NM_017784 // OSBPL10 /// ENST00000273142 // OSBPL10 /// ENST00000396555 // OSBPL	OSBPL10	NM_017784	0.00287841	0.56578	1.08346	1.08346	CE up vs CB	0.000687944	2.04555	2.04555	CE up vs KE	11.4604	1.92258	0.447357	1
173811	8086324	NM_031899 // GORASP1 /// ENST00000319283 // GORASP1 /// BC008928 // GORASP1 ///	GORASP1	NM_031899	0.00273585	0.224671	0.694426	-1.44004	CE down vs CB	0.00991184	2.53841	2.53841	CE up vs KE	11.645	8.37675	1.91824	1
173964	8086500	NM_020696 // KIAA1143 /// ENST00000296121 // KIAA1143 /// BC008468 // KIAA1143	KIAA1143	NM_020696	0.000409612	0.951339	1.00859	1.00859	CE up vs CB	0.00051015	2.13953	2.13953	CE up vs KE	20.529	3.5467	0.460707	1
174218	8086778	NM_012235 // SCAP /// ENST00000265565 // SCAP /// ENST00000339815 // SCAP /// EN	SCAP	NM_012235	0.000553003	0.63395	0.937472	-1.0667	CE down vs CB	0.000362461	2.15864	2.15864	CE up vs KE	18.8305	3.00171	0.425084	1
174372	8086942	NM_002673 // PLXNB1 /// NM_001130082 // PLXNB1 /// ENST00000296440 // PLXNB1 ///	PLXNB1	NM_002673	0.00192217	0.570165	1.16078	1.16078	CE up vs CB	0.00143244	3.31323	3.31323	CE up vs KE	12.9948	7.71858	1.58393	1
174715	8087305	NM_005051 // QARS /// ENST00000306125 // QARS /// BC001567 // QARS /// BC000394	QARS	NM_005051	0.000468117	0.801728	1.03673	1.03673	CE up vs CB	0.000498873	2.18303	2.18303	CE up vs KE	19.7578	3.57202	0.482107	1
174818	8087415	NM_001664 // RHOA /// ENST00000418115 // RHOA /// ENST00000265538 // RHOA /// BX	RHOA	NM_001664	1.32892e-08	0.995771	1.00023	1.00023	CE up vs CB	2.24995e-08	2.46719	2.46719	CE up vs KE	308.143	5.06024	0.0437912	1
175720	8088401	NM_003500 // ACOX2 /// ENST00000302819 // ACOX2 /// BC047700 // ACOX2	ACOX2	NM_003500	0.000101666	0.0155618	2.19198	2.19198	CE up vs CB	0.000231391	5.03668	5.03668	CE up vs KE	30.3184	18.6681	1.64196	1
175770	8088454	AK296111 // C3orf67 /// BC050317 // C3orf67 /// AK124111 // C3orf67 /// ENST0000	C3orf67	AK296111	0.00257045	0.998427	0.999405	-1.0006	CE down vs CB	0.0205871	2.32258	2.32258	CE up vs KE	11.8749	9.53798	2.14187	1
175985	8088695	NM_173654 // C3orf64 /// ENST00000295571 // C3orf64 /// AK304102 // C3orf64 ///	C3orf64	NM_173654	1.80665e-06	0.701163	1.03577	1.03577	CE up vs CB	1.24354e-06	3.12147	3.12147	CE up vs KE	88.1645	6.44364	0.194898	1
176049	8088763	NM_015123 // FRMD4B /// ENST00000398540 // FRMD4B	FRMD4B	NM_015123	0.000558395	0.000185741	2.67876	2.67876	CE up vs CB	0.000347737	2.45484	2.45484	CE up vs KE	18.7777	4.0268	0.571855	1
176327	8089092	NM_080927 // DCBLD2 /// ENST00000326840 // DCBLD2 /// AB073146 // DCBLD2 /// ENS	DCBLD2	NM_080927	5.34067e-07	0.0247318	1.15399	1.15399	CE up vs CB	9.1672e-07	2.00599	2.00599	CE up vs KE	120.615	3.04529	0.0673283	1
177218	8090081	NM_183357 // ADCY5 /// ENST00000309879 // ADCY5 /// AK294565 // ADCY5 /// ENST00	ADCY5	NM_183357	1.72416e-05	0.174594	1.14842	1.14842	CE up vs CB	4.72738e-05	2.08537	2.08537	CE up vs KE	48.8923	3.95108	0.215499	1
177681	8090598	NM_015103 // PLXND1 /// ENST00000324093 // PLXND1 /// AY116661 // PLXND1 /// ENS	PLXND1	NM_015103	6.75474e-08	0.208397	0.928164	-1.0774	CE down vs CB	2.75619e-07	2.34724	2.34724	CE up vs KE	204.242	5.67767	0.0741299	1
177906	8090843	NM_001005861 // RYK /// NM_002958 // RYK /// ENST00000296084 // RYK /// ENST0000	RYK	NM_001005861	3.56099e-07	0.196648	1.08072	1.08072	CE up vs CB	4.5913e-07	2.24402	2.24402	CE up vs KE	133.79	3.80677	0.0758754	1
178660	8091688	NM_024621 // VEPH1 /// ENST00000362010 // VEPH1 /// ENST00000392832 // VEPH1 ///	VEPH1	NM_024621	0.00149268	0.373839	0.787318	-1.27014	CE down vs CB	0.00433653	2.71453	2.71453	CE up vs KE	14.0374	8.47487	1.60996	1
178902	8091961	NM_014498 // GOLIM4 /// ENST00000309027 // GOLIM4 /// U55853 // GOLIM4	GOLIM4	NM_014498	5.75977e-05	0.0167089	1.39154	1.39154	CE up vs CB	0.000165046	2.06729	2.06729	CE up vs KE	35.3969	3.98401	0.30014	1
179004	8092076	NM_020390 // EIF5A2 /// ENST00000295822 // EIF5A2 /// AY205261 // EIF5A2	EIF5A2	NM_020390	4.82407e-07	0.000731043	1.42726	1.42726	CE up vs CB	9.42083e-07	2.45302	2.45302	CE up vs KE	123.797	5.2303	0.112664	1
179278	8092388	NM_015078 // MCF2L2 /// ENST00000328913 // MCF2L2 /// ENST00000447025 // MCF2L2	MCF2L2	NM_015078	0.00162925	0.00460422	2.07678	2.07678	CE up vs CB	0.0010124	2.57299	2.57299	CE up vs KE	13.669	4.51699	0.881213	1
179606	8092755	NM_021032 // FGF12 /// NM_004113 // FGF12 /// ENST00000454309 // FGF12 /// ENST0	FGF12	NM_021032	0.000111928	0.313766	0.805876	-1.24089	CE down vs CB	7.76701e-05	4.40087	4.40087	CE up vs KE	29.5281	11.1498	1.00693	1
179716	8092876	NM_024524 // ATP13A3 /// ENST00000439040 // ATP13A3 /// ENST00000256031 // ATP13	ATP13A3	NM_024524	0.00239091	0.0447351	1.37637	1.37637	CE up vs CB	0.000763327	2.02789	2.02789	CE up vs KE	12.1464	2.05428	0.451005	1
180163	8093382	NM_000283 // PDE6B /// NM_001145291 // PDE6B /// NM_001145292 // PDE6B /// ENST0	PDE6B	NM_000283	0.00214186	0.114824	0.640316	-1.56173	CE down vs CB	0.00542378	2.58906	2.58906	CE up vs KE	12.5683	7.47387	1.58576	1
180913	8094213	NM_001080522 // CC2D2A /// NM_020785 // CC2D2A /// ENST00000389652 // CC2D2A ///	CC2D2A	NM_001080522	0.000621462	0.0459206	1.41636	1.41636	CE up vs CB	8.89383e-05	2.90838	2.90838	CE up vs KE	18.2037	3.70759	0.543127	1
181019	8094329	NM_004787 // SLIT2 /// ENST00000273739 // SLIT2 /// AF133270 // SLIT2 /// ENST00	SLIT2	NM_004787	9.7085e-05	0.0229211	0.543757	-1.83906	CE down vs CB	0.000180236	4.13394	4.13394	CE up vs KE	30.7042	13.5402	1.17597	1
181242	8094579	NM_015173 // TBC1D1 /// ENST00000261439 // TBC1D1 /// BC050321 // TBC1D1 /// AB4	TBC1D1	NM_015173	0.00296485	0.134139	1.2799	1.2799	CE up vs CB	0.000669831	2.21466	2.21466	CE up vs KE	11.3539	2.33154	0.547606	1
181424	8094783	NM_004181 // UCHL1 /// ENST00000284440 // UCHL1 /// BC006305 // UCHL1 /// BC0051	UCHL1	NM_004181	0.00172316	0.664484	0.88818	-1.1259	CE down vs CB	0.00456135	2.79116	2.79116	CE up vs KE	13.4374	8.72986	1.73245	1
181450	8094810	NM_014988 // LIMCH1 /// NM_001112717 // LIMCH1 /// NM_001112718 // LIMCH1 /// NM	LIMCH1	NM_014988	0.000190424	0.963707	1.01434	1.01434	CE up vs CB	6.36012e-05	9.992	9.992	CE up vs KE	25.4868	21.9504	2.29665	1
181746	8095147	NM_024592 // SRD5A3 /// ENST00000264228 // SRD5A3	SRD5A3	NM_024592	0.000303713	0.301829	0.864035	-1.15736	CE down vs CB	0.000520131	2.09458	2.09458	CE up vs KE	22.3532	3.67097	0.437935	1
181931	8095363	---		---	8.73902e-09	0.123386	0.942512	-1.06099	CE down vs CB	1.61397e-08	2.16734	2.16734	CE up vs KE	342.51	3.79278	0.0295293	1
181944	8095378	---		---	8.73902e-09	0.123386	0.942512	-1.06099	CE down vs CB	1.61397e-08	2.16734	2.16734	CE up vs KE	342.51	3.79278	0.0295293	1
182869	8096408	NM_014606 // HERC3 /// ENST00000402738 // HERC3 /// ENST00000264345 // HERC3 ///	HERC3	NM_014606	4.57826e-05	0.0783675	0.818246	-1.22213	CE down vs CB	4.26328e-05	2.22128	2.22128	CE up vs KE	37.6622	3.4873	0.246918	1
183466	8097085	NM_133477 // SYNPO2 /// ENST00000307142 // SYNPO2 /// AL833547 // SYNPO2 /// ENS	SYNPO2	NM_133477	4.49809e-06	0.724182	0.970495	-1.0304	CE down vs CB	1.03813e-05	2.21988	2.21988	CE up vs KE	69.5869	4.3749	0.167652	1
183804	8097456	NM_032961 // PCDH10 /// ENST00000264360 // PCDH10	PCDH10	NM_032961	2.44737e-07	0.000665158	0.608577	-1.64318	CE down vs CB	4.94563e-07	3.82617	3.82617	CE up vs KE	147.23	11.7701	0.213183	1
184570	8098336	NM_017423 // GALNT7 /// ENST00000265000 // GALNT7 /// BC047468 // GALNT7 /// ENS	GALNT7	NM_017423	1.46757e-08	0.995269	0.999687	-1.00031	CE down vs CB	2.14748e-08	3.03839	3.03839	CE up vs KE	300.52	7.38561	0.0655362	1
184853	8098651	NM_207352 // CYP4V2 /// ENST00000378802 // CYP4V2 /// AY422002 // CYP4V2 /// ENS	CYP4V2	NM_207352	0.000572796	0.136463	1.26364	1.26364	CE up vs CB	0.000428375	2.25469	2.25469	CE up vs KE	18.6397	3.48875	0.499113	1
186045	8099986	NM_173075 // APBB2 /// ENST00000295974 // APBB2 /// AK304247 // APBB2 /// ENST00	APBB2	NM_173075	0.00126835	0.367622	1.14324	1.14324	CE up vs CB	0.000273195	2.36928	2.36928	CE up vs KE	14.7445	2.71435	0.490915	1
187139	8101229	NM_144571 // CNOT6L /// ENST00000264903 // CNOT6L	CNOT6L	NM_144571	0.000808714	0.26938	1.26042	1.26042	CE up vs CB	0.00231539	2.35449	2.35449	CE up vs KE	16.8544	6.00461	0.950035	1
188615	8102881	NM_004362 // CLGN /// NM_001130675 // CLGN /// ENST00000414773 // CLGN /// ENST0	CLGN	NM_004362	0.00141016	0.0643271	0.5679	-1.76087	CE down vs CB	0.0220988	2.11083	2.11083	CE up vs KE	14.2811	9.3116	1.73873	1
188892	8103186	NM_001009555 // SH3D19 /// NM_001128923 // SH3D19 /// ENST00000304527 // SH3D19	SH3D19	NM_001009555	0.00220655	0.0391627	1.44349	1.44349	CE up vs CB	0.000307267	2.46258	2.46258	CE up vs KE	12.453	2.59148	0.554935	1
189327	8103690	NM_017867 // C4orf27 /// ENST00000393381 // C4orf27 /// BC010367 // C4orf27	C4orf27	NM_017867	0.00173543	0.901083	1.03206	1.03206	CE up vs CB	0.00253888	2.89537	2.89537	CE up vs KE	13.4083	7.5981	1.51113	1
189343	8103709	NM_016228 // AADAT /// NM_182662 // AADAT /// ENST00000353187 // AADAT /// ENST0	AADAT	NM_016228	0.00171125	0.470419	1.14599	1.14599	CE up vs CB	0.000738963	2.58874	2.58874	CE up vs KE	13.4659	4.08055	0.808077	1
189814	8104247	NM_004237 // TRIP13 /// ENST00000166345 // TRIP13 /// BC019294 // TRIP13	TRIP13	NM_004237	1.23479e-05	0.0753021	1.19751	1.19751	CE up vs CB	4.74573e-05	2.00895	2.00895	CE up vs KE	53.4044	3.89258	0.19437	1
189930	8104375	NM_001047 // SRD5A1 /// ENST00000274192 // SRD5A1 /// AF052126 // SRD5A1	SRD5A1	NM_001047	5.36298e-08	0.719334	0.979671	-1.02075	CE down vs CB	2.10311e-07	2.44625	2.44625	CE up vs KE	216.544	6.17233	0.0760102	1
190403	8104921	NM_005983 // SKP2 /// NM_032637 // SKP2 /// ENST00000274255 // SKP2 /// ENST0000	SKP2	NM_005983	0.00283729	0.06618	1.49219	1.49219	CE up vs CB	0.00516045	2.0488	2.0488	CE up vs KE	11.5124	3.82082	0.885029	1
190786	8105349	NM_001008397 // GPX8 /// ENST00000296734 // GPX8 /// BC029424 // GPX8	GPX8	NM_001008397	0.000248996	0.502444	1.0985	1.0985	CE up vs CB	0.000669531	2.0511	2.0511	CE up vs KE	23.6421	3.96266	0.446961	1
193105	8107915	NM_003059 // SLC22A4 /// ENST00000200652 // SLC22A4 /// BC028313 // SLC22A4	SLC22A4	NM_003059	3.56977e-05	0.184891	1.17589	1.17589	CE up vs CB	2.31338e-05	2.65165	2.65165	CE up vs KE	40.2688	4.70425	0.311523	1
193465	8108315	NM_005733 // KIF20A /// ENST00000394894 // KIF20A /// BC012999 // KIF20A	KIF20A	NM_005733	0.00165915	0.195485	0.793802	-1.25976	CE down vs CB	0.00185424	2.10679	2.10679	CE up vs KE	13.5935	3.40258	0.667491	1
193794	8108677	NM_018900 // PCDHA1 /// NM_031411 // PCDHA1 /// NM_018901 // PCDHA10 /// NM_0318	PCDHA1	NM_018900	0.000200565	0.791709	1.04025	1.04025	CE up vs CB	7.53209e-05	2.9183	2.9183	CE up vs KE	25.1202	4.91231	0.521473	1
193825	8108718	NM_020957 // PCDHB16 /// ENST00000361016 // PCDHB16 /// BC036062 // PCDHB16	PCDHB16	NM_020957	4.45524e-06	0.492973	0.951737	-1.05071	CE down vs CB	6.88897e-06	2.03009	2.03009	CE up vs KE	69.7607	3.09809	0.118427	1
193831	8108726	NM_018930 // PCDHB10 /// ENST00000239446 // PCDHB10 /// AY358720 // PCDHB10	PCDHB10	NM_018930	8.99218e-07	0.269792	0.918454	-1.08879	CE down vs CB	1.36884e-06	2.49184	2.49184	CE up vs KE	105.526	5.0877	0.128568	1
193844	8108742	NM_018933 // PCDHB13 /// AF217745 // PCDHB13 /// AK296151 // PCDHB13 /// uc003lj	PCDHB13	NM_018933	8.20963e-05	0.0419815	0.726271	-1.3769	CE down vs CB	0.000109095	2.53488	2.53488	CE up vs KE	32.1452	5.2676	0.436984	1
193849	8108748	NM_018934 // PCDHB14 /// ENST00000239449 // PCDHB14 /// AK074555 // PCDHB14	PCDHB14	NM_018934	0.00147769	0.500006	0.883088	-1.13239	CE down vs CB	0.000976717	2.43676	2.43676	CE up vs KE	14.0804	4.08566	0.773777	1
194182	8109109	NM_014945 // ABLIM3 /// ENST00000309868 // ABLIM3 /// AK225769 // ABLIM3 /// ENS	ABLIM3	NM_014945	0.00268968	0.16628	0.714761	-1.39907	CE down vs CB	0.00311778	2.50858	2.50858	CE up vs KE	11.7074	5.33149	1.21438	1
194226	8109156	NM_024028 // PCYOX1L /// ENST00000274569 // PCYOX1L /// AK127281 // PCYOX1L	PCYOX1L	NM_024028	3.64982e-05	0.115774	1.21417	1.21417	CE up vs CB	0.000107831	2.17056	2.17056	CE up vs KE	40.0298	4.53857	0.302346	1
194405	8109356	NM_078483 // SLC36A1 /// ENST00000243389 // SLC36A1 /// AY227113 // SLC36A1 ///	SLC36A1	NM_078483	0.00165946	0.623708	0.900858	-1.11005	CE down vs CB	0.00110316	2.76111	2.76111	CE up vs KE	13.5927	5.3322	1.04609	1
194712	8109711	NM_004060 // CCNG1 /// NM_199246 // CCNG1 /// ENST00000340828 // CCNG1 /// ENST0	CCNG1	NM_004060	2.61876e-06	0.0211161	0.81915	-1.22078	CE down vs CB	7.40477e-06	2.03419	2.03419	CE up vs KE	80.0898	3.64678	0.121423	1
194747	8109751	NM_001002 // RPLP0 /// NM_053275 // RPLP0 /// ENST00000228306 // RPLP0 /// ENST0	RPLP0	NM_001002	1.39224e-07	0.466239	0.962282	-1.0392	CE down vs CB	4.26937e-07	2.10426	2.10426	CE up vs KE	169.973	4.02116	0.0630871	1
194892	8109907	NM_012188 // FOXI1 /// NM_144769 // FOXI1 /// ENST00000306268 // FOXI1 /// ENST0	FOXI1	NM_012188	0.00128295	0.864162	1.0476	1.0476	CE up vs CB	0.000587919	4.22986	4.22986	CE up vs KE	14.6939	9.53397	1.73024	1
194918	8109936	NM_014211 // GABRP /// ENST00000393840 // GABRP /// ENST00000265294 // GABRP ///	GABRP	NM_014211	0.000311563	0.320958	1.22979	1.22979	CE up vs CB	0.000185352	3.57342	3.57342	CE up vs KE	22.1922	7.94475	0.954659	1
195184	8110236	NM_012171 // TSPAN17 /// NM_130465 // TSPAN17 /// NM_001006616 // TSPAN17 /// EN	TSPAN17	NM_012171	0.000379238	0.0572841	1.25619	1.25619	CE up vs CB	7.62019e-05	2.1397	2.1397	CE up vs KE	20.9859	2.07694	0.263916	1
195833	8110967	NM_199133 // FAM173B /// ENST00000280330 // FAM173B /// AK055604 // FAM173B	FAM173B	NM_199133	0.000103332	0.95881	0.99384	-1.0062	CE down vs CB	9.24471e-05	2.30448	2.30448	CE up vs KE	30.1834	3.80089	0.335803	1
196063	8111225	NM_004934 // CDH18 /// ENST00000382275 // CDH18 /// ENST00000274170 // CDH18 ///	CDH18	NM_004934	0.00223605	0.00835889	0.373446	-2.67776	CE down vs CB	0.0349164	2.05138	2.05138	CE up vs KE	12.4019	9.32282	2.0046	1
196478	8111678	NM_001127671 // LIFR /// NM_002310 // LIFR /// ENST00000453190 // LIFR /// ENST0	LIFR	NM_001127671	0.000206407	0.0402289	1.24133	1.24133	CE up vs CB	3.24271e-05	2.08963	2.08963	CE up vs KE	24.9194	1.82418	0.195209	1
196689	8111902	NM_000436 // OXCT1 /// ENST00000196371 // OXCT1 /// U62961 // OXCT1	OXCT1	NM_000436	0.000549	0.598625	0.934539	-1.07005	CE down vs CB	0.000462234	2.01844	2.01844	CE up vs KE	18.8701	2.69731	0.381174	1
197146	8112420	NM_019072 // SGTB /// ENST00000381007 // SGTB /// AF368281 // SGTB	SGTB	NM_019072	0.00013187	0.0820352	1.43856	1.43856	CE up vs CB	0.000827614	2.58638	2.58638	CE up vs KE	28.2234	8.84529	0.83574	1
197474	8112813	NM_000046 // ARSB /// NM_198709 // ARSB /// ENST00000264914 // ARSB /// ENST0000	ARSB	NM_000046	0.00164678	0.576501	1.14071	1.14071	CE up vs CB	0.000406369	3.70998	3.70998	CE up vs KE	13.6245	6.5259	1.27728	1
197613	8112975	NM_001884 // HAPLN1 /// ENST00000274341 // HAPLN1 /// BC057808 // HAPLN1	HAPLN1	NM_001884	7.77943e-05	0.00435773	0.578512	-1.72857	CE down vs CB	0.000412643	2.23785	2.23785	CE up vs KE	32.6207	5.92588	0.484427	1
197747	8113135	NM_024717 // MCTP1 /// NM_001002796 // MCTP1 /// ENST00000312216 // MCTP1 /// EN	MCTP1	NM_024717	0.00330933	0.00938761	2.17844	2.17844	CE up vs CB	0.00463885	2.43585	2.43585	CE up vs KE	10.965	5.39205	1.31133	1
198059	8113493	NM_139164 // STARD4 /// ENST00000296632 // STARD4	STARD4	NM_139164	0.0029297	0.963586	0.981954	-1.01838	CE down vs CB	0.00800863	3.87868	3.87868	CE up vs KE	11.3967	15.9558	3.73343	1
198069	8113505	NM_004772 // C5orf13 /// NM_001142482 // C5orf13 /// NM_001142483 // C5orf13 ///	C5orf13	NM_004772	1.32475e-05	0.223084	0.881078	-1.13497	CE down vs CB	1.39263e-05	2.45168	2.45168	CE up vs KE	52.4224	4.51137	0.229488	1
198905	8114437	NM_001790 // CDC25C /// NM_022809 // CDC25C /// ENST00000348983 // CDC25C /// EN	CDC25C	NM_001790	0.000803157	0.223839	0.821164	-1.21778	CE down vs CB	0.00079437	2.18439	2.18439	CE up vs KE	16.8886	3.53254	0.557778	1
199274	8114849	NM_182960 // PRELID2 /// NM_205846 // PRELID2 /// NM_138492 // PRELID2 /// ENST0	PRELID2	NM_182960	0.003318	0.990374	1.00373	1.00373	CE up vs CB	0.0068786	2.94179	2.94179	CE up vs KE	10.9559	9.16598	2.231	1
199771	8115400	NM_032385 // C5orf4 /// ENST00000326080 // C5orf4 /// ENST00000423554 // C5orf4	C5orf4	NM_032385	0.000482657	0.00429778	2.27477	2.27477	CE up vs CB	0.000270596	3.61597	3.61597	CE up vs KE	19.5847	7.98304	1.08698	1
200017	8115671	NM_145266 // NUDCD2 /// ENST00000302764 // NUDCD2 /// BX538290 // NUDCD2	NUDCD2	NM_145266	0.000373343	0.417457	1.14522	1.14522	CE up vs CB	0.000450186	2.47277	2.47277	CE up vs KE	21.0799	4.96684	0.628318	1
200299	8115993	NM_016290 // UIMC1 /// ENST00000377227 // UIMC1 /// AF349313 // UIMC1 /// ENST00	UIMC1	NM_016290	0.000941215	0.0835345	1.38589	1.38589	CE up vs CB	0.00185389	2.12279	2.12279	CE up vs KE	16.1164	4.11618	0.681073	1
200479	8116189	NM_153373 // AGXT2L2 /// ENST00000308158 // AGXT2L2 /// BC037567 // AGXT2L2 ///	AGXT2L2	NM_153373	1.8887e-05	0.615807	0.954626	-1.04753	CE down vs CB	1.96075e-05	2.21327	2.21327	CE up vs KE	47.7244	3.53712	0.197642	1
200926	8116695	NM_003913 // PRPF4B /// ENST00000337659 // PRPF4B	PRPF4B	NM_003913	0.000365717	0.000333253	3.33428	3.33428	CE up vs CB	0.000179637	3.74088	3.74088	CE up vs KE	21.2043	8.07283	1.01524	1
201393	8117231	NM_015895 // GMNN /// ENST00000378059 // GMNN /// ENST00000230056 // GMNN /// EN	GMNN	NM_015895	8.81191e-06	0.0228119	1.27601	1.27601	CE up vs CB	4.32734e-05	2.00286	2.00286	CE up vs KE	58.3634	4.11021	0.187798	1
201542	8117400	NM_003522 // HIST1H2BF /// BC056264 // HIST1H2BF	HIST1H2BF	NM_003522	0.00262293	0.276015	0.821567	-1.21719	CE down vs CB	0.00290759	2.03356	2.03356	CE up vs KE	11.8	3.12356	0.705888	1
201894	8117831	NM_170783 // ZNRD1 /// NM_014596 // ZNRD1 /// ENST00000376782 // ZNRD1 /// ENST0	ZNRD1	NM_170783	8.93271e-05	0.000802678	1.91409	1.91409	CE up vs CB	0.000166478	2.27724	2.27724	CE up vs KE	31.4123	4.55145	0.386384	1
202157	8118122	NM_005931 // MICB /// ENST00000252229 // MICB /// ENST00000451603 // MICB /// AK	MICB	NM_005931	2.54448e-09	2.88979e-07	1.86145	1.86145	CE up vs CB	8.71164e-08	2.06389	2.06389	CE up vs KE	467.333	6.9739	0.0397941	1
202289	8118271	NM_025259 // MSH5 /// NM_172165 // MSH5 /// NM_002441 // MSH5 /// NM_172166 // M	MSH5	NM_025259	0.0033177	0.0108373	1.7288	1.7288	CE up vs CB	0.000750925	2.39808	2.39808	CE up vs KE	10.9562	2.82163	0.686765	1
202914	8118953	NM_006238 // PPARD /// NM_177435 // PPARD /// ENST00000360694 // PPARD /// ENST0	PPARD	NM_006238	9.60302e-07	0.353895	0.915067	-1.09282	CE down vs CB	6.01661e-07	3.58661	3.58661	CE up vs KE	103.758	7.90562	0.203181	1
203127	8119192	NM_003958 // RNF8 /// NM_183078 // RNF8 /// ENST00000373479 // RNF8 /// ENST0000	RNF8	NM_003958	0.000262427	0.0819236	1.28956	1.28956	CE up vs CB	0.000456489	2.07161	2.07161	CE up vs KE	23.295	3.5673	0.408363	1
203857	8119985	NM_001078177 // SLC29A1 /// NM_001078175 // SLC29A1 /// NM_001078176 // SLC29A1	SLC29A1	NM_001078177	0.00213743	0.0254757	1.96017	1.96017	CE up vs CB	0.00514916	2.55113	2.55113	CE up vs KE	12.5764	7.11048	1.50769	1
204234	8120409	NM_004282 // BAG2 /// ENST00000370693 // BAG2 /// AF095192 // BAG2	BAG2	NM_004282	0.000534124	0.0152766	1.52473	1.52473	CE up vs CB	0.000549477	2.13825	2.13825	CE up vs KE	19.0206	3.35656	0.470585	1
204524	8120724	NM_133493 // CD109 /// NM_001159587 // CD109 /// ENST00000287097 // CD109 /// AF	CD109	NM_133493	5.65816e-05	0.519425	1.10366	1.10366	CE up vs CB	0.000476387	2.28955	2.28955	CE up vs KE	35.5679	7.13777	0.535146	1
204753	8120973	NM_002526 // NT5E /// ENST00000257770 // NT5E /// BC065937 // NT5E /// ENST00000	NT5E	NM_002526	0.000197692	0.0176784	0.637938	-1.56755	CE down vs CB	0.000559567	2.30171	2.30171	CE up vs KE	25.2217	5.38559	0.569414	1
205134	8121425	NM_003080 // SMPD2 /// ENST00000258052 // SMPD2 /// BC000038 // SMPD2 /// ENST00	SMPD2	NM_003080	0.00295258	0.357235	1.22531	1.22531	CE up vs CB	0.00304795	2.38933	2.38933	CE up vs KE	11.3687	4.60682	1.08058	1
205757	8122124	NM_006208 // ENPP1 /// ENST00000360971 // ENPP1 /// BC059375 // ENPP1 /// ENST00	ENPP1	NM_006208	7.61259e-07	0.000356728	0.679809	-1.471	CE down vs CB	3.72439e-06	2.0717	2.0717	CE up vs KE	110.137	4.39555	0.106426	1
205944	8122342	NM_021243 // C6orf115 /// ENST00000367660 // C6orf115 /// BC014953 // C6orf115	C6orf115	NM_021243	2.5749e-09	0.278322	0.955699	-1.04635	CE down vs CB	4.65308e-09	2.78926	2.78926	CE up vs KE	465.937	6.62386	0.0379099	1
206296	8122730	NM_025218 // ULBP1 /// ENST00000229708 // ULBP1 /// ENST00000367345 // ULBP1 ///	ULBP1	NM_025218	0.000142339	0.945451	0.982936	-1.01736	CE down vs CB	0.00191811	3.01913	3.01913	CE up vs KE	27.6336	15.3825	1.48443	1
207228	8123768	NM_003144 // SSR1 /// ENST00000244763 // SSR1 /// ENST00000397511 // SSR1 /// AF	SSR1	NM_003144	9.03148e-09	0.117743	1.06848	1.06848	CE up vs CB	4.36046e-08	2.11553	2.11553	CE up vs KE	339.679	4.54362	0.0356699	1
207783	8124399	NM_005319 // HIST1H1C /// ENST00000343677 // HIST1H1C /// AK290947 // HIST1H1C	HIST1H1C	NM_005319	1.46632e-05	0.412943	1.07791	1.07791	CE up vs CB	1.58508e-05	2.22235	2.22235	CE up vs KE	51.0346	3.60693	0.188469	1
207816	8124441	---		---	4.99382e-07	0.00434801	0.74891	-1.33527	CE down vs CB	1.24151e-06	2.58031	2.58031	CE up vs KE	122.706	6.21636	0.135095	1
207817	8124442	---		---	2.27248e-05	0.0278399	0.697374	-1.43395	CE down vs CB	5.26704e-05	2.85028	2.85028	CE up vs KE	45.4344	7.68565	0.451091	1
207818	8124443	NM_003534 // HIST1H3G	HIST1H3G	NM_003534	0.00010692	0.0383135	0.728157	-1.37333	CE down vs CB	0.000252933	2.21924	2.21924	CE up vs KE	29.9019	4.59534	0.409814	1
207821	8124447	---		---	4.30538e-10	3.50257e-05	0.830915	-1.20349	CE down vs CB	8.51567e-10	2.08011	2.08011	CE up vs KE	730.297	3.44953	0.0125959	1
207849	8124485	---		---	0.00324234	0.76407	0.882443	-1.13322	CE down vs CB	0.0186141	3.27156	3.27156	CE up vs KE	11.0366	16.7628	4.05023	1
207850	8124486	BC014312 // HIST1H2BJ	HIST1H2BJ	BC014312	4.19981e-06	0.739596	0.968333	-1.0327	CE down vs CB	9.72487e-06	2.50452	2.50452	CE up vs KE	70.8418	5.80059	0.218349	1
208456	8125179	NM_006709 // EHMT2 /// NM_025256 // EHMT2 /// ENST00000375537 // EHMT2 /// ENST0	EHMT2	NM_006709	0.00136131	0.94494	0.989661	-1.01045	CE down vs CB	0.000941425	2.10081	2.10081	CE up vs KE	14.4339	2.87539	0.531229	1
209402	8126220	NM_005943 // MOCS1 /// NM_005942 // MOCS1 /// NM_138928 // MOCS1 /// NM_00107509	MOCS1	NM_005943	8.75459e-05	0.349246	0.856122	-1.16806	CE down vs CB	0.000135958	2.89965	2.89965	CE up vs KE	31.5858	7.22262	0.609778	1
210003	8126888	NM_000324 // RHAG /// ENST00000371175 // RHAG /// BC012605 // RHAG /// ENST00000	RHAG	NM_000324	0.00019088	0.0343833	0.71207	-1.40436	CE down vs CB	0.000364401	2.19468	2.19468	CE up vs KE	25.4698	4.24349	0.44429	1
211873	8128959	NM_002037 // FYN /// NM_153047 // FYN /// NM_153048 // FYN /// ENST00000368678 /	FYN	NM_002037	0.00215835	0.306066	1.32502	1.32502	CE up vs CB	0.000510494	4.22625	4.22625	CE up vs KE	12.5385	7.78063	1.65477	1
212938	8130135	NM_198887 // NUP43 /// ENST00000340413 // NUP43 /// AK074311 // NUP43 /// ENST00	NUP43	NM_198887	1.9736e-07	0.00128234	1.31589	1.31589	CE up vs CB	6.22401e-07	2.22346	2.22346	CE up vs KE	155.528	4.67926	0.0802301	1
213003	8130210	---		---	4.86149e-06	0.868055	0.986226	-1.01397	CE down vs CB	7.64484e-06	2.27034	2.27034	CE up vs KE	68.1918	4.17526	0.163275	1
213891	8131194	NM_025250 // TTYH3 /// ENST00000258796 // TTYH3 /// BC152447 // TTYH3 /// ENST00	TTYH3	NM_025250	3.55403e-07	0.785769	0.982993	-1.0173	CE down vs CB	3.44681e-07	2.53091	2.53091	CE up vs KE	133.857	4.66842	0.093003	1
213911	8131217	NM_152744 // SDK1 /// ENST00000404826 // SDK1 /// AY310398 // SDK1 /// ENST00000	SDK1	NM_152744	0.000289868	0.536201	1.10439	1.10439	CE up vs CB	0.000232611	2.63285	2.63285	CE up vs KE	22.6502	5.00802	0.589607	1
214562	8131940	NM_016447 // MPP6 /// ENST00000222644 // MPP6 /// ENST00000396475 // MPP6 /// BC	MPP6	NM_016447	0.00141688	0.00157946	2.86045	2.86045	CE up vs CB	0.00280624	2.59544	2.59544	CE up vs KE	14.2606	6.73247	1.25894	1
214643	8132032	NM_175887 // PRR15 /// ENST00000319694 // PRR15 /// BC029131 // PRR15	PRR15	NM_175887	0.000186578	0.00801692	0.57697	-1.73319	CE down vs CB	0.000930886	2.22561	2.22561	CE up vs KE	25.6323	5.90985	0.614834	1
214854	8132266	NM_133468 // BMPER /// ENST00000297161 // BMPER /// ENST00000426693 // BMPER ///	BMPER	NM_133468	6.10964e-05	9.80266e-06	5.85153	5.85153	CE up vs CB	0.000104459	3.57678	3.57678	CE up vs KE	34.8357	10.5849	0.81027	1
215235	8132689	NM_021116 // ADCY1 /// ENST00000297323 // ADCY1	ADCY1	NM_021116	0.00149319	0.0413921	1.45877	1.45877	CE up vs CB	0.00185566	2.03209	2.03209	CE up vs KE	14.036	3.18197	0.604537	1
216124	8133734	NM_001110354 // ZP3 /// NM_007155 // ZP3 /// ENST00000336517 // ZP3 /// ENST0000	ZP3	NM_001110354	0.000351182	0.235391	1.26529	1.26529	CE up vs CB	0.000614008	2.7132	2.7132	CE up vs KE	21.4506	6.75687	0.839992	1
216248	8133880	NM_001001548 // CD36 /// NM_001001547 // CD36 /// NM_000072 // CD36 /// NM_00112	CD36	NM_001001548	6.86589e-05	0.526332	0.882113	-1.13364	CE down vs CB	5.39004e-05	4.35412	4.35412	CE up vs KE	33.7492	11.3349	0.895623	1
216351	8133994	NM_021723 // ADAM22 /// NM_021722 // ADAM22 /// NM_016351 // ADAM22 /// NM_00419	ADAM22	NM_021723	0.00160406	0.533627	1.11974	1.11974	CE up vs CB	0.000381242	2.76699	2.76699	CE up vs KE	13.734	3.88877	0.755064	1
217184	8134903	NM_005273 // GNB2 /// ENST00000303210 // GNB2 /// ENST00000393926 // GNB2 /// EN	GNB2	NM_005273	0.000634169	0.654164	1.07236	1.07236	CE up vs CB	0.000243263	2.55974	2.55974	CE up vs KE	18.0968	3.82199	0.563192	1
217342	8135075	NM_000602 // SERPINE1 /// ENST00000223095 // SERPINE1 /// BC010860 // SERPINE1	SERPINE1	NM_000602	1.25723e-06	0.553044	1.08446	1.08446	CE up vs CB	1.11555e-06	5.53811	5.53811	CE up vs KE	96.8082	15.5514	0.428377	1
218247	8136077	NM_178562 // TSPAN33 /// ENST00000289407 // TSPAN33 /// BC044244 // TSPAN33	TSPAN33	NM_178562	0.000532072	0.0862796	1.3207	1.3207	CE up vs CB	0.00109713	2.0271	2.0271	CE up vs KE	19.0418	3.60931	0.505458	1
219046	8136990	NM_005435 // ARHGEF5 /// ENST00000056217 // ARHGEF5 /// ENST00000344879 // ARHGE	ARHGEF5	NM_005435	0.00227416	0.00336166	2.26858	2.26858	CE up vs CB	0.00113623	2.67228	2.67228	CE up vs KE	12.337	4.57621	0.989158	1
219341	8137328	NM_007188 // ABCB8 /// ENST00000358849 // ABCB8 /// BC141814 // ABCB8 /// ENST00	ABCB8	NM_007188	0.00346036	0.21427	0.76072	-1.31454	CE down vs CB	0.00392756	2.25185	2.25185	CE up vs KE	10.8102	4.16145	1.02655	1
220014	8138077	NM_004227 // CYTH3 /// ENST00000350796 // CYTH3 /// BC028717 // CYTH3 /// ENST00	CYTH3	NM_004227	0.00100953	0.704412	1.05563	1.05563	CE up vs CB	0.000884467	2.02936	2.02936	CE up vs KE	15.785	2.80219	0.473394	1
220178	8138260	NM_001135924 // VWDE /// ENST00000452576 // VWDE /// ENST00000275358 // VWDE ///	VWDE	NM_001135924	5.84011e-05	0.0281423	0.68925	-1.45085	CE down vs CB	0.000320184	2.30705	2.30705	CE up vs KE	35.2643	6.39267	0.48341	1
220389	8138498	NM_018719 // CDCA7L /// NM_001127370 // CDCA7L /// NM_001127371 // CDCA7L /// EN	CDCA7L	NM_018719	0.00216477	0.731555	1.10369	1.10369	CE up vs CB	0.00819538	2.63574	2.63574	CE up vs KE	12.527	9.04665	1.92579	1
221014	8139221	NM_000168 // GLI3 /// ENST00000395925 // GLI3 /// ENST00000395922 // GLI3 /// M5	GLI3	NM_000168	8.06533e-05	0.131009	1.19045	1.19045	CE up vs CB	9.59292e-05	2.10052	2.10052	CE up vs KE	32.3012	3.24863	0.268195	1
221083	8139301	NM_001127218 // POLD2 /// NM_006230 // POLD2 /// ENST00000395803 // POLD2 /// EN	POLD2	NM_001127218	1.43202e-05	0.216674	1.17472	1.17472	CE up vs CB	6.28219e-05	2.49158	2.49158	CE up vs KE	51.3551	6.9333	0.360019	1
221435	8139684	NM_015198 // COBL /// ENST00000265136 // COBL /// BC150263 // COBL /// BC136441	COBL	NM_015198	8.12076e-06	0.134398	0.846894	-1.18078	CE down vs CB	1.88557e-05	2.44962	2.44962	CE up vs KE	59.6282	5.56073	0.248685	1
221959	8140326	NM_005338 // HIP1 /// ENST00000336926 // HIP1 /// ENST00000404944 // HIP1 /// U7	HIP1	NM_005338	5.81014e-06	0.300609	0.878085	-1.13884	CE down vs CB	4.67107e-05	2.5373	2.5373	CE up vs KE	65.0912	8.41457	0.344729	1
222105	8140489	NM_017439 // PION /// ENST00000257626 // PION /// ENST00000334003 // PION /// EN	PION	NM_017439	0.000456919	0.183592	0.774675	-1.29086	CE down vs CB	0.00413006	2.0057	2.0057	CE up vs KE	19.8958	5.73287	0.768387	1
222318	8140717	NM_001142749 // KIAA1324L /// NM_152748 // KIAA1324L /// ENST00000297222 // KIAA	KIAA1324L	NM_001142749	0.00215311	0.450811	1.15917	1.15917	CE up vs CB	0.00212389	2.29369	2.29369	CE up vs KE	12.548	4.08019	0.867115	1
222334	8140734	NM_024315 // C7orf23 /// ENST00000433078 // C7orf23 /// ENST00000257637 // C7orf	C7orf23	NM_024315	3.00788e-05	0.0227892	1.31029	1.31029	CE up vs CB	2.25938e-05	2.32108	2.32108	CE up vs KE	42.1594	3.64839	0.230768	1
222341	8140743	AB007455 // TP53TG1 /// AB007456 // TP53TG1 /// AB007457 // TP53TG1 /// AB007458	TP53TG1	AB007455	0.000601991	0.988206	1.00281	1.00281	CE up vs CB	0.000562822	2.75539	2.75539	CE up vs KE	18.3728	5.80949	0.843201	1
222559	8140982	NM_152703 // SAMD9L /// ENST00000318238 // SAMD9L /// ENST00000411955 // SAMD9L	SAMD9L	NM_152703	0.00262468	0.00239283	2.0572	2.0572	CE up vs CB	0.00114325	2.25965	2.25965	CE up vs KE	11.7976	3.01609	0.681743	1
222719	8141160	NM_133436 // ASNS /// NM_001673 // ASNS /// NM_183356 // ASNS /// ENST0000017550	ASNS	NM_133436	2.66198e-07	0.178865	1.08368	1.08368	CE up vs CB	7.50839e-07	2.11808	2.11808	CE up vs KE	144.107	4.01535	0.0743031	1
223267	8141783	NM_006989 // RASA4 /// NM_001079877 // RASA4 /// ENST00000262940 // RASA4 /// BC	RASA4	NM_006989	0.00174649	0.392569	0.861473	-1.1608	CE down vs CB	0.00129996	2.21987	2.21987	CE up vs KE	13.3823	3.41268	0.68004	1
223646	8142197	NM_002291 // LAMB1 /// ENST00000222399 // LAMB1 /// BC113455 // LAMB1 /// M61916	LAMB1	NM_002291	0.000877722	0.730909	1.05729	1.05729	CE up vs CB	0.000260258	2.63585	2.63585	CE up vs KE	16.4527	3.76929	0.61093	1
224412	8143051	NM_032826 // SLC35B4 /// ENST00000378509 // SLC35B4 /// AB052892 // SLC35B4 ///	SLC35B4	NM_032826	0.000728471	0.85376	1.04363	1.04363	CE up vs CB	0.000461792	3.58008	3.58008	CE up vs KE	17.3792	8.18961	1.25662	1
224480	8143125	NM_012450 // SLC13A4 /// ENST00000354042 // SLC13A4 /// AB208809 // SLC13A4	SLC13A4	NM_012450	0.000541895	0.0951753	0.73093	-1.36812	CE down vs CB	0.000765624	2.39009	2.39009	CE up vs KE	18.9414	4.87043	0.685684	1
224940	8143644	NM_022445 // TPK1 /// NM_001042482 // TPK1 /// ENST00000360057 // TPK1 /// ENST0	TPK1	NM_022445	0.000294309	0.0853034	0.736124	-1.35847	CE down vs CB	0.000920379	2.21967	2.21967	CE up vs KE	22.5531	5.14661	0.608534	1
225186	8143922	NM_001003802 // SMARCD3 /// NM_003078 // SMARCD3 /// NM_001003801 // SMARCD3 ///	SMARCD3	NM_001003802	0.00216657	0.4222	1.18005	1.18005	CE up vs CB	0.00253967	2.33007	2.33007	CE up vs KE	12.5238	4.49354	0.956801	1
225687	8144501	AK304567 // hCG_1990547 /// NR_024362 // hCG_1990547 /// NR_024361 // hCG_199054	hCG_1990547	AK304567	0.000525209	0.0319841	1.41475	1.41475	CE up vs CB	0.000198569	2.37029	2.37029	CE up vs KE	19.1133	3.2061	0.447311	1
226579	8145488	NM_001386 // DPYSL2 /// ENST00000311151 // DPYSL2 /// ENST00000436721 // DPYSL2	DPYSL2	NM_001386	0.00331593	0.774584	0.954185	-1.04801	CE down vs CB	0.00194177	2.0463	2.0463	CE up vs KE	10.9581	2.57202	0.625905	1
227509	8146549	NM_001077619 // UBXN2B /// ENST00000399598 // UBXN2B /// BC113645 // UBXN2B	UBXN2B	NM_001077619	0.00292943	0.717029	0.936812	-1.06745	CE down vs CB	0.00260609	2.11252	2.11252	CE up vs KE	11.397	3.225	0.754583	1
227843	8146928	NM_172037 // RDH10 /// ENST00000240285 // RDH10 /// BC067131 // RDH10	RDH10	NM_172037	2.67778e-06	0.000385374	1.60231	1.60231	CE up vs CB	6.75779e-06	2.29715	2.29715	CE up vs KE	79.6285	4.85359	0.162541	1
227890	8146983	NM_031461 // CRISPLD1 /// ENST00000262207 // CRISPLD1 /// AY358564 // CRISPLD1	CRISPLD1	NM_031461	0.00242574	0.559387	1.11506	1.11506	CE up vs CB	0.00223965	2.20252	2.20252	CE up vs KE	12.0918	3.62152	0.798673	1
228805	8148002	NM_001025357 // C8orf85 /// ENST00000378279 // C8orf85 /// AB181519 // C8orf85	C8orf85	NM_001025357	2.11189e-07	0.00190212	0.693408	-1.44215	CE down vs CB	6.79359e-07	3.07861	3.07861	CE up vs KE	152.868	9.31698	0.162528	1
228956	8148169	NM_145647 // WDR67 /// NM_001145088 // WDR67 /// ENST00000287380 // WDR67 /// EN	WDR67	NM_145647	0.000308499	0.71145	1.04379	1.04379	CE up vs CB	8.71964e-05	2.25175	2.25175	CE up vs KE	22.2544	2.60552	0.31221	1
229000	8148219	NM_144963 // FAM91A1 /// ENST00000334705 // FAM91A1	FAM91A1	NM_144963	0.000333747	0.114946	1.29618	1.29618	CE up vs CB	0.000569934	2.24254	2.24254	CE up vs KE	21.7634	4.38602	0.53742	1
229442	8148721	NM_003801 // GPAA1 /// ENST00000355091 // GPAA1 /// AB002135 // GPAA1 /// ENST00	GPAA1	NM_003801	1.91398e-05	0.454457	0.938296	-1.06576	CE down vs CB	2.44051e-05	2.01836	2.01836	CE up vs KE	47.5563	2.92379	0.163948	1
229521	8148807	NM_016458 // C8orf30A /// ENST00000347708 // C8orf30A /// BC009915 // C8orf30A /	C8orf30A	NM_016458	2.1048e-05	0.0168901	1.35772	1.35772	CE up vs CB	7.51302e-06	2.81152	2.81152	CE up vs KE	46.3705	4.49192	0.258321	1
230074	8149476	NM_013354 // CNOT7 /// ENST00000361272 // CNOT7 /// BC060852 // CNOT7	CNOT7	NM_013354	3.29843e-06	0.772351	0.977239	-1.02329	CE down vs CB	1.21009e-05	2.08236	2.08236	CE up vs KE	75.4355	4.18147	0.147816	1
230392	8149828	NM_003155 // STC1 /// ENST00000290271 // STC1 /// U25997 // STC1	STC1	NM_003155	3.91766e-08	0.994407	1.00036	1.00036	CE up vs CB	2.38817e-07	2.20512	2.20512	CE up vs KE	234.469	5.39602	0.0613702	1
230614	8150073	NM_015254 // KIF13B /// ENST00000357808 // KIF13B /// AF279865 // KIF13B /// ENS	KIF13B	NM_015254	0.000859466	0.469276	1.12933	1.12933	CE up vs CB	0.00200788	2.05478	2.05478	CE up vs KE	16.555	3.97519	0.640319	1
230961	8150469	NM_020476 // ANK1 /// NM_020477 // ANK1 /// NM_000037 // ANK1 /// NM_020475 // A	ANK1	NM_020476	0.00317481	0.387465	1.27179	1.27179	CE up vs CB	0.000657779	4.1229	4.1229	CE up vs KE	11.1106	7.20133	1.7284	1
231293	8150833	NM_006330 // LYPLA1 /// ENST00000316963 // LYPLA1 /// AF291053 // LYPLA1 /// CR4	LYPLA1	NM_006330	4.75365e-09	0.355487	0.967183	-1.03393	CE down vs CB	9.14093e-09	2.27636	2.27636	CE up vs KE	399.307	4.32991	0.0289161	1
231808	8151427	NM_020647 // JPH1 /// ENST00000342232 // JPH1 /// BC140875 // JPH1	JPH1	NM_020647	3.77265e-05	2.9067e-05	2.74896	2.74896	CE up vs CB	0.000172377	2.19599	2.19599	CE up vs KE	39.6756	5.30581	0.356613	1
232248	8151955	NM_024759 // NIPAL2 /// ENST00000341166 // NIPAL2 /// BC132687 // NIPAL2 /// ENS	NIPAL2	NM_024759	1.1676e-06	0.627144	0.959981	-1.04169	CE down vs CB	1.61204e-06	2.73829	2.73829	CE up vs KE	98.6697	6.04351	0.163333	1
233587	8153440	NM_145201 // NAPRT1 /// ENST00000449291 // NAPRT1 /// AB242230 // NAPRT1 /// BC0	NAPRT1	NM_145201	0.0012734	0.551898	0.864679	-1.1565	CE down vs CB	0.00417335	2.52784	2.52784	CE up vs KE	14.7269	7.56215	1.36931	1
234241	8154148	NM_004170 // SLC1A1 /// ENST00000262352 // SLC1A1 /// BC033040 // SLC1A1 /// ENS	SLC1A1	NM_004170	0.00193062	0.00231169	2.6618	2.6618	CE up vs CB	0.00240977	2.64347	2.64347	CE up vs KE	12.9773	6.03963	1.24107	1
234375	8154306	NM_016275 // SELT /// ENST00000397894 // SELT /// AF131856 // SELT /// AY358095	SELT	NM_016275	3.12307e-07	0.648015	1.02387	1.02387	CE up vs CB	4.8417e-07	2.06359	2.06359	CE up vs KE	138.35	3.20609	0.0617966	1
235616	8155737	NM_004816 // FAM189A2 /// NM_001127608 // FAM189A2 /// ENST00000455972 // FAM189	FAM189A2	NM_004816	3.90472e-05	6.19981e-05	2.97854	2.97854	CE up vs CB	0.000862265	2.09482	2.09482	CE up vs KE	39.3105	7.55768	0.512682	1
235973	8156140	NM_006180 // NTRK2 /// NM_001007097 // NTRK2 /// NM_001018064 // NTRK2 /// NM_00	NTRK2	NM_006180	1.49863e-06	8.19869e-05	1.84244	1.84244	CE up vs CB	1.72294e-05	2.13492	2.13492	CE up vs KE	92.523	6.03332	0.17389	1
236623	8156872	NM_017919 // STX17 /// ENST00000259400 // STX17	STX17	NM_017919	4.51629e-05	0.81531	1.02359	1.02359	CE up vs CB	8.30822e-05	2.02596	2.02596	CE up vs KE	37.8009	3.30291	0.233004	1
236808	8157078	NM_001079802 // FKTN /// NM_006731 // FKTN /// ENST00000223528 // FKTN /// ENST0	FKTN	NM_001079802	0.00135901	0.236236	1.1912	1.1912	CE up vs CB	0.000458914	2.17627	2.17627	CE up vs KE	14.4412	2.52496	0.466251	1
237245	8157563	NM_007018 // CEP110 /// ENST00000373855 // CEP110 /// ENST00000238341 // CEP110	CEP110	NM_007018	0.000135476	0.0943006	1.48287	1.48287	CE up vs CB	2.48756e-05	6.0188	6.0188	CE up vs KE	28.0139	11.309	1.07652	1
237754	8158129	NM_004957 // FPGS /// NM_001018078 // FPGS /// ENST00000393706 // FPGS /// ENST0	FPGS	NM_004957	8.56656e-05	0.763695	1.02992	1.02992	CE up vs CB	6.9398e-05	2.03532	2.03532	CE up vs KE	31.7738	2.67321	0.224353	1
237872	8158260	NM_016174 // CERCAM /// ENST00000372838 // CERCAM /// ENST00000317789 // CERCAM	CERCAM	NM_016174	0.000469237	0.96922	0.995702	-1.00432	CE down vs CB	0.00019572	2.01223	2.01223	CE up vs KE	19.7442	2.16504	0.292412	1
239416	8159939	NM_001039395 // C9orf68 /// ENST00000454239 // C9orf68 /// ENST00000381890 // C9	C9orf68	NM_001039395	0.000138334	0.00770571	1.75704	1.75704	CE up vs CB	3.53106e-05	3.72335	3.72335	CE up vs KE	27.8526	6.64186	0.635905	1
239646	8160196	NM_144966 // FREM1 /// ENST00000452036 // FREM1 /// AB160987 // FREM1 /// ENST00	FREM1	NM_144966	0.00319117	0.314126	0.731349	-1.36734	CE down vs CB	0.00359152	3.27101	3.27101	CE up vs KE	11.0925	8.81572	2.11933	1
240384	8161032	BC033666 // C9orf100 /// NM_032818 // C9orf100 /// ENST00000378387 // C9orf100 /	C9orf100	BC033666	6.17022e-05	0.172513	0.847933	-1.17934	CE down vs CB	7.89569e-05	2.24964	2.24964	CE up vs KE	34.7426	3.94574	0.302855	1
241326	8162123	NM_016548 // GOLM1 /// NM_177937 // GOLM1 /// ENST00000388711 // GOLM1 /// ENST0	GOLM1	NM_016548	0.00240443	0.546107	0.897597	-1.11409	CE down vs CB	0.00123866	2.30465	2.30465	CE up vs KE	12.1251	3.33687	0.733875	1
241686	8162532	---		---	4.07045e-08	0.786206	0.985624	-1.01459	CE down vs CB	6.42428e-08	2.64911	2.64911	CE up vs KE	232.209	5.79552	0.0665552	1
241773	8162628	NM_153698 // C9orf21 /// ENST00000375234 // C9orf21 /// BC136503 // C9orf21 ///	C9orf21	NM_153698	0.0015294	0.797897	1.04134	1.04134	CE up vs CB	0.000760204	2.23778	2.23778	CE up vs KE	13.9343	3.05506	0.584659	1
241884	8162753	NM_003389 // CORO2A /// NM_052820 // CORO2A /// ENST00000375077 // CORO2A /// EN	CORO2A	NM_003389	0.00243766	0.0436286	0.59157	-1.69042	CE down vs CB	0.00839747	2.14244	2.14244	CE up vs KE	12.0733	5.44077	1.20172	1
242619	8163562	NM_138424 // KIF12 /// ENST00000374118 // KIF12 /// BC010626 // KIF12 /// ENST00	KIF12	NM_138424	0.000706749	0.00727266	3.03351	3.03351	CE up vs CB	0.0103696	2.81466	2.81466	CE up vs KE	17.5338	15.8506	2.41068	1
242752	8163705	NM_014010 // ASTN2 /// NM_198186 // ASTN2 /// NM_198187 // ASTN2 /// ENST0000031	ASTN2	NM_014010	0.00235716	0.416165	0.725268	-1.3788	CE down vs CB	0.0404606	2.49609	2.49609	CE up vs KE	12.2003	16.0379	3.50547	1
242850	8163814	NM_015651 // PHF19 /// ENST00000373896 // PHF19 /// BX640713 // PHF19 /// ENST00	PHF19	NM_015651	0.000813137	0.672722	1.07971	1.07971	CE up vs CB	0.00056617	2.62284	2.62284	CE up vs KE	16.8274	4.82459	0.764561	1
243282	8164298	NM_000476 // AK1 /// ENST00000373176 // AK1 /// ENST00000373156 // AK1 /// BT019	AK1	NM_000476	0.00244395	0.488625	0.886218	-1.12839	CE down vs CB	0.00179005	2.14478	2.14478	CE up vs KE	12.0636	3.12923	0.691716	1
243302	8164320	NM_175039 // ST6GALNAC4 /// NM_175040 // ST6GALNAC4 /// ENST00000335791 // ST6GA	ST6GALNAC4	NM_175039	0.000116422	0.272357	1.14335	1.14335	CE up vs CB	6.45423e-05	2.36528	2.36528	CE up vs KE	29.2099	3.53365	0.322598	1
243478	8164512	NM_004059 // CCBL1 /// NM_001122671 // CCBL1 /// NM_001122672 // CCBL1 /// ENST0	CCBL1	NM_004059	0.00137274	0.0649082	0.561374	-1.78134	CE down vs CB	0.00313433	3.08014	3.08014	CE up vs KE	14.3975	9.82781	1.82028	1
243623	8164675	NM_005312 // RAPGEF1 /// NM_198679 // RAPGEF1 /// ENST00000372195 // RAPGEF1 ///	RAPGEF1	NM_005312	0.00280847	0.452977	1.23509	1.23509	CE up vs CB	0.00180459	3.40651	3.40651	CE up vs KE	11.5495	7.75106	1.78965	1
243765	8164828	NM_006266 // RALGDS /// NM_001042368 // RALGDS /// ENST00000372050 // RALGDS ///	RALGDS	NM_006266	0.000110949	0.111976	1.41243	1.41243	CE up vs CB	2.69216e-05	5.22711	5.22711	CE up vs KE	29.5995	10.3674	0.934015	1
244428	8165553	NM_001130969 // NELF /// NM_015537 // NELF /// NM_001130970 // NELF /// NM_00113	NELF	NM_001130969	0.000103749	0.352167	1.15763	1.15763	CE up vs CB	0.000362411	2.39655	2.39655	CE up vs KE	30.1501	6.2007	0.548429	1
244700	8165878	NM_000351 // STS /// ENST00000217961 // STS /// M16505 // STS	STS	NM_000351	8.4329e-05	0.402754	0.879167	-1.13744	CE down vs CB	4.58743e-05	3.18413	3.18413	CE up vs KE	31.9105	6.35064	0.530704	1
245038	8166263	NM_004726 // REPS2 /// NM_001080975 // REPS2 /// ENST00000357277 // REPS2 /// EN	REPS2	NM_004726	5.16999e-05	0.253079	1.13665	1.13665	CE up vs CB	1.2842e-05	2.67434	2.67434	CE up vs KE	36.4467	3.69235	0.270155	1
245187	8166426	NM_000444 // PHEX /// ENST00000379374 // PHEX /// U82970 // PHEX	PHEX	NM_000444	0.00295502	0.127343	1.43145	1.43145	CE up vs CB	0.00393827	2.32537	2.32537	CE up vs KE	11.3658	4.73311	1.11049	1
245797	8167122	NM_006201 // PCTK1 /// NM_033018 // PCTK1 /// ENST00000276052 // PCTK1 /// ENST0	PCTK1	NM_006201	7.48508e-05	0.52094	1.06869	1.06869	CE up vs CB	3.9234e-05	2.23348	2.23348	CE up vs KE	32.9654	3.02396	0.244617	1
247142	8168721	NM_006729 // DIAPH2 /// ENST00000324765 // DIAPH2 /// Y15909 // DIAPH2 /// ENST0	DIAPH2	NM_006729	4.31103e-05	0.681866	0.914652	-1.09331	CE down vs CB	2.62619e-05	6.05147	6.05147	CE up vs KE	38.2775	15.7785	1.09924	1
247594	8169245	NM_002764 // PRPS1 /// ENST00000372435 // PRPS1 /// D00860 // PRPS1 /// ENST0000	PRPS1	NM_002764	8.03559e-06	0.0179918	1.2195	1.2195	CE up vs CB	3.65409e-06	2.11386	2.11386	CE up vs KE	59.7934	2.50751	0.11183	1
247667	8169324	NM_000495 // COL4A5 /// NM_033380 // COL4A5 /// NM_033381 // COL4A5 /// ENST0000	COL4A5	NM_000495	2.88623e-06	0.0816224	1.14414	1.14414	CE up vs CB	1.99998e-06	2.26804	2.26804	CE up vs KE	78.0954	3.34494	0.114217	1
248478	8170253	NM_145662 // SPANXA2 /// NM_013453 // SPANXA1 /// BC069816 // SPANXA1 /// BC0698	SPANXA2	NM_145662	0.000787787	0.438341	0.844843	-1.18365	CE down vs CB	0.00276117	2.41251	2.41251	CE up vs KE	16.9848	6.79852	1.06739	1
248587	8170385	NM_002025 // AFF2 /// ENST00000370460 // AFF2 /// L76569 // AFF2 /// U48436 // A	AFF2	NM_002025	0.00220323	0.069639	1.48625	1.48625	CE up vs CB	0.000464804	2.93049	2.93049	CE up vs KE	12.4589	4.18066	0.894819	1
249356	8171255	NM_000216 // KAL1 /// ENST00000262648 // KAL1 /// M97252 // KAL1	KAL1	NM_000216	0.00234778	0.571757	0.877216	-1.13997	CE down vs CB	0.00163641	2.8126	2.8126	CE up vs KE	12.2154	5.64902	1.2332	1
249522	8171444	NM_003662 // PIR /// NM_001018109 // PIR /// ENST00000380421 // PIR /// ENST0000	PIR	NM_003662	8.35574e-05	0.0548547	0.772737	-1.2941	CE down vs CB	0.000112454	2.23331	2.23331	CE up vs KE	31.9908	3.94588	0.328919	1
250217	8172217	NM_000898 // MAOB /// ENST00000378069 // MAOB /// BC022494 // MAOB	MAOB	NM_000898	1.87948e-08	0.865047	1.012	1.012	CE up vs CB	2.57821e-08	4.22648	4.22648	CE up vs KE	282.321	12.2259	0.11548	1
250873	8172949	NM_031407 // HUWE1 /// ENST00000342160 // HUWE1 /// ENST00000262854 // HUWE1 ///	HUWE1	NM_031407	0.000345553	0.903037	1.01347	1.01347	CE up vs CB	0.000162501	2.02669	2.02669	CE up vs KE	21.5494	2.28444	0.282692	1
251250	8173376	NM_016484 // PDZD11 /// ENST00000239666 // PDZD11 /// ENST00000374454 // PDZD11	PDZD11	NM_016484	4.43348e-07	0.0348128	0.842334	-1.18718	CE down vs CB	9.79867e-07	2.45609	2.45609	CE up vs KE	126.501	5.41454	0.11414	1
251567	8173733	NM_015975 // TAF9B /// ENST00000341864 // TAF9B /// BC146960 // TAF9B	TAF9B	NM_015975	0.00158691	0.49544	1.10226	1.10226	CE up vs CB	0.000555618	2.12448	2.12448	CE up vs KE	13.779	2.39859	0.464204	1
252084	8174323	NM_024657 // MORC4 /// NM_001085354 // MORC4 /// ENST00000355610 // MORC4 /// EN	MORC4	NM_024657	0.0021967	0.0121325	1.56209	1.56209	CE up vs CB	0.000968367	2.01502	2.01502	CE up vs KE	12.4703	2.23294	0.477494	1
252225	8174477	NM_004458 // ACSL4 /// NM_022977 // ACSL4 /// ENST00000340800 // ACSL4 /// ENST0	ACSL4	NM_004458	0.000817431	0.591286	0.897154	-1.11464	CE down vs CB	0.00156967	2.48265	2.48265	CE up vs KE	16.8014	5.92577	0.940522	1
252285	8174544	NM_000555 // DCX /// NM_178152 // DCX /// NM_178153 // DCX /// NM_178151 // DCX	DCX	NM_000555	0.000829438	0.0308284	1.39738	1.39738	CE up vs CB	0.000353353	2.13235	2.13235	CE up vs KE	16.7294	2.56285	0.408519	1
252837	8175178	NM_018388 // MBNL3 /// NM_133486 // MBNL3 /// ENST00000370853 // MBNL3 /// ENST0	MBNL3	NM_018388	0.00276101	0.258203	1.26396	1.26396	CE up vs CB	0.000602085	2.85939	2.85939	CE up vs KE	11.6116	4.02785	0.925019	1
252877	8175224	NM_001448 // GPC4 /// ENST00000370828 // GPC4 /// AF030186 // GPC4	GPC4	NM_001448	0.000369323	0.725538	1.06259	1.06259	CE up vs CB	0.000128874	3.14611	3.14611	CE up vs KE	21.1451	5.51889	0.696003	1
252912	8175271	NM_145284 // FAM122B /// ENST00000298090 // FAM122B /// ENST00000394270 // FAM12	FAM122B	NM_145284	5.52972e-06	0.905093	0.990164	-1.00993	CE down vs CB	1.98683e-05	2.04646	2.04646	CE up vs KE	65.9378	3.98481	0.161154	1
253141	8175536	NM_004065 // CDR1 /// ENST00000370532 // CDR1	CDR1	NM_004065	0.000429564	0.649601	0.897731	-1.11392	CE down vs CB	0.000199663	4.36284	4.36284	CE up vs KE	20.2513	9.91375	1.30543	1
253758	8176232	NM_171998 // RAB39B /// ENST00000369454 // RAB39B /// BC009714 // RAB39B	RAB39B	NM_171998	1.56548e-05	0.389006	0.901118	-1.10973	CE down vs CB	2.48574e-05	2.68692	2.68692	CE up vs KE	50.1588	6.13901	0.326377	1
255626	8178423	NM_005803 // FLOT1 /// ENST00000376389 // FLOT1 /// ENST00000383382 // FLOT1 ///	FLOT1	NM_005803	6.10931e-11	0.0427573	0.937067	-1.06716	CE down vs CB	9.74734e-11	3.1798	3.1798	CE up vs KE	1191.73	8.14495	0.0182255	1
