# Supplementary material for: Histone Demethylase JMJD2B Functions as a Co-Factor of Estrogen Receptor in Breast Cancer Proliferation and Mammary Gland Development
Source: PLoS One. 2011 Mar 18;6(3):e17830. doi: 10.1371/journal.pone.0017830 (PMC3060874; doi:10.1371/journal.pone.0017830)
Supplement: Table S5 — Genes upregulated in E2 treated JMJD2B depleted cells. (XLS) [file pone.0017830.s012.xls]

## Sheet: E2up_2_005
Suppl Table S5
Column #	Column ID	gene_assignment	Gene Symbol	RefSeq	p-value(group)	p-value(CE vs. CB)	Ratio(CE vs. CB)	Fold-Change(CE vs. CB)	Fold-Change(CE vs. CB) (Description)	p-value(CE vs. KE)	Ratio(CE vs. KE)	Fold-Change(CE vs. KE)	Fold-Change(CE vs. KE) (Description)	F(group)	SS(group)	SS(Error)	F(Error)
4760	7897355	NM_015215 // CAMTA1 /// ENST00000303635 // CAMTA1 /// BC151835 // CAMTA1 /// ENS	CAMTA1	NM_015215	0.00214221	0.00711364	2.57863	2.57863	CE up vs CB	0.0677014	0.572573	-1.7465	CE down vs KE	12.5677	8.20822	1.74166	1
5426	7898088	NM_015209 // RP1-21O18.1 /// NM_201628 // RP1-21O18.1 /// ENST00000376030 // RP1	RP1-21O18.1	NM_015209	0.00317484	0.00163688	2.23957	2.23957	CE up vs CB	0.00329939	2.04525	2.04525	CE up vs KE	11.1106	3.1238	0.749748	1
5749	7898447	NM_016233 // PADI3 /// ENST00000375460 // PADI3 /// AB026831 // PADI3	PADI3	NM_016233	2.52611e-06	6.5464e-06	2.79334	2.79334	CE up vs CB	0.0138705	1.36511	1.36511	CE up vs KE	80.8408	7.4539	0.245879	1
7300	7900188	NM_001031740 // MANEAL /// NM_001113482 // MANEAL /// ENST00000373045 // MANEAL	MANEAL	NM_001031740	0.000932655	0.00101842	2.22508	2.22508	CE up vs CB	0.0282002	1.53022	1.53022	CE up vs KE	16.1601	3.83183	0.632311	1
7377	7900275	NM_033044 // MACF1 /// ENST00000289893 // MACF1 /// uc001cdd.1 // MACF1	MACF1	NM_033044	0.00294899	0.00764387	2.90785	2.90785	CE up vs CB	0.297646	0.714557	-1.39947	CE down vs KE	11.3731	9.69681	2.27362	1
7597	7900518	NM_001905 // CTPS /// ENST00000372621 // CTPS /// ENST00000372616 // CTPS /// BC	CTPS	NM_001905	1.42544e-06	1.66565e-06	2.04118	2.04118	CE up vs CB	0.000754075	1.35424	1.35424	CE up vs KE	93.7254	2.90508	0.082655	1
8121	7901090	NM_032756 // HPDL /// ENST00000334815 // HPDL	HPDL	NM_032756	0.000400912	0.000243307	2.43484	2.43484	CE up vs CB	0.00374037	1.77582	1.77582	CE up vs KE	20.6555	3.91059	0.504866	1
10489	7903720	NM_139156 // AMPD2 /// ENST00000342115 // AMPD2 /// BC007711 // AMPD2	AMPD2	NM_139156	0.000592999	0.00154608	2.45368	2.45368	CE up vs CB	0.00991211	1.90075	1.90075	CE up vs KE	18.4533	6.30987	0.911834	1
11079	7904373	NM_006784 // WDR3 /// ENST00000349139 // WDR3 /// AF083217 // WDR3	WDR3	NM_006784	0.0033634	0.00683198	2.04778	2.04778	CE up vs CB	0.147998	0.727984	-1.37366	CE down vs KE	10.9086	4.01659	0.981876	1
11372	7904850	NM_002614 // PDZK1 /// NR_003377 // PDZK1P1 /// ENST00000417171 // PDZK1 /// ENS	PDZK1	NM_002614	4.14715e-07	4.63432e-07	8.89408	8.89408	CE up vs CB	0.00436045	1.79729	1.79729	CE up vs KE	128.679	26.8308	0.556024	1
11374	7904852	NR_003377 // PDZK1P1 /// NM_002614 // PDZK1 /// ENST00000417171 // PDZK1 /// ENS	PDZK1P1	NR_003377	7.89641e-05	0.000134409	2.3066	2.3066	CE up vs CB	0.000819141	1.8912	1.8912	CE up vs KE	32.4882	4.56359	0.374584	1
13107	7906843	NM_014697 // NOS1AP /// ENST00000361897 // NOS1AP /// BC112295 // NOS1AP /// BC1	NOS1AP	NM_014697	2.21451e-05	2.9008e-05	2.99266	2.99266	CE up vs CB	0.053749	0.746314	-1.33992	CE down vs KE	45.748	7.18478	0.418803	1
13797	7907609	NM_021165 // FAM5B /// ENST00000361539 // FAM5B /// AB161694 // FAM5B	FAM5B	NM_021165	1.32286e-05	1.3091e-05	2.68169	2.68169	CE up vs CB	0.0030983	1.54745	1.54745	CE up vs KE	52.4422	5.37028	0.273077	1
14285	7908140	NM_015149 // RGL1 /// ENST00000304685 // RGL1 /// ENST00000367531 // RGL1 /// AF	RGL1	NM_015149	0.00216993	0.00284888	3.1405	3.1405	CE up vs CB	0.00863377	2.54238	2.54238	CE up vs KE	12.5178	8.5527	1.82199	1
14987	7908913	NM_000674 // ADORA1 /// NM_001048230 // ADORA1 /// ENST00000309502 // ADORA1 ///	ADORA1	NM_000674	0.000724488	0.00106253	2.68928	2.68928	CE up vs CB	0.190292	0.753099	-1.32785	CE down vs KE	17.4071	6.40113	0.980617	1
15308	7909264	NM_018724 // IL20 /// ENST00000367098 // IL20 /// ENST00000367096 // IL20 /// AY	IL20	NM_018724	6.36926e-08	1.04688e-07	18.9514	18.9514	CE up vs CB	2.8943e-05	4.07505	4.07505	CE up vs KE	207.308	53.4466	0.6875	1
15515	7909488	NM_014388 // C1orf107 /// ENST00000367020 // C1orf107 /// AK289613 // C1orf107 /	C1orf107	NM_014388	0.000134153	0.000120977	2.22221	2.22221	CE up vs CB	0.173725	0.841905	-1.18778	CE down vs KE	28.0899	3.49427	0.331722	1
15600	7909582	NM_016448 // DTL /// ENST00000366991 // DTL /// AK292343 // DTL /// ENST00000420	DTL	NM_016448	7.26305e-06	8.33532e-06	2.12315	2.12315	CE up vs CB	0.0325481	1.21395	1.21395	CE up vs KE	61.3989	3.24403	0.140894	1
15719	7909713	NM_016343 // CENPF /// ENST00000366955 // CENPF /// U19769 // CENPF	CENPF	NM_016343	0.00150055	0.00146419	4.27765	4.27765	CE up vs CB	0.183189	0.639673	-1.5633	CE down vs KE	14.0151	12.3423	2.34838	1
18959	7913361	NM_001397 // ECE1 /// NM_001113349 // ECE1 /// NM_001113347 // ECE1 /// NM_00111	ECE1	NM_001397	9.42997e-07	2.03681e-06	2.14155	2.14155	CE up vs CB	0.000482992	1.42757	1.42757	CE up vs KE	104.244	3.87962	0.0992444	1
19231	7913647	NM_004091 // E2F2 /// ENST00000361729 // E2F2 /// BC053676 // E2F2	E2F2	NM_004091	0.00265738	0.00184273	2.71839	2.71839	CE up vs CB	0.139825	1.43223	1.43223	CE up vs KE	11.7519	5.287	1.1997	1
19833	7914328	NM_024522 // NKAIN1 /// ENST00000263693 // NKAIN1 /// AK299507 // NKAIN1 /// ENS	NKAIN1	NM_024522	2.34124e-06	4.35752e-05	2.52469	2.52469	CE up vs CB	3.17303e-05	2.63178	2.63178	CE up vs KE	82.4479	10.3428	0.334524	1
20435	7914983	NM_000831 // GRIK3 /// ENST00000373091 // GRIK3 /// U16127 // GRIK3 /// ENST0000	GRIK3	NM_000831	9.51721e-06	8.4331e-05	2.78808	2.78808	CE up vs CB	0.0174653	0.657316	-1.52134	CE down vs KE	57.1946	10.5844	0.493491	1
20872	7915478	NM_006516 // SLC2A1 /// ENST00000426263 // SLC2A1 /// AK292791 // SLC2A1 /// ENS	SLC2A1	NM_006516	4.12831e-06	9.3928e-06	2.10059	2.10059	CE up vs CB	0.00434027	1.34431	1.34431	CE up vs KE	71.1592	3.77265	0.141379	1
21343	7915999	NM_007051 // FAF1 /// ENST00000396153 // FAF1 /// BC004970 // FAF1 /// ENST00000	FAF1	NM_007051	0.000775216	0.00019106	2.74839	2.74839	CE up vs CB	0.00612976	1.7776	1.7776	CE up vs KE	17.0652	3.88455	0.607013	1
21504	7916173	NM_004153 // ORC1L /// ENST00000371568 // ORC1L /// ENST00000371566 // ORC1L ///	ORC1L	NM_004153	0.00220148	0.00156614	2.49757	2.49757	CE up vs CB	0.407393	0.843049	-1.18617	CE down vs KE	12.4619	4.4501	0.952254	1
25637	7920915	NM_020131 // UBQLN4 /// ENST00000368309 // UBQLN4 /// AF188240 // UBQLN4 /// BC0	UBQLN4	NM_020131	0.0017498	0.000282745	2.08804	2.08804	CE up vs CB	0.128146	1.22641	1.22641	CE up vs KE	13.3745	1.81203	0.361289	1
26719	7922103	NR_026550 // BRP44	BRP44	NR_026550	0.000919975	0.0103501	2.05752	2.05752	CE up vs CB	0.00666536	0.455475	-2.19551	CE down vs KE	16.2257	7.12472	1.17094	1
28490	7924082	NM_172362 // KCNH1 /// NM_002238 // KCNH1 /// ENST00000367007 // KCNH1 /// ENST0	KCNH1	NM_172362	3.96716e-07	8.30109e-07	6.05417	6.05417	CE up vs CB	0.00211728	1.80585	1.80585	CE up vs KE	130.148	21.428	0.439051	1
29295	7924978	NM_024554 // PGBD5 /// ENST00000391860 // PGBD5 /// ENST00000321327 // PGBD5 ///	PGBD5	NM_024554	1.9726e-05	6.00031e-05	2.0513	2.0513	CE up vs CB	0.0714696	0.822856	-1.21528	CE down vs KE	47.1768	3.8945	0.220136	1
29651	7925368	NM_018072 // HEATR1 /// ENST00000366582 // HEATR1 /// BC150614 // HEATR1 /// ENS	HEATR1	NM_018072	0.00260039	0.000511716	2.34098	2.34098	CE up vs CB	0.310525	1.17881	1.17881	CE up vs KE	11.832	2.55886	0.57671	1
30327	7926143	NM_001025076 // CUGBP2 /// NM_006561 // CUGBP2 /// NM_001025077 // CUGBP2 /// NM	CUGBP2	NM_001025076	0.00157452	0.000979987	3.39759	3.39759	CE up vs CB	0.0605993	1.6953	1.6953	CE up vs KE	13.8119	7.56534	1.46065	1
30443	7926270	NM_182751 // MCM10 /// NM_018518 // MCM10 /// ENST00000361282 // MCM10 /// ENST0	MCM10	NM_182751	2.10179e-06	1.11402e-06	2.30356	2.30356	CE up vs CB	0.0697479	1.14291	1.14291	CE up vs KE	84.7824	3.23583	0.101777	1
30904	7926777	NM_000818 // GAD2 /// NM_001134366 // GAD2 /// ENST00000259271 // GAD2 /// ENST0	GAD2	NM_000818	0.000540873	0.000217659	2.9613	2.9613	CE up vs CB	0.00378529	1.98917	1.98917	CE up vs KE	18.9517	5.16782	0.727156	1
31012	7926904	NM_005204 // MAP3K8 /// ENST00000263056 // MAP3K8 /// ENST00000375328 // MAP3K8	MAP3K8	NM_005204	0.000894935	0.000252381	2.6609	2.6609	CE up vs CB	0.479102	1.12379	1.12379	CE up vs KE	16.3586	3.78664	0.617271	1
31220	7927137	NM_020975 // RET /// NM_020630 // RET /// ENST00000340058 // RET /// ENST0000035	RET	NM_020975	3.88404e-08	7.32857e-08	2.86715	2.86715	CE up vs CB	0.000362939	1.39753	1.39753	CE up vs KE	234.981	7.08989	0.0804592	1
31945	7927954	BX648405 // DDX21	DDX21	BX648405	0.000743218	0.00142567	2.02907	2.02907	CE up vs CB	0.124658	0.774974	-1.29037	CE down vs KE	17.2775	3.57488	0.55176	1
32053	7928076	NM_005203 // COL13A1 /// NM_080806 // COL13A1 /// NM_080807 // COL13A1 /// NM_08	COL13A1	NM_005203	0.00343083	0.00532687	2.88529	2.88529	CE up vs CB	0.00292133	3.25463	3.25463	CE up vs KE	10.8398	7.94446	1.95439	1
33690	7929907	NM_021830 // C10orf2 /// ENST00000311916 // C10orf2 /// AF292005 // C10orf2 ///	C10orf2	NM_021830	0.000141493	0.000123438	2.05474	2.05474	CE up vs CB	0.385738	0.908799	-1.10035	CE down vs KE	27.6792	2.81685	0.27138	1
33772	7930002	NM_015062 // PPRC1 /// ENST00000278070 // PPRC1 /// AF325193 // PPRC1 /// ENST00	PPRC1	NM_015062	0.00185464	0.000371807	2.7761	2.7761	CE up vs CB	0.335211	1.19503	1.19503	CE up vs KE	13.1383	3.71598	0.754228	1
33787	7930018	NM_004741 // NOLC1 /// ENST00000370007 // NOLC1 /// BC001883 // NOLC1 /// ENST00	NOLC1	NM_004741	0.000818369	0.000319605	2.36191	2.36191	CE up vs CB	0.204357	1.21848	1.21848	CE up vs KE	16.7957	3.21654	0.510693	1
33921	7930161	NM_178858 // SFXN2 /// ENST00000369893 // SFXN2 /// BC022091 // SFXN2	SFXN2	NM_178858	1.79561e-08	3.20843e-07	2.43816	2.43816	CE up vs CB	1.28898e-05	1.73083	1.73083	CE up vs KE	285.596	9.0077	0.0841068	1
33991	7930241	NM_014976 // PDCD11 /// ENST00000369797 // PDCD11 /// D80007 // PDCD11	PDCD11	NM_014976	0.00314283	0.000746648	2.1279	2.1279	CE up vs CB	0.0412003	1.41563	1.41563	CE up vs KE	11.1463	2.13579	0.510969	1
34212	7930485	NM_000681 // ADRA2A /// AF284095 // ADRA2A /// ENST00000449894 // ADRA2A /// ENS	ADRA2A	NM_000681	1.64571e-06	2.41831e-06	2.14848	2.14848	CE up vs CB	0.0421487	0.855225	-1.16928	CE down vs KE	90.3146	3.54607	0.104703	1
35466	7931864	NR_024581 // ASB13 /// NM_024701 // ASB13 /// ENST00000357700 // ASB13 /// BC012	ASB13	NR_024581	2.47045e-08	2.56244e-07	3.21538	3.21538	CE up vs CB	3.05195e-05	1.86084	1.86084	CE up vs KE	263.475	13.4687	0.136318	1
35970	7932414	NM_001004470 // ST8SIA6 /// ENST00000377602 // ST8SIA6 /// BC137102 // ST8SIA6 /	ST8SIA6	NM_001004470	7.12073e-05	0.00017178	3.14853	3.14853	CE up vs CB	0.0437386	0.659366	-1.51661	CE down vs KE	33.4163	9.49035	0.757343	1
36316	7932806	NM_003174 // SVIL /// NM_021738 // SVIL /// ENST00000375398 // SVIL /// ENST0000	SVIL	NM_003174	5.18817e-09	1.74544e-08	2.12948	2.12948	CE up vs CB	0.0836032	0.93515	-1.06935	CE down vs KE	390.607	4.21337	0.0287646	1
36656	7933200	NM_199168 // CXCL12 /// NM_000609 // CXCL12 /// NM_001033886 // CXCL12 /// ENST0	CXCL12	NM_199168	5.90784e-10	6.52957e-10	3.34215	3.34215	CE up vs CB	7.16851e-05	0.765623	-1.30613	CE down vs KE	674.531	8.08831	0.031976	1
37215	7933824	NM_014836 // RHOBTB1 /// NR_024554 // RHOBTB1 /// NR_024555 // RHOBTB1 /// NR_02	RHOBTB1	NM_014836	2.05533e-06	1.55176e-06	6.67922	6.67922	CE up vs CB	0.0230209	1.53034	1.53034	CE up vs KE	85.274	18.378	0.574711	1
38401	7935150	NM_022451 // NOC3L /// ENST00000371361 // NOC3L /// BC049850 // NOC3L /// ENST00	NOC3L	NM_022451	0.00339448	0.00206461	2.04334	2.04334	CE up vs CB	0.777249	0.954364	-1.04782	CE down vs KE	10.8767	2.59558	0.636365	1
38692	7935458	NM_015179 // RRP12 /// NM_001145114 // RRP12 /// ENST00000414986 // RRP12 /// EN	RRP12	NM_015179	5.35091e-07	7.2854e-07	2.04389	2.04389	CE up vs CB	0.00224949	0.79586	-1.2565	CE down vs KE	120.555	3.0238	0.066886	1
39614	7936458	NM_001001936 // AFAP1L2 /// NM_032550 // AFAP1L2 /// ENST00000304129 // AFAP1L2	AFAP1L2	NM_001001936	0.00184893	0.00217771	2.22871	2.22871	CE up vs CB	0.00110974	2.44879	2.44879	CE up vs KE	13.1507	4.0191	0.814981	1
39973	7936851	NM_198148 // CPXM2 /// ENST00000241305 // CPXM2 /// AY358565 // CPXM2 /// ENST00	CPXM2	NM_198148	0.00112906	0.00254957	2.78964	2.78964	CE up vs CB	0.228456	1.36312	1.36312	CE up vs KE	15.2674	8.06837	1.40925	1
40111	7937008	NM_001039762 // C10orf141 /// AK127465 // C10orf141	C10orf141	NM_001039762	1.22595e-05	3.55481e-05	2.72897	2.72897	CE up vs CB	0.0151723	1.45551	1.45551	CE up vs KE	53.5058	7.45465	0.371531	1
41437	7938516	NM_014632 // MICAL2 /// ENST00000256194 // MICAL2 /// BC044577 // MICAL2 /// BX5	MICAL2	NM_014632	0.000667941	0.000535054	2.22617	2.22617	CE up vs CB	0.0171308	1.53961	1.53961	CE up vs KE	17.8253	3.45964	0.517562	1
41601	7938705	NR_026750 // DKFZp686O24166 /// BX537685 // DKFZp686O24166 /// ENST00000338965 /	DKFZp686O24166	NR_026750	3.12391e-05	1.8026e-05	2.05716	2.05716	CE up vs CB	0.318572	0.918584	-1.08863	CE down vs KE	41.7345	2.49212	0.159236	1
41751	7938871	NM_182964 // NAV2 /// NM_145117 // NAV2 /// NM_001111018 // NAV2 /// NM_00111101	NAV2	NM_182964	0.00232166	0.0188695	3.05899	3.05899	CE up vs CB	0.761032	0.886998	-1.1274	CE down vs KE	12.258	16.6679	3.62601	1
42201	7939364	NM_000610 // CD44 /// NM_001001389 // CD44 /// NM_001001390 // CD44 /// NM_00100	CD44	NM_000610	0.000670841	0.000267764	2.47607	2.47607	CE up vs CB	0.814384	0.964977	-1.03629	CE down vs KE	17.8028	3.59946	0.539161	1
42859	7940148	NM_198947 // FAM111B /// NM_001142703 // FAM111B /// NM_001142704 // FAM111B ///	FAM111B	NM_198947	0.000125688	0.000208571	2.10586	2.10586	CE up vs CB	0.0471449	0.761391	-1.31339	CE down vs KE	28.6	3.62422	0.337923	1
44653	7942130	NM_053056 // CCND1 /// ENST00000227507 // CCND1 /// BC023620 // CCND1	CCND1	NM_053056	1.3123e-07	1.68234e-07	2.08145	2.08145	CE up vs CB	0.0731667	1.0948	1.0948	CE up vs KE	172.548	3.1189	0.0482016	1
45092	7942620	NM_032564 // DGAT2 /// ENST00000228027 // DGAT2 /// BC015234 // DGAT2 /// ENST00	DGAT2	NM_032564	0.00154856	0.000250635	2.1701	2.1701	CE up vs CB	0.0524798	1.3269	1.3269	CE up vs KE	13.8818	2.00974	0.386068	1
45144	7942677	NM_015516 // TSKU /// ENST00000333090 // TSKU /// AY358317 // TSKU /// ENST00000	TSKU	NM_015516	8.96577e-08	2.49206e-07	3.23315	3.23315	CE up vs CB	0.111302	0.876024	-1.14152	CE down vs KE	190.083	9.73879	0.136625	1
45257	7942805	NM_020798 // USP35 /// ENST00000263311 // USP35 /// BC131489 // USP35 /// ENST00	USP35	NM_020798	0.0018309	0.00124939	4.19337	4.19337	CE up vs CB	0.249931	1.44138	1.44138	CE up vs KE	13.1903	10.7306	2.16938	1
45280	7942838	NM_145018 // C11orf82 /// ENST00000329143 // C11orf82 /// AK292399 // C11orf82 /	C11orf82	NM_145018	2.71775e-06	2.14328e-06	2.21201	2.21201	CE up vs CB	0.000182993	1.53994	1.53994	CE up vs KE	79.3232	3.25163	0.109312	1
45391	7942962	NM_007173 // PRSS23 /// ENST00000280258 // PRSS23 /// BC001278 // PRSS23 /// ENS	PRSS23	NM_007173	0.000108603	6.63121e-05	2.25528	2.25528	CE up vs CB	0.435608	1.09247	1.09247	CE up vs KE	29.7739	3.23894	0.290092	1
46042	7943694	NM_004398 // DDX10 /// ENST00000322536 // DDX10 /// AB040537 // DDX10	DDX10	NM_004398	2.50166e-05	7.96603e-06	2.33694	2.33694	CE up vs CB	0.0946894	1.17292	1.17292	CE up vs KE	44.2861	2.93833	0.17693	1
46472	7944178	NM_019894 // TMPRSS4 /// NM_001083947 // TMPRSS4 /// ENST00000339018 // TMPRSS4	TMPRSS4	NM_019894	0.00311608	0.0467505	2.0082	2.0082	CE up vs CB	0.00237046	3.66206	3.66206	CE up vs KE	11.1766	9.22251	2.20044	1
46939	7944691	NM_003105 // SORL1 /// ENST00000260197 // SORL1 /// BC137171 // SORL1	SORL1	NM_003105	0.00244137	0.0059626	2.60955	2.60955	CE up vs CB	0.00751913	2.50369	2.50369	CE up vs KE	12.0676	7.55798	1.67014	1
47800	7945664	ENST00000340134 // CTSD /// ENST00000382123 // CTSD /// AK022293 // CTSD /// BC0	CTSD	ENST00000340134	3.21058e-06	4.30572e-06	2.02141	2.02141	CE up vs CB	0.00189856	1.339	1.339	CE up vs KE	75.9663	2.94145	0.103255	1
47816	7945683	NR_002196 // H19 /// BC063626 // H19	H19	NR_002196	2.12862e-07	0.000243031	2.97849	2.97849	CE up vs CB	2.08326e-06	0.122455	-8.1663	CE down vs KE	152.561	43.4329	0.75918	1
49211	7947276	NM_001584 // MPPED2 /// ENST00000358117 // MPPED2 /// U57911 // MPPED2	MPPED2	NM_001584	2.29271e-07	1.8117e-07	7.26903	7.26903	CE up vs CB	0.00017892	2.19409	2.19409	CE up vs KE	149.7	20.1931	0.359707	1
51543	7949900	ENST00000319373 // LOC645332 /// AK055771 // LOC645332 /// BC063712 // LOC645332	LOC645332	ENST00000319373	0.00157549	0.00144512	2.28881	2.28881	CE up vs CB	0.0701303	1.43929	1.43929	CE up vs KE	13.8093	3.93031	0.75897	1
52242	7950680	NM_080491 // GAB2 /// NM_012296 // GAB2 /// ENST00000340149 // GAB2 /// ENST0000	GAB2	NM_080491	0.00345944	0.000819554	2.66366	2.66366	CE up vs CB	0.00420446	2.106	2.106	CE up vs KE	10.8111	3.59035	0.885595	1
52641	7951132	---		---	0.00222776	0.00107494	2.03214	2.03214	CE up vs CB	0.216204	1.21053	1.21053	CE up vs KE	12.4162	2.35451	0.505687	1
52671	7951170	NM_000926 // PGR /// ENST00000325455 // PGR /// X51730 // PGR /// ENST0000026346	PGR	NM_000926	0.000382707	0.00216619	2.66229	2.66229	CE up vs CB	0.0407504	1.71154	1.71154	CE up vs KE	20.9315	9.53249	1.21444	1
58718	7957938	NM_014503 // UTP20 /// ENST00000261637 // UTP20 /// AF072718 // UTP20	UTP20	NM_014503	6.40617e-05	0.000152454	2.01167	2.01167	CE up vs CB	0.0115376	0.711805	-1.40488	CE down vs KE	34.3906	3.50395	0.271698	1
58817	7958052	NM_004316 // ASCL1 /// ENST00000266744 // ASCL1 /// BC004425 // ASCL1	ASCL1	NM_004316	2.45706e-07	4.10068e-07	2.91268	2.91268	CE up vs CB	0.00681032	1.29677	1.29677	CE up vs KE	147.081	7.11085	0.128924	1
59187	7958456	NM_080911 // UNG /// ENST00000242576 // UNG	UNG	NM_080911	0.000429501	0.00150057	2.39405	2.39405	CE up vs CB	0.419	1.17064	1.17064	CE up vs KE	20.2522	6.48654	0.854102	1
59783	7959104	NM_014365 // HSPB8 /// ENST00000281938 // HSPB8 /// BC002673 // HSPB8	HSPB8	NM_014365	1.30757e-09	1.27554e-09	3.5764	3.5764	CE up vs CB	0.070763	0.91792	-1.08942	CE down vs KE	552.494	8.74645	0.0422156	1
59925	7959264	NM_002562 // P2RX7 /// ENST00000261826 // P2RX7 /// BC121158 // P2RX7 /// ENST00	P2RX7	NM_002562	0.000251147	0.00010569	3.98116	3.98116	CE up vs CB	9.76654e-05	4.04393	4.04393	CE up vs KE	23.585	8.4497	0.955377	1
59962	7959306	NM_001080825 // TMEM120B /// ENST00000449592 // TMEM120B /// ENST00000342607 //	TMEM120B	NM_001080825	2.1489e-06	1.59465e-06	2.55289	2.55289	CE up vs CB	0.206767	1.10873	1.10873	CE up vs KE	84.2976	4.45686	0.140988	1
60595	7959993	NM_025215 // PUS1 /// NM_001002019 // PUS1 /// NM_001002020 // PUS1 /// ENST0000	PUS1	NM_025215	7.53866e-05	4.71627e-05	2.46349	2.46349	CE up vs CB	0.371739	0.897822	-1.11381	CE down vs KE	32.9014	3.99855	0.324083	1
60611	7960010	NM_015409 // EP400 /// ENST00000389562 // EP400 /// AY044869 // EP400 /// ENST00	EP400	NM_015409	0.0014489	0.000550806	2.16134	2.16134	CE up vs CB	0.0578024	1.36095	1.36095	CE up vs KE	14.1645	2.57266	0.484339	1
61136	7960588	NM_006170 // NOP2 /// NM_001033714 // NOP2 /// ENST00000399466 // NOP2 /// BC106	NOP2	NM_006170	0.0011196	0.000404768	2.08669	2.08669	CE up vs CB	0.965856	1.00562	1.00562	CE up vs KE	15.3058	2.3051	0.401608	1
61371	7960852	NM_153449 // SLC2A14 /// ENST00000340749 // SLC2A14 /// ENST00000396589 // SLC2A	SLC2A14	NM_153449	0.00298751	0.00199008	2.90311	2.90311	CE up vs CB	0.273627	1.32062	1.32062	CE up vs KE	11.3266	5.93876	1.39819	1
61971	7961544	NM_032918 // RERG /// ENST00000256953 // RERG /// BC007997 // RERG	RERG	NM_032918	1.02446e-05	5.59255e-05	2.04228	2.04228	CE up vs CB	0.000363319	1.72417	1.72417	CE up vs KE	56.0974	4.48495	0.213198	1
62292	7961895	NM_030762 // BHLHE41 /// ENST00000242728 // BHLHE41 /// BC025968 // BHLHE41	BHLHE41	NM_030762	0.00022951	0.000924477	2.26846	2.26846	CE up vs CB	0.0279168	0.650465	-1.53736	CE down vs KE	24.1896	5.83345	0.64308	1
65930	7965922	NM_001031701 // NT5DC3 /// ENST00000392876 // NT5DC3 /// AB032773 // NT5DC3 ///	NT5DC3	NM_001031701	8.33372e-06	1.58248e-05	2.08857	2.08857	CE up vs CB	0.00760382	0.753028	-1.32797	CE down vs KE	59.2246	3.55859	0.16023	1
67241	7967360	NM_020845 // PITPNM2 /// ENST00000320201 // PITPNM2 /// ENST00000280562 // PITPN	PITPNM2	NM_020845	0.00230234	0.00187314	3.50595	3.50595	CE up vs CB	0.000933339	4.07597	4.07597	CE up vs KE	12.2899	8.74794	1.89813	1
69231	7969586	NR_027350 // MIR17HG /// AB176708 // MIR17HG	MIR17HG	NR_027350	0.00233079	0.000435056	2.36611	2.36611	CE up vs CB	0.00196947	1.9686	1.9686	CE up vs KE	12.2431	2.58357	0.562728	1
69369	7969742	NM_005766 // FARP1 /// ENST00000319562 // FARP1 /// BC071592 // FARP1 /// ENST00	FARP1	NM_005766	0.00268476	0.00220283	2.01068	2.01068	CE up vs CB	0.440009	0.879709	-1.13674	CE down vs KE	11.7142	2.72995	0.621458	1
69756	7970166	NM_015205 // ATP11A /// NM_032189 // ATP11A /// ENST00000375630 // ATP11A /// EN	ATP11A	NM_015205	0.00237403	0.00405472	2.29179	2.29179	CE up vs CB	0.114617	0.691569	-1.44599	CE down vs KE	12.1732	4.94754	1.08381	1
70304	7970785	NM_002019 // FLT1 /// NM_001159920 // FLT1 /// NM_001160030 // FLT1 /// NM_00116	FLT1	NM_002019	0.000851635	0.00211713	3.8786	3.8786	CE up vs CB	0.000522691	5.45476	5.45476	CE up vs KE	16.5998	14.3746	2.30921	1
70328	7970813	NM_003045 // SLC7A1 /// ENST00000380752 // SLC7A1 /// BC063303 // SLC7A1	SLC7A1	NM_003045	0.00287394	0.00108299	2.01589	2.01589	CE up vs CB	0.0523509	1.37803	1.37803	CE up vs KE	11.466	2.13049	0.495491	1
70429	7970927	NM_178006 // STARD13 /// NM_178007 // STARD13 /// NM_052851 // STARD13 /// ENST0	STARD13	NM_178006	2.82084e-06	1.30786e-05	2.14283	2.14283	CE up vs CB	0.75158	0.973881	-1.02682	CE down vs KE	78.561	4.80088	0.162961	1
71739	7972405	BC067807 // UGGT2	UGGT2	BC067807	0.00181852	0.00188683	4.01578	4.01578	CE up vs CB	0.00479237	3.25912	3.25912	CE up vs KE	13.2178	11.5833	2.33692	1
73640	7974569	ENST00000446279 // MUDENG	MUDENG	ENST00000446279	0.0024209	0.000480038	2.56355	2.56355	CE up vs CB	0.324214	1.19118	1.19118	CE up vs KE	12.0993	3.1433	0.692776	1
74751	7975785	NM_005252 // FOS /// ENST00000303562 // FOS /// BX647104 // FOS	FOS	NM_005252	5.36973e-05	6.33325e-05	2.65698	2.65698	CE up vs CB	0.000270263	2.20971	2.20971	CE up vs KE	36.0751	5.593	0.413434	1
74925	7975974	AK292571 // C14orf174 /// ENST00000216471 // C14orf174	C14orf174	AK292571	8.07841e-05	0.000475992	2.20889	2.20889	CE up vs CB	0.756692	1.04592	1.04592	CE up vs KE	32.2869	5.92889	0.489684	1
75387	7976492	NM_000624 // SERPINA5 /// ENST00000329597 // SERPINA5 /// BC008915 // SERPINA5 /	SERPINA5	NM_000624	0.0013995	0.0034207	2.30642	2.30642	CE up vs CB	0.0262002	1.7405	1.7405	CE up vs KE	14.3138	5.56014	1.03585	1
77536	7978914	NM_001012706 // C14orf182 /// ENST00000399206 // C14orf182 /// BC128083 // C14or	C14orf182	NM_001012706	0.0021918	0.00908508	2.88865	2.88865	CE up vs CB	0.352766	1.35795	1.35795	CE up vs KE	12.4789	11.2433	2.40261	1
78271	7979724	BC104940 // C14orf83 /// BC104942 // C14orf83 /// NM_182526 // C14orf83 /// ENST	C14orf83	BC104940	0.000563796	0.00063064	2.78201	2.78201	CE up vs CB	0.0145172	1.79761	1.79761	CE up vs KE	18.7254	6.24969	0.890011	1
78851	7980384	NM_213601 // TMED8 /// ENST00000216468 // TMED8 /// AK095650 // TMED8	TMED8	NM_213601	0.00148141	0.00249624	2.14217	2.14217	CE up vs CB	0.0238457	1.63062	1.63062	CE up vs KE	14.0697	4.07041	0.771476	1
79197	7980766	NM_003485 // GPR68 /// ENST00000238699 // GPR68 /// BC098567 // GPR68	GPR68	NM_003485	0.000228506	0.00028545	2.20489	2.20489	CE up vs CB	0.00261499	1.74409	1.74409	CE up vs KE	24.2194	3.79541	0.417892	1
79346	7980974	NM_014216 // ITPK1 /// NM_001142593 // ITPK1 /// NM_001142594 // ITPK1 /// ENST0	ITPK1	NM_014216	8.74051e-09	6.65664e-08	2.18837	2.18837	CE up vs CB	0.00014861	1.32365	1.32365	CE up vs KE	342.495	5.57423	0.0434009	1
79904	7981605	ENST00000390543 // IGHG4 /// ENST00000390542 // IGHG4	IGHG4	ENST00000390543	0.000583915	0.000112238	7.08809	7.08809	CE up vs CB	0.00445666	2.98751	2.98751	CE up vs KE	18.5361	13.5754	1.953	1
80009	7981711	ENST00000390541 // IGHE /// ENST00000390540 // IGHE	IGHE	ENST00000390541	1.23494e-06	5.78508e-07	5.77911	5.77911	CE up vs CB	1.14787e-05	3.26602	3.26602	CE up vs KE	97.2553	13.838	0.379428	1
80713	7982603	NM_003246 // THBS1 /// ENST00000260356 // THBS1 /// BC136469 // THBS1 /// ENST00	THBS1	NM_003246	4.42888e-07	6.21529e-07	2.09746	2.09746	CE up vs CB	8.52711e-05	1.46605	1.46605	CE up vs KE	126.535	3.27015	0.0689171	1
81894	7983900	NM_001018090 // GCOM1 /// NM_001018100 // GCOM1 /// NM_152451 // GCOM1 /// NM_00	GCOM1	NM_001018090	0.00165984	0.00343279	3.32381	3.32381	CE up vs CB	0.755699	1.0989	1.0989	CE up vs KE	13.5918	10.9198	2.14243	1
82049	7984076	NM_015059 // TLN2 /// ENST00000306829 // TLN2 /// ENST00000442402 // TLN2	TLN2	NM_015059	0.000235006	7.86463e-05	3.02353	3.02353	CE up vs CB	0.500018	1.11192	1.11192	CE up vs KE	24.0295	5.0766	0.563375	1
82470	7984541	NM_138555 // KIF23 /// NM_004856 // KIF23 /// ENST00000260363 // KIF23 /// ENST0	KIF23	NM_138555	0.00336528	0.00884195	2.8021	2.8021	CE up vs CB	0.00631967	3.00227	3.00227	CE up vs KE	10.9067	9.1722	2.24259	1
82522	7984597	NM_024817 // THSD4 /// ENST00000355327 // THSD4 /// ENST00000261862 // THSD4 ///	THSD4	NM_024817	6.00881e-08	1.07896e-06	2.54931	2.54931	CE up vs CB	3.2306e-05	1.81234	1.81234	CE up vs KE	210.393	10.0154	0.126943	1
83577	7985775	NM_022767 // AEN /// ENST00000332810 // AEN /// BC020988 // AEN /// ENST00000379	AEN	NM_022767	0.000618768	0.000152264	2.202	2.202	CE up vs CB	0.461955	1.09526	1.09526	CE up vs KE	18.2267	2.36761	0.346395	1
84115	7986362	NM_000875 // IGF1R /// ENST00000268035 // IGF1R /// AB425196 // IGF1R /// ENST00	IGF1R	NM_000875	6.57291e-05	0.000232659	2.01818	2.01818	CE up vs CB	0.141643	0.833835	-1.19928	CE down vs KE	34.1515	3.97317	0.310239	1
84809	7987151	NM_001103184 // FMN1 /// ENST00000334528 // FMN1 /// ENST00000414268 // FMN1	FMN1	NM_001103184	2.66992e-07	1.59176e-06	2.33478	2.33478	CE up vs CB	0.000195575	1.55149	1.55149	CE up vs KE	143.997	6.22848	0.115344	1
85058	7987422	NM_005739 // RASGRP1 /// NM_001128602 // RASGRP1 /// ENST00000310803 // RASGRP1	RASGRP1	NM_005739	1.99448e-08	2.82746e-07	4.05888	4.05888	CE up vs CB	0.000380922	1.69109	1.69109	CE up vs KE	278.117	20.9788	0.201151	1
86113	7988566	NM_203349 // SHC4 /// ENST00000332408 // SHC4 /// BC033907 // SHC4 /// ENST00000	SHC4	NM_203349	6.5786e-05	0.000239926	2.31217	2.31217	CE up vs CB	0.0951829	0.776624	-1.28762	CE down vs KE	34.1435	5.71131	0.446064	1
86934	7989455	NM_017684 // VPS13C /// NM_018080 // VPS13C /// NM_020821 // VPS13C /// NM_00101	VPS13C	NM_017684	0.00131059	0.000300155	2.53031	2.53031	CE up vs CB	0.474322	1.12173	1.12173	CE up vs KE	14.5999	3.20152	0.584755	1
86975	7989503	NM_001218 // CA12 /// NM_206925 // CA12 /// ENST00000178638 // CA12 /// ENST0000	CA12	NM_001218	5.44624e-09	2.30837e-09	2.18525	2.18525	CE up vs CB	0.00088385	1.14995	1.14995	CE up vs KE	385.86	2.66924	0.018447	1
87682	7990270	BC111368 // C15orf59 /// ENST00000379822 // C15orf59	C15orf59	BC111368	0.00203451	0.00440974	2.75059	2.75059	CE up vs CB	0.000526353	4.21257	4.21257	CE up vs KE	12.7695	7.96268	1.66285	1
87814	7990413	NM_001099436 // ULK3 /// ENST00000440863 // ULK3 /// ENST00000418051 // ULK3 ///	ULK3	NM_001099436	0.00152648	0.00113626	2.61607	2.61607	CE up vs CB	0.0641083	1.51886	1.51886	CE up vs KE	13.9424	4.95048	0.946841	1
87840	7990443	NM_017793 // RPP25 /// ENST00000322177 // RPP25 /// BC002497 // RPP25	RPP25	NM_017793	0.000464446	7.81194e-05	2.6025	2.6025	CE up vs CB	0.0707923	1.31019	1.31019	CE up vs KE	19.8026	3.12052	0.420217	1
88119	7990752	NM_014272 // ADAMTS7 /// ENST00000388820 // ADAMTS7 /// BC061631 // ADAMTS7 ///	ADAMTS7	NM_014272	0.00102591	0.00115536	2.08079	2.08079	CE up vs CB	0.0120298	1.6172	1.6172	CE up vs KE	15.7096	3.25583	0.552668	1
91088	7994072	NM_001039 // SCNN1G /// ENST00000300061 // SCNN1G /// BC059391 // SCNN1G	SCNN1G	NM_001039	3.60511e-07	6.34771e-06	2.86276	2.86276	CE up vs CB	0.00413306	0.669374	-1.49393	CE down vs KE	133.37	12.7866	0.255661	1
91103	7994088	NM_000336 // SCNN1B /// ENST00000343070 // SCNN1B /// BC036352 // SCNN1B /// ENS	SCNN1B	NM_000336	0.00223724	0.00270419	4.19042	4.19042	CE up vs CB	0.0256085	2.5015	2.5015	CE up vs KE	12.3998	13.0434	2.80506	1
91856	7994917	NM_006662 // SRCAP /// ENST00000262518 // SRCAP /// BC159099 // SRCAP /// ENST00	SRCAP	NM_006662	0.00261242	0.0403935	2.05892	2.05892	CE up vs CB	0.0147554	0.400388	-2.49757	CE down vs KE	11.8149	9.67259	2.18314	1
92351	7995476	ENST00000405152 // HEATR3 /// ENST00000285767 // HEATR3 /// ENST00000401635 // H	HEATR3	ENST00000405152	0.00113655	0.00021181	3.30987	3.30987	CE up vs CB	0.192181	1.30586	1.30586	CE up vs KE	15.2373	5.01016	0.876824	1
92622	7995770	NM_018233 // OGFOD1 /// ENST00000336111 // OGFOD1 /// AB046832 // OGFOD1	OGFOD1	NM_018233	5.43191e-05	7.13243e-05	2.04703	2.04703	CE up vs CB	0.290094	0.897043	-1.11477	CE down vs KE	35.9629	3.09853	0.229758	1
93871	7997147	NR_027910 // CALB2 /// NM_001740 // CALB2 /// NM_007088 // CALB2 /// ENST0000034	CALB2	NR_027910	0.000525572	0.00146645	2.3595	2.3595	CE up vs CB	0.0363847	0.634661	-1.57564	CE down vs KE	19.1095	5.87393	0.819686	1
95617	7999092	NM_001116 // ADCY9 /// ENST00000294016 // ADCY9 /// BC151229 // ADCY9	ADCY9	NM_001116	0.000104589	0.000155426	2.56599	2.56599	CE up vs CB	0.0029774	1.80922	1.80922	CE up vs KE	30.0834	5.60246	0.496615	1
96138	7999681	NM_002474 // MYH11 /// NM_001040114 // MYH11 /// NM_022844 // MYH11 /// NM_00104	MYH11	NM_002474	0.000739176	0.00032746	2.27376	2.27376	CE up vs CB	0.000196287	2.42546	2.42546	CE up vs KE	17.3051	3.04932	0.469891	1
96651	8000246	NM_020718 // USP31 /// ENST00000219689 // USP31 /// AK092790 // USP31	USP31	NM_020718	0.00124283	0.0292979	2.20768	2.20768	CE up vs CB	0.0441021	2.04095	2.04095	CE up vs KE	14.8348	12.4177	2.23217	1
98704	8002544	NM_145911 // ZNF23 /// ENST00000357254 // ZNF23 /// ENST00000417828 // ZNF23 ///	ZNF23	NM_145911	3.49062e-06	2.35188e-06	2.64763	2.64763	CE up vs CB	0.0443137	1.21622	1.21622	CE up vs KE	74.3336	4.6964	0.16848	1
99394	8003305	NM_003486 // SLC7A5 /// ENST00000261622 // SLC7A5 /// AF104032 // SLC7A5	SLC7A5	NM_003486	1.71987e-05	1.07601e-05	2.12226	2.12226	CE up vs CB	0.527441	0.949979	-1.05265	CE down vs KE	48.9246	2.76525	0.150721	1
99581	8003509	NM_000135 // FANCA /// NM_001113525 // ZNF276 /// NM_152287 // ZNF276 /// ENST00	FANCA	NM_000135	0.00024506	0.00407868	2.43744	2.43744	CE up vs CB	0.162728	1.41119	1.41119	CE up vs KE	23.7483	11.1631	1.25349	1
99917	8003896	NM_001114974 // SMTNL2 /// NM_198501 // SMTNL2 /// ENST00000389313 // SMTNL2 ///	SMTNL2	NM_001114974	0.0022095	0.000532876	2.35559	2.35559	CE up vs CB	0.246613	1.21231	1.21231	CE up vs KE	12.4479	2.76573	0.592492	1
101031	8005100	NM_006041 // HS3ST3B1 /// ENST00000360954 // HS3ST3B1 /// BC063301 // HS3ST3B1	HS3ST3B1	NM_006041	0.000150477	0.000233327	2.56458	2.56458	CE up vs CB	0.0531895	0.712539	-1.40343	CE down vs KE	27.2113	5.69951	0.558543	1
101489	8005625	NM_018242 // SLC47A1 /// ENST00000270570 // SLC47A1 /// BC010661 // SLC47A1 ///	SLC47A1	NM_018242	0.00218513	0.00403831	2.96047	2.96047	CE up vs CB	0.00031927	5.14306	5.14306	CE up vs KE	12.4907	8.68203	1.85354	1
101631	8005807	NM_014238 // KSR1 /// ENST00000398988 // KSR1 /// ENST00000268763 // KSR1 /// EN	KSR1	NM_014238	0.00312213	0.00138264	2.10214	2.10214	CE up vs CB	0.898861	0.979834	-1.02058	CE down vs KE	11.1697	2.52262	0.602252	1
101711	8005899	NM_003593 // FOXN1 /// ENST00000226247 // FOXN1	FOXN1	NM_003593	0.00103269	0.000345012	4.30627	4.30627	CE up vs CB	0.033404	1.87794	1.87794	CE up vs KE	15.6789	8.86628	1.50798	1
102752	8007055	NM_016339 // RAPGEFL1 /// ENST00000436615 // RAPGEFL1 /// AF117946 // RAPGEFL1 /	RAPGEFL1	NM_016339	9.46651e-07	1.38283e-06	5.64814	5.64814	CE up vs CB	1.17043e-05	3.68681	3.68681	CE up vs KE	104.141	18.1022	0.463532	1
102770	8007076	NM_001254 // CDC6 /// ENST00000209728 // CDC6 /// BC025232 // CDC6	CDC6	NM_001254	1.86215e-06	3.34355e-06	2.07657	2.07657	CE up vs CB	0.0126119	0.813349	-1.22948	CE down vs KE	87.4779	3.41504	0.104104	1
102790	8007097	NM_000964 // RARA /// NM_001024809 // RARA /// NM_001145301 // RARA /// NM_00114	RARA	NM_000964	1.14251e-05	2.05306e-05	2.53869	2.53869	CE up vs CB	0.302264	1.1227	1.1227	CE up vs KE	54.5094	5.62564	0.275214	1
102799	8007107	NM_001552 // IGFBP4 /// ENST00000269593 // IGFBP4 /// BC016041 // IGFBP4	IGFBP4	NM_001552	7.45125e-09	1.13921e-08	5.84728	5.84728	CE up vs CB	0.00034277	1.56325	1.56325	CE up vs KE	356.556	18.8418	0.140917	1
105113	8009704	NM_017728 // TMEM104 /// ENST00000335464 // TMEM104	TMEM104	NM_017728	0.000767004	0.00146	2.14103	2.14103	CE up vs CB	0.0045905	1.86816	1.86816	CE up vs KE	17.1186	4.13224	0.643702	1
106902	8011660	NM_001105538 // MYBBP1A /// NM_014520 // MYBBP1A /// ENST00000254718 // MYBBP1A	MYBBP1A	NM_001105538	0.00168802	0.000258254	2.27223	2.27223	CE up vs CB	0.0901938	1.2903	1.2903	CE up vs KE	13.5222	2.21654	0.437117	1
106947	8011709	NM_014389 // PELP1 /// ENST00000456564 // PELP1 /// U88153 // PELP1 /// ENST0000	PELP1	NM_014389	0.00285588	0.000768302	2.64653	2.64653	CE up vs CB	0.71966	1.07128	1.07128	CE up vs KE	11.4888	3.68967	0.856411	1
108025	8012884	NM_006042 // HS3ST3A1 /// ENST00000284110 // HS3ST3A1 /// AF105376 // HS3ST3A1	HS3ST3A1	NM_006042	2.84057e-05	6.27471e-06	4.33444	4.33444	CE up vs CB	0.0304391	1.44726	1.44726	CE up vs KE	42.8094	7.95536	0.495553	1
108669	8013638	NM_005148 // UNC119 /// NM_054035 // UNC119 /// ENST00000335765 // UNC119 /// EN	UNC119	NM_005148	1.68044e-06	3.59773e-05	2.18296	2.18296	CE up vs CB	0.000395941	1.73833	1.73833	CE up vs KE	89.8289	7.59331	0.225415	1
111564	8016887	NM_017949 // CUEDC1 /// ENST00000407144 // CUEDC1 /// ENST00000360238 // CUEDC1	CUEDC1	NM_017949	0.00328739	0.0179498	2.6064	2.6064	CE up vs CB	0.0549408	2.06479	2.06479	CE up vs KE	10.9883	10.7281	2.60353	1
111750	8017086	NM_198393 // TEX14 /// NM_031272 // TEX14 /// ENST00000389934 // TEX14 /// ENST0	TEX14	NM_198393	0.000637878	0.00820378	2.41551	2.41551	CE up vs CB	0.0189992	0.476881	-2.09696	CE down vs KE	18.0661	10.8078	1.59529	1
112623	8018045	NM_018672 // ABCA5 /// NM_172232 // ABCA5 /// ENST00000320086 // ABCA5 /// ENST0	ABCA5	NM_018672	0.00328508	0.00969287	3.07684	3.07684	CE up vs CB	0.622624	0.843363	-1.18573	CE down vs KE	10.9907	11.406	2.76742	1
112716	8018148	NM_001144952 // SDK2 /// ENST00000409227 // SDK2 /// ENST00000392650 // SDK2 ///	SDK2	NM_001144952	4.02201e-05	1.10214e-05	8.41293	8.41293	CE up vs CB	0.000145899	4.42666	4.42666	CE up vs KE	38.999	17.772	1.21521	1
114477	8020117	NM_006868 // RAB31 /// ENST00000306096 // RAB31 /// AF183421 // RAB31 /// ENST00	RAB31	NM_006868	2.43586e-07	1.5025e-07	3.81473	3.81473	CE up vs CB	0.238744	1.10592	1.10592	CE up vs KE	147.407	8.63409	0.156196	1
114785	8020469	NM_002894 // RBBP8 /// ENST00000327174 // RBBP8 /// ENST00000327155 // RBBP8 ///	RBBP8	NM_002894	2.85517e-05	3.04291e-05	2.94581	2.94581	CE up vs CB	0.0752594	0.769102	-1.30022	CE down vs KE	42.7508	6.60852	0.41222	1
114930	8020623	NM_198129 // LAMA3 /// NM_000227 // LAMA3 /// NM_001127717 // LAMA3 /// NM_00112	LAMA3	NM_198129	8.32361e-05	0.000654064	2.04766	2.04766	CE up vs CB	0.00239189	0.559541	-1.78718	CE down vs KE	32.0244	5.30394	0.441658	1
115593	8021361	NM_004852 // ONECUT2 /// ENST00000262095 // ONECUT2	ONECUT2	NM_004852	4.5044e-05	8.80631e-05	2.236	2.236	CE up vs CB	0.173584	1.18034	1.18034	CE up vs KE	37.8277	4.36479	0.307696	1
115690	8021475	NM_021127 // PMAIP1 /// ENST00000316660 // PMAIP1 /// D90070 // PMAIP1 /// ENST0	PMAIP1	NM_021127	0.000515652	0.000224802	2.07993	2.07993	CE up vs CB	0.3113	1.13314	1.13314	CE up vs KE	19.215	2.407	0.334045	1
118754	8024904	NM_001048201 // UHRF1 /// NM_013282 // UHRF1 /// ENST00000262952 // UHRF1 /// EN	UHRF1	NM_001048201	5.56688e-05	0.000268867	2.23354	2.23354	CE up vs CB	0.00197167	1.80012	1.80012	CE up vs KE	35.7249	5.68087	0.424046	1
118766	8024917	NM_015015 // KDM4B /// ENST00000159111 // KDM4B /// BC136611 // KDM4B /// ENST00	KDM4B	NM_015015	1.08403e-06	0.0160539	2.06092	2.06092	CE up vs CB	1.26265e-05	9.53381	9.53381	CE up vs KE	100.574	53.2906	1.41297	1
119354	8025566	NM_001040664 // PPAN-P2RY11 /// NM_020230 // PPAN /// ENST00000253107 // PPAN //	PPAN-P2RY11	NM_001040664	0.000140041	7.68991e-05	2.16586	2.16586	CE up vs CB	0.542784	0.935695	-1.06872	CE down vs KE	27.7583	2.84299	0.273118	1
120135	8026434	NM_173483 // CYP4F22 /// ENST00000269703 // CYP4F22 /// BC093894 // CYP4F22	CYP4F22	NM_173483	7.48788e-05	0.000482659	3.58623	3.58623	CE up vs CB	0.000405343	3.71148	3.71148	CE up vs KE	32.962	15.7859	1.2771	1
120419	8026749	NM_133644 // GTPBP3 /// NM_032620 // GTPBP3 /// NM_001128855 // GTPBP3 /// ENST0	GTPBP3	NM_133644	0.000559544	0.000304342	2.22766	2.22766	CE up vs CB	0.581104	0.926757	-1.07903	CE down vs KE	18.7665	3.07594	0.437082	1
121650	8028125	NM_001083961 // WDR62 /// NM_173636 // WDR62 /// ENST00000401500 // WDR62 /// EN	WDR62	NM_001083961	0.000267672	0.00100445	2.1711	2.1711	CE up vs CB	0.0227135	1.54185	1.54185	CE up vs KE	23.1654	5.13801	0.591458	1
121834	8028337	---		---	0.00272076	0.00270931	2.56297	2.56297	CE up vs CB	0.0872222	1.53576	1.53576	CE up vs KE	11.6653	5.29803	1.21112	1
121835	8028338	NM_004823 // KCNK6 /// ENST00000263372 // KCNK6 /// AF117708 // KCNK6	KCNK6	NM_004823	3.57207e-06	1.26399e-05	2.35238	2.35238	CE up vs CB	0.100837	1.18214	1.18214	CE up vs KE	73.8893	5.63644	0.203419	1
123072	8029691	NM_012099 // CD3EAP /// ENST00000309424 // CD3EAP /// U86751 // CD3EAP /// ENST0	CD3EAP	NM_012099	1.61514e-05	9.91534e-06	2.31322	2.31322	CE up vs CB	0.334112	0.915751	-1.092	CE down vs KE	49.7458	3.41644	0.183141	1
123273	8029917	NM_018485 // GPR77 /// ENST00000257267 // GPR77 /// AB038237 // GPR77	GPR77	NM_018485	1.5497e-06	3.07087e-06	2.92188	2.92188	CE up vs CB	0.0356938	1.2665	1.2665	CE up vs KE	91.7266	7.53911	0.219176	1
123281	8029926	NM_014681 // DHX34 /// ENST00000328771 // DHX34	DHX34	NM_014681	0.000858007	0.000913941	2.16129	2.16129	CE up vs CB	0.139162	0.780752	-1.28082	CE down vs KE	16.5633	3.52342	0.567265	1
126240	8033262	NM_000064 // C3 /// ENST00000245907 // C3 /// BC150179 // C3	C3	NM_000064	9.29119e-06	0.000736184	2.04964	2.04964	CE up vs CB	8.17468e-06	3.90865	3.90865	CE up vs KE	57.557	9.9174	0.459482	1
127894	8035075	NM_052890 // PGLYRP2 /// ENST00000340880 // PGLYRP2 /// AK055882 // PGLYRP2 ///	PGLYRP2	NM_052890	2.83714e-05	8.94502e-06	10.2095	10.2095	CE up vs CB	0.000473847	3.76269	3.76269	CE up vs KE	42.8232	21.9564	1.36726	1
129457	8036838	NM_024877 // CNTD2 /// ENST00000430325 // CNTD2 /// ENST00000221818 // CNTD2 ///	CNTD2	NM_024877	0.00299594	0.00208142	2.27812	2.27812	CE up vs CB	0.00237037	2.23759	2.23759	CE up vs KE	11.3165	3.59502	0.847145	1
129692	8037108	NM_002088 // GRIK5 /// ENST00000262895 // GRIK5 /// AJ249209 // GRIK5 /// ENST00	GRIK5	NM_002088	0.00208107	0.000831866	3.41513	3.41513	CE up vs CB	0.000634335	3.60159	3.60159	CE up vs KE	12.6807	6.64984	1.39842	1
132550	8040330	NM_014668 // GREB1 /// ENST00000381486 // GREB1 /// ENST00000234142 // GREB1 ///	GREB1	NM_014668	7.39447e-09	2.50994e-08	4.25784	4.25784	CE up vs CB	0.00209042	1.35566	1.35566	CE up vs KE	357.244	15.5233	0.115875	1
132555	8040337	---		---	6.01541e-07	4.12641e-07	4.41213	4.41213	CE up vs CB	0.00570411	1.45266	1.45266	CE up vs KE	116.994	10.9217	0.24894	1
133192	8041050	NM_005253 // FOSL2 /// ENST00000264716 // FOSL2	FOSL2	NM_005253	7.6778e-05	0.000387956	2.02982	2.02982	CE up vs CB	0.00392497	0.61533	-1.62514	CE down vs KE	32.7378	4.50883	0.367267	1
133690	8041590	NM_138370 // SGK493 /// BC094697 // SGK493 /// BC110513 // SGK493 /// BC110514 /	SGK493	NM_138370	7.58122e-06	1.69426e-06	3.1344	3.1344	CE up vs CB	0.00263983	1.48634	1.48634	CE up vs KE	60.713	4.84572	0.212836	1
133861	8041776	NM_005400 // PRKCE /// ENST00000306156 // PRKCE /// BC109033 // PRKCE	PRKCE	NM_005400	6.67904e-06	9.96835e-06	2.21487	2.21487	CE up vs CB	0.000253585	1.65776	1.65776	CE up vs KE	62.7616	3.88086	0.164893	1
134673	8042687	NM_001130987 // DYSF /// NM_001130977 // DYSF /// NM_001130978 // DYSF /// NM_00	DYSF	NM_001130987	0.000635803	0.00115056	2.37042	2.37042	CE up vs CB	0.000310256	2.87795	2.87795	CE up vs KE	18.0832	5.1924	0.765703	1
134696	8042714	NM_006062 // SMYD5 /// ENST00000389501 // SMYD5 /// BC073806 // SMYD5	SMYD5	NM_006062	0.00223491	0.0011395	2.03261	2.03261	CE up vs CB	0.838597	0.970219	-1.0307	CE down vs KE	12.4038	2.39826	0.515596	1
136169	8044394	NM_006343 // MERTK /// ENST00000295408 // MERTK /// uc002thk.1 // MERTK	MERTK	NM_006343	0.000481284	0.00886575	3.53706	3.53706	CE up vs CB	0.00300729	0.213765	-4.67803	CE down vs KE	19.6008	24.8051	3.37472	1
136255	8044486	NM_019014 // POLR1B /// NM_001137604 // POLR1B /// ENST00000263331 // POLR1B ///	POLR1B	NM_019014	0.000324717	0.000104504	2.06668	2.06668	CE up vs CB	0.332711	1.11158	1.11158	CE up vs KE	21.9335	2.16257	0.262925	1
136955	8045295	NM_080386 // TUBA3D /// NM_006001 // TUBA3C /// NM_207312 // TUBA3E /// ENST0000	TUBA3D	NM_080386	2.98547e-08	2.73777e-08	6.57664	6.57664	CE up vs CB	0.00013397	1.84289	1.84289	CE up vs KE	251.157	18.8581	0.200226	1
137293	8045683	NM_194317 // LYPD6 /// ENST00000409381 // LYPD6 /// ENST00000334166 // LYPD6 ///	LYPD6	NM_194317	3.90622e-07	9.09967e-07	2.02864	2.02864	CE up vs CB	0.00130107	0.77516	-1.29006	CE down vs KE	130.664	3.39975	0.0693843	1
137354	8045750	NM_052905 // FMNL2 /// ENST00000288670 // FMNL2 /// ENST00000409430 // FMNL2 ///	FMNL2	NM_052905	1.51685e-05	5.6236e-05	2.23089	2.23089	CE up vs CB	0.680922	1.04532	1.04532	CE up vs KE	50.5794	5.11407	0.269626	1
138025	8046491	NM_031942 // CDCA7 /// ENST00000306721 // CDCA7 /// AK297245 // CDCA7 /// AK3009	CDCA7	NM_031942	5.33968e-06	3.11508e-06	2.72958	2.72958	CE up vs CB	0.00192267	1.48917	1.48917	CE up vs KE	66.5427	4.81486	0.192953	1
138636	8047165	NR_024415 // OBFC2A /// NM_001031716 // OBFC2A /// ENST00000425611 // OBFC2A ///	OBFC2A	NR_024415	4.05252e-05	8.59827e-06	2.17918	2.17918	CE up vs CB	0.0724041	1.17515	1.17515	CE up vs KE	38.9198	2.21946	0.152071	1
139765	8048423	NM_014640 // TTLL4 /// ENST00000392102 // TTLL4 /// ENST00000258398 // TTLL4 ///	TTLL4	NM_014640	0.00280922	0.00103764	2.23594	2.23594	CE up vs CB	0.642731	1.08046	1.08046	CE up vs KE	11.5485	2.78841	0.643872	1
141232	8050043	NM_015025 // MYT1L /// ENST00000428368 // MYT1L /// AF036943 // MYT1L /// BC1502	MYT1L	NM_015025	0.00109818	0.0117517	2.02096	2.02096	CE up vs CB	0.000269666	3.80271	3.80271	CE up vs KE	15.3943	6.76933	1.17261	1
141680	8050536	NM_001006657 // WDR35 /// NM_020779 // WDR35 /// ENST00000345530 // WDR35 /// EN	WDR35	NM_001006657	0.00101393	0.00027565	5.49058	5.49058	CE up vs CB	0.000960672	4.08053	4.08053	CE up vs KE	15.7645	11.3427	1.91868	1
143316	8052333	NM_033109 // PNPT1 /// ENST00000447944 // PNPT1 /// ENST00000450096 // PNPT1 ///	PNPT1	NM_033109	0.000556544	0.000277711	2.04189	2.04189	CE up vs CB	0.728563	0.959055	-1.04269	CE down vs KE	18.7958	2.38152	0.33788	1
143798	8052875	NM_003236 // TGFA /// NM_001099691 // TGFA /// ENST00000295400 // TGFA /// ENST0	TGFA	NM_003236	3.69214e-07	1.51903e-06	2.67278	2.67278	CE up vs CB	0.327374	0.921556	-1.08512	CE down vs KE	132.56	7.61434	0.153176	1
144356	8053505	NM_015425 // POLR1A /// ENST00000263857 // POLR1A /// BC117173 // POLR1A /// BC1	POLR1A	NM_015425	0.00146267	0.00157862	2.11341	2.11341	CE up vs CB	0.29131	0.834785	-1.19791	CE down vs KE	14.124	3.37979	0.638117	1
145130	8054381	NM_001450 // FHL2 /// NM_201555 // FHL2 /// NM_201557 // FHL2 /// NM_001039492 /	FHL2	NM_001450	4.67389e-08	3.17852e-08	4.8306	4.8306	CE up vs CB	0.144471	1.13134	1.13134	CE up vs KE	224.221	12.2266	0.145412	1
149160	8058825	NM_018000 // MREG /// ENST00000263268 // MREG /// ENST00000423087 // MREG /// BC	MREG	NM_018000	6.45615e-06	6.28993e-06	2.15165	2.15165	CE up vs CB	0.489714	0.9481	-1.05474	CE down vs KE	63.3215	3.21409	0.135355	1
149633	8059338	NM_005687 // FARSB /// ENST00000281828 // FARSB /// D84430 // FARSB	FARSB	NM_005687	0.000918278	0.000408118	2.19243	2.19243	CE up vs CB	0.671517	0.942112	-1.06144	CE down vs KE	16.2346	2.79159	0.458542	1
150674	8060493	NR_027700 // NOP56 /// NM_006392 // NOP56 /// ENST00000329276 // NOP56 /// ENST0	NOP56	NR_027700	0.00250376	0.000619559	2.07021	2.07021	CE up vs CB	0.188471	1.21224	1.21224	CE up vs KE	11.9729	2.00996	0.447667	1
150905	8060750	NM_175839 // SMOX /// NM_175840 // SMOX /// NM_175842 // SMOX /// ENST0000030595	SMOX	NM_175839	0.000110809	0.000188519	2.58381	2.58381	CE up vs CB	0.0541625	1.39013	1.39013	CE up vs KE	29.6097	5.91866	0.533038	1
151727	8061679	NM_002110 // HCK /// ENST00000262651 // HCK /// ENST00000375862 // HCK /// AK290	HCK	NM_002110	0.000997831	0.00240922	2.37605	2.37605	CE up vs CB	0.000377912	3.20002	3.20002	CE up vs KE	15.8397	5.8425	0.983605	1
153272	8063384	NM_005985 // SNAI1 /// ENST00000244050 // SNAI1 /// AF125377 // SNAI1	SNAI1	NM_005985	0.000450404	0.000145129	2.63441	2.63441	CE up vs CB	0.00439763	1.75604	1.75604	CE up vs KE	19.978	3.85401	0.514434	1
153611	8063773	NM_177980 // CDH26 /// ENST00000348616 // CDH26 /// BC136306 // CDH26 /// ENST00	CDH26	NM_177980	0.00200717	0.00220144	3.92827	3.92827	CE up vs CB	0.0769559	1.87184	1.87184	CE up vs KE	12.8229	11.464	2.38407	1
155992	8066440	NM_000022 // ADA /// ENST00000372874 // ADA /// BC040226 // ADA	ADA	NM_000022	0.00208914	0.000484082	3.03657	3.03657	CE up vs CB	0.00304993	2.2792	2.2792	CE up vs KE	12.6655	4.59233	0.966894	1
156377	8066868	NM_020820 // PREX1 /// ENST00000371941 // PREX1 /// ENST00000396223 // PREX1 ///	PREX1	NM_020820	5.72256e-06	4.41571e-06	2.20082	2.20082	CE up vs CB	0.00669862	1.30001	1.30001	CE up vs KE	65.3501	3.2001	0.130583	1
156626	8067143	NM_000782 // CYP24A1 /// NM_001128915 // CYP24A1 /// ENST00000395955 // CYP24A1	CYP24A1	NM_000782	0.000860569	0.00513216	2.40279	2.40279	CE up vs CB	0.00453769	2.45127	2.45127	CE up vs KE	16.5488	8.18768	1.31936	1
157945	8068640	NM_006057 // B3GALT5 /// NM_033170 // B3GALT5 /// NM_033171 // B3GALT5 /// NM_03	B3GALT5	NM_006057	0.000157153	0.00558178	2.18632	2.18632	CE up vs CB	0.000918674	2.89898	2.89898	CE up vs KE	26.8857	10.9258	1.08368	1
158782	8069555	NM_003489 // NRIP1 /// ENST00000400202 // NRIP1 /// ENST00000400199 // NRIP1 ///	NRIP1	NM_003489	1.52864e-05	5.02498e-06	2.10174	2.10174	CE up vs CB	0.0677494	1.15745	1.15745	CE up vs KE	50.4759	2.26793	0.119816	1
159086	8069907	NM_003253 // TIAM1 /// ENST00000286827 // TIAM1 /// U16296 // TIAM1 /// ENST0000	TIAM1	NM_003253	0.00225183	0.00145254	2.37441	2.37441	CE up vs CB	0.0347458	1.58832	1.58832	CE up vs KE	12.3748	3.84777	0.82916	1
159125	8069949	NM_014825 // URB1 /// ENST00000382751 // URB1	URB1	NM_014825	3.99038e-05	2.12616e-05	3.08972	3.08972	CE up vs CB	0.220808	1.18484	1.18484	CE up vs KE	39.0819	5.97029	0.407369	1
159279	8070115	NM_000819 // GART /// NM_175085 // GART /// NM_001136005 // GART /// NM_00113600	GART	NM_000819	0.000251147	0.000122509	2.62764	2.62764	CE up vs CB	0.533947	0.913213	-1.09503	CE down vs KE	23.585	4.31013	0.487331	1
159551	8070417	NR_026543 // C21orf88 /// ENST00000329618 // C21orf88	C21orf88	NR_026543	4.18737e-05	0.000177262	2.20792	2.20792	CE up vs CB	5.52215e-05	2.54804	2.54804	CE up vs KE	38.5786	5.27314	0.364495	1
159706	8070585	NM_024022 // TMPRSS3 /// NR_027348 // TMPRSS3 /// ENST00000291532 // TMPRSS3 ///	TMPRSS3	NM_024022	0.00266516	0.00160508	6.29751	6.29751	CE up vs CB	0.0973315	2.09565	2.09565	CE up vs KE	11.7411	17.0834	3.88002	1
161249	8072337	NM_012429 // SEC14L2 /// NM_033382 // SEC14L2 /// CR456571 // SEC14L2 /// AK3037	SEC14L2	NM_012429	0.000441282	0.000139617	3.59629	3.59629	CE up vs CB	0.00438095	2.09666	2.09666	CE up vs KE	20.0957	6.69299	0.888151	1
161727	8072874	NM_020315 // PDXP /// ENST00000215904 // PDXP /// BC064922 // PDXP /// BC000320	PDXP	NM_020315	0.00151954	0.000903375	2.11833	2.11833	CE up vs CB	0.0760374	1.34774	1.34774	CE up vs KE	13.9617	2.80691	0.536116	1
164115	8075557	NM_001010859 // C22orf42 /// ENST00000382097 // C22orf42 /// CR456485 // C22orf4	C22orf42	NM_001010859	0.00171553	0.00660302	2.5628	2.5628	CE up vs CB	0.0578716	1.77218	1.77218	CE up vs KE	13.4556	8.43109	1.6709	1
164197	8075647	NM_004737 // LARGE /// NM_133642 // LARGE /// ENST00000354992 // LARGE /// ENST0	LARGE	NM_004737	8.56057e-05	1.84227e-05	2.31004	2.31004	CE up vs CB	0.00157688	1.54536	1.54536	CE up vs KE	31.7798	2.57194	0.215813	1
164424	8075901	NM_031910 // C1QTNF6 /// NM_182486 // C1QTNF6 /// ENST00000337843 // C1QTNF6 ///	C1QTNF6	NM_031910	3.48183e-05	2.13791e-05	2.73712	2.73712	CE up vs CB	0.24365	1.1544	1.1544	CE up vs KE	40.5391	4.94137	0.325044	1
164955	8076507	NM_017436 // A4GALT /// ENST00000249005 // A4GALT /// ENST00000381278 // A4GALT	A4GALT	NM_017436	1.32492e-05	6.4779e-06	4.17914	4.17914	CE up vs CB	0.0272356	1.45049	1.45049	CE up vs KE	52.4206	9.34178	0.475222	1
165138	8076709	NM_148674 // SMC1B /// ENST00000357450 // SMC1B /// ENST00000404845 // SMC1B ///	SMC1B	NM_148674	0.000570951	0.000263926	3.5855	3.5855	CE up vs CB	0.32708	1.24051	1.24051	CE up vs KE	18.6571	7.44983	1.06481	1
167685	8079505	NM_015175 // NBEAL2 /// ENST00000450053 // NBEAL2 /// AK301269 // NBEAL2 /// AK2	NBEAL2	NM_015175	0.00177758	0.00211155	2.22618	2.22618	CE up vs CB	0.000332455	2.92185	2.92185	CE up vs KE	13.3103	4.01424	0.804239	1
168123	8079982	NM_004636 // SEMA3B /// NM_001005914 // SEMA3B /// ENST00000414456 // SEMA3B ///	SEMA3B	NM_004636	0.00103981	0.00968763	2.49058	2.49058	CE up vs CB	0.0197324	2.1926	2.1926	CE up vs KE	15.6469	10.7019	1.8239	1
168476	8080360	NM_015136 // STAB1 /// ENST00000321725 // STAB1 /// AB052956 // STAB1	STAB1	NM_015136	0.000605363	0.00045248	2.50376	2.50376	CE up vs CB	0.00223655	2.0354	2.0354	CE up vs KE	18.343	4.44855	0.646719	1
168550	8080436	NM_014366 // GNL3 /// NM_206825 // GNL3 /// NM_206826 // GNL3 /// ENST0000041845	GNL3	NM_014366	0.000547098	0.000705841	2.77291	2.77291	CE up vs CB	0.0885304	0.689882	-1.44952	CE down vs KE	18.8891	6.48738	0.915856	1
168684	8080577	NM_018725 // IL17RB /// ENST00000288167 // IL17RB	IL17RB	NM_018725	0.00218996	0.0071031	2.24417	2.24417	CE up vs CB	0.10616	0.663563	-1.50702	CE down vs KE	12.4822	5.93316	1.26755	1
171265	8083483	NM_015595 // SGEF /// ENST00000356448 // SGEF /// AF415175 // SGEF	SGEF	NM_015595	2.84844e-05	2.2564e-05	2.42086	2.42086	CE up vs CB	0.0522147	1.25847	1.25847	CE up vs KE	42.7778	4.07974	0.254321	1
171268	8083486				0.00149181	0.0011948	2.58802	2.58802	CE up vs CB	0.583456	1.11727	1.11727	CE up vs KE	14.0399	4.95357	0.940856	1
171458	8083695	NM_000882 // IL12A /// ENST00000305579 // IL12A /// M65291 // IL12A	IL12A	NM_000882	0.000396014	0.000696314	2.18304	2.18304	CE up vs CB	0.73842	0.950678	-1.05188	CE down vs KE	20.7282	4.15387	0.534393	1
171937	8084245	NM_018023 // YEATS2 /// ENST00000421660 // YEATS2 /// ENST00000305135 // YEATS2	YEATS2	NM_018023	0.00106891	0.000418048	2.56985	2.56985	CE up vs CB	0.272412	1.21253	1.21253	CE up vs KE	15.5188	3.88582	0.667718	1
173141	8085587	NM_005677 // COLQ /// NM_080538 // COLQ /// NM_080539 // COLQ /// NM_080541 // C	COLQ	NM_005677	0.000333983	5.10319e-05	5.7258	5.7258	CE up vs CB	0.00329902	2.51074	2.51074	CE up vs KE	21.759	10.1262	1.24101	1
174327	8086895	NM_001789 // CDC25A /// NM_201567 // CDC25A /// ENST00000302506 // CDC25A /// EN	CDC25A	NM_001789	0.000611289	0.000479541	2.82935	2.82935	CE up vs CB	0.0550613	1.51114	1.51114	CE up vs KE	18.2912	5.79819	0.845315	1
174585	8087164	NM_001407 // CELSR3 /// ENST00000164024 // CELSR3 /// AF231023 // CELSR3	CELSR3	NM_001407	0.00207299	0.00415496	3.19997	3.19997	CE up vs CB	0.220619	0.677142	-1.4768	CE down vs KE	12.6959	10.2393	2.15068	1
175720	8088401	NM_003500 // ACOX2 /// ENST00000302819 // ACOX2 /// BC047700 // ACOX2	ACOX2	NM_003500	0.000101666	0.0155618	2.19198	2.19198	CE up vs CB	0.000231391	5.03668	5.03668	CE up vs KE	30.3184	18.6681	1.64196	1
175898	8088598	NM_182920 // ADAMTS9 /// ENST00000295903 // ADAMTS9 /// BC130578 // ADAMTS9 ///	ADAMTS9	NM_182920	0.00278874	0.02654	2.52658	2.52658	CE up vs CB	0.951175	1.02182	1.02182	CE up vs KE	11.5751	12.6551	2.91547	1
176049	8088763	NM_015123 // FRMD4B /// ENST00000398540 // FRMD4B	FRMD4B	NM_015123	0.000558395	0.000185741	2.67876	2.67876	CE up vs CB	0.000347737	2.45484	2.45484	CE up vs KE	18.7777	4.0268	0.571855	1
178324	8091303	NM_182943 // PLOD2 /// NM_000935 // PLOD2 /// ENST00000360060 // PLOD2 /// ENST0	PLOD2	NM_182943	6.53297e-06	3.02189e-05	2.0028	2.0028	CE up vs CB	0.000802457	1.53836	1.53836	CE up vs KE	63.1258	4.02519	0.170039	1
178487	8091487	NM_005067 // SIAH2 /// ENST00000312960 // SIAH2 /// U76248 // SIAH2	SIAH2	NM_005067	6.59852e-06	2.64846e-06	2.07914	2.07914	CE up vs CB	0.0369906	1.16968	1.16968	CE up vs KE	62.9611	2.31932	0.098233	1
179278	8092388	NM_015078 // MCF2L2 /// ENST00000328913 // MCF2L2 /// ENST00000447025 // MCF2L2	MCF2L2	NM_015078	0.00162925	0.00460422	2.07678	2.07678	CE up vs CB	0.0010124	2.57299	2.57299	CE up vs KE	13.669	4.51699	0.881213	1
179399	8092521	BC137178 // C3orf70 /// NM_001025266 // C3orf70 /// ENST00000335012 // C3orf70	C3orf70	BC137178	4.19115e-08	3.74894e-08	2.13811	2.13811	CE up vs CB	0.000593927	1.22836	1.22836	CE up vs KE	230.497	3.05154	0.0353038	1
179517	8092652	NM_002916 // RFC4 /// ENST00000296273 // RFC4 /// BC017452 // RFC4 /// BC024022	RFC4	NM_002916	0.000453473	0.00023811	2.24069	2.24069	CE up vs CB	0.0548519	1.33465	1.33465	CE up vs KE	19.9391	3.08314	0.412342	1
181957	8095393	NM_001075 // UGT2B10 /// NM_001144767 // UGT2B10 /// ENST00000458688 // UGT2B10	UGT2B10	NM_001075	0.000970886	0.00146452	2.156	2.156	CE up vs CB	0.908289	0.980913	-1.01946	CE down vs KE	15.9689	3.92958	0.656206	1
182166	8095634	NM_000477 // ALB /// ENST00000295897 // ALB /// AY550967 // ALB /// BC034023 //	ALB	NM_000477	0.00063984	0.00137435	2.18298	2.18298	CE up vs CB	0.199424	0.796109	-1.25611	CE down vs KE	18.05	4.49228	0.663681	1
182259	8095738	NM_001657 // AREG /// BC009799 // AREG	AREG	NM_001657	0.000759978	0.00082411	2.14881	2.14881	CE up vs CB	0.182997	0.806933	-1.23926	CE down vs KE	17.1649	3.48101	0.540796	1
184410	8098149	NM_006174 // NPY5R /// ENST00000338566 // NPY5R /// BC042416 // NPY5R	NPY5R	NM_006174	4.49908e-05	0.000220387	2.46554	2.46554	CE up vs CB	0.276356	0.847053	-1.18056	CE down vs KE	37.8398	7.15553	0.504269	1
184510	8098270	NM_016081 // PALLD /// ENST00000261509 // PALLD /// AF464873 // PALLD /// ENST00	PALLD	NM_016081	0.000184103	0.000821941	2.11241	2.11241	CE up vs CB	0.0151119	0.642148	-1.55727	CE down vs KE	25.7279	4.98293	0.516476	1
186713	8100744	NM_001076 // UGT2B15 /// NM_001077 // UGT2B17 /// ENST00000338206 // UGT2B15 ///	UGT2B15	NM_001076	3.29851e-07	1.04619e-06	2.85266	2.85266	CE up vs CB	0.00923283	1.31149	1.31149	CE up vs KE	136.433	8.08381	0.158003	1
186724	8100759	NM_001074 // UGT2B7 /// ENST00000305231 // UGT2B7 /// J05428 // UGT2B7	UGT2B7	NM_001074	4.47091e-06	3.0831e-05	3.81924	3.81924	CE up vs CB	0.25506	1.21618	1.21618	CE up vs KE	69.6969	16.6353	0.63648	1
187357	8101469	NM_133636 // HELQ /// ENST00000295488 // HELQ /// AF436845 // HELQ	HELQ	NM_133636	0.000475255	0.000433435	4.10235	4.10235	CE up vs CB	0.503909	0.841934	-1.18774	CE down vs KE	19.672	11.1386	1.5099	1
187567	8101700	---		---	0.000111927	0.000190403	2.66716	2.66716	CE up vs CB	0.0340459	1.47095	1.47095	CE up vs KE	29.5281	6.32213	0.570948	1
187579	8101713	NM_152542 // PPM1K /// ENST00000295908 // PPM1K /// AY157615 // PPM1K /// ENST00	PPM1K	NM_152542	0.0024092	0.00149931	2.64813	2.64813	CE up vs CB	0.0473226	1.62078	1.62078	CE up vs KE	12.1176	4.82848	1.06258	1
187828	8101996	NM_022154 // SLC39A8 /// NM_001135146 // SLC39A8 /// NM_001135147 // SLC39A8 ///	SLC39A8	NM_022154	9.71024e-05	3.42574e-05	2.15081	2.15081	CE up vs CB	0.580229	1.0548	1.0548	CE up vs KE	30.7026	2.46405	0.214014	1
188672	8102943	NM_020724 // RNF150 /// ENST00000306799 // RNF150 /// ENST00000420921 // RNF150	RNF150	NM_020724	0.00150687	0.0026201	2.25307	2.25307	CE up vs CB	0.074518	0.678854	-1.47307	CE down vs KE	13.9972	4.68099	0.891796	1
189091	8103420	NM_001031700 // C4orf18 /// NM_016613 // C4orf18 /// NM_001128424 // C4orf18 ///	C4orf18	NM_001031700	4.69569e-06	5.58512e-05	2.05684	2.05684	CE up vs CB	0.000190886	0.546019	-1.83144	CE down vs KE	68.8115	5.60937	0.217381	1
189158	8103500	NM_000909 // NPY1R /// ENST00000296533 // NPY1R /// L07615 // NPY1R	NPY1R	NM_000909	9.18776e-10	1.21414e-09	5.50854	5.50854	CE up vs CB	0.000365979	0.724551	-1.38016	CE down vs KE	603.721	16.9228	0.0747489	1
189244	8103600	NM_017631 // DDX60 /// ENST00000393743 // DDX60 /// BC038115 // DDX60	DDX60	NM_017631	0.00295855	0.0248715	2.49585	2.49585	CE up vs CB	0.0156935	0.362625	-2.75767	CE down vs KE	11.3615	11.7297	2.75309	1
190297	8104805	NM_015577 // RAI14 /// NM_001145520 // RAI14 /// NM_001145521 // RAI14 /// NM_00	RAI14	NM_015577	0.000196403	0.000141467	2.41723	2.41723	CE up vs CB	0.00505523	1.64595	1.64595	CE up vs KE	25.2678	4.01727	0.423967	1
191579	8106222	NM_001080479 // RGNEF /// ENST00000296794 // RGNEF /// BC157846 // RGNEF /// BC1	RGNEF	NM_001080479	0.0016025	0.0150275	2.19473	2.19473	CE up vs CB	0.128256	1.54093	1.54093	CE up vs KE	13.7381	8.35974	1.62269	1
192077	8106775	NR_003719 // NBPF22P /// BC050328 // NBPF22P	NBPF22P	NR_003719	0.00196895	0.00405557	2.11502	2.11502	CE up vs CB	0.307787	1.22745	1.22745	CE up vs KE	12.899	4.27715	0.88423	1
192122	8106826	NM_006467 // POLR3G /// ENST00000399107 // POLR3G /// AK295434 // POLR3G	POLR3G	NM_006467	0.00149043	0.00085947	2.6227	2.6227	CE up vs CB	0.794896	0.951051	-1.05147	CE down vs KE	14.0438	4.58584	0.870768	1
192852	8107636	NM_014035 // SNX24 /// ENST00000261369 // SNX24 /// BC069012 // SNX24 /// ENST00	SNX24	NM_014035	1.90905e-06	4.40628e-06	2.19099	2.19099	CE up vs CB	0.010479	1.26986	1.26986	CE up vs KE	86.9174	4.20563	0.129031	1
193115	8107926	NM_003060 // SLC22A5 /// ENST00000245407 // SLC22A5 /// AF057164 // SLC22A5 ///	SLC22A5	NM_003060	4.20917e-06	1.63015e-06	2.44092	2.44092	CE up vs CB	0.00504182	1.31592	1.31592	CE up vs KE	70.8007	3.41318	0.128556	1
194262	8109198	NM_000112 // SLC26A2 /// ENST00000286298 // SLC26A2 /// BC059390 // SLC26A2	SLC26A2	NM_000112	3.02165e-09	8.25673e-09	2.57819	2.57819	CE up vs CB	0.00523481	0.863316	-1.15832	CE down vs KE	447.553	6.26996	0.0373585	1
194789	8109795	NM_001161661 // WWC1 /// NM_001161662 // WWC1 /// NM_015238 // WWC1 /// ENST0000	WWC1	NM_001161661	0.000990123	0.00369869	2.02154	2.02154	CE up vs CB	0.0337218	0.640842	-1.56045	CE down vs KE	15.8762	4.49758	0.755442	1
196676	8111888	NM_001005473 // PLCXD3 /// ENST00000377801 // PLCXD3 /// ENST00000328457 // PLCX	PLCXD3	NM_001005473	0.0012778	0.000224107	2.79323	2.79323	CE up vs CB	0.130836	1.31378	1.31378	CE up vs KE	14.7116	3.62236	0.656597	1
196912	8112155	NM_002184 // IL6ST /// NM_175767 // IL6ST /// ENST00000381298 // IL6ST /// ENST0	IL6ST	NM_002184	1.25569e-07	9.86248e-08	2.29207	2.29207	CE up vs CB	0.132775	0.925255	-1.08078	CE down vs KE	174.493	3.52203	0.0538249	1
197747	8113135	NM_024717 // MCTP1 /// NM_001002796 // MCTP1 /// ENST00000312216 // MCTP1 /// EN	MCTP1	NM_024717	0.00330933	0.00938761	2.17844	2.17844	CE up vs CB	0.00463885	2.43585	2.43585	CE up vs KE	10.965	5.39205	1.31133	1
198229	8113682	NM_020796 // SEMA6A /// ENST00000343348 // SEMA6A /// BC032619 // SEMA6A /// ENS	SEMA6A	NM_020796	0.000527949	0.0427382	2.1111	2.1111	CE up vs CB	0.00296469	0.27077	-3.69317	CE down vs KE	19.0846	17.2322	2.40783	1
198629	8114125	NM_015082 // FSTL4 /// ENST00000265342 // FSTL4 /// BC024300 // FSTL4 /// ENST00	FSTL4	NM_015082	1.63003e-07	6.75897e-05	2.27573	2.27573	CE up vs CB	1.65509e-06	0.257604	-3.88193	CE down vs KE	163.289	18.2576	0.298164	1
199771	8115400	NM_032385 // C5orf4 /// ENST00000326080 // C5orf4 /// ENST00000423554 // C5orf4	C5orf4	NM_032385	0.000482657	0.00429778	2.27477	2.27477	CE up vs CB	0.000270596	3.61597	3.61597	CE up vs KE	19.5847	7.98304	1.08698	1
199783	8115413	ENST00000285873 // GEMIN5	GEMIN5	ENST00000285873	0.00204917	0.00824301	3.27388	3.27388	CE up vs CB	0.0377164	0.42916	-2.33013	CE down vs KE	12.7413	13.81	2.89036	1
200177	8115855	NM_003714 // STC2 /// ENST00000265087 // STC2 /// BC000658 // STC2	STC2	NM_003714	4.9697e-07	4.80945e-06	2.08008	2.08008	CE up vs CB	0.0684566	0.866846	-1.15361	CE down vs KE	122.858	5.30514	0.115149	1
200223	8115910	NM_016391 // NOP16 /// ENST00000389158 // NOP16 /// AF151875 // NOP16 /// ENST00	NOP16	NM_016391	0.00218394	0.000627475	3.37053	3.37053	CE up vs CB	0.158093	1.41731	1.41731	CE up vs KE	12.4929	5.87105	1.25321	1
200926	8116695	NM_003913 // PRPF4B /// ENST00000337659 // PRPF4B	PRPF4B	NM_003913	0.000365717	0.000333253	3.33428	3.33428	CE up vs CB	0.000179637	3.74088	3.74088	CE up vs KE	21.2043	8.07283	1.01524	1
201238	8117051	NM_001143942 // RBM24 /// NM_153020 // RBM24 /// NM_001143941 // RBM24 /// ENST0	RBM24	NM_001143942	5.36695e-06	2.57032e-05	3.55701	3.55701	CE up vs CB	0.321696	0.855792	-1.16851	CE down vs KE	66.4543	13.529	0.542888	1
201896	8117833	NM_170783 // ZNRD1 /// NM_014596 // ZNRD1 /// ENST00000376782 // ZNRD1 /// ENST0	ZNRD1	NM_170783	0.00198095	0.00150942	2.58118	2.58118	CE up vs CB	0.000387299	3.23527	3.23527	CE up vs KE	12.8749	4.87475	1.00966	1
202144	8118107	AK299135 // MICA /// ENST00000376222 // MICA /// ENST00000451012 // MICA /// ENS	MICA	AK299135	0.00282824	0.00534264	2.15723	2.15723	CE up vs CB	0.0343825	1.67707	1.67707	CE up vs KE	11.524	4.45116	1.03	1
203858	8119986	NM_001078177 // SLC29A1 /// NM_001078175 // SLC29A1 /// NM_001078176 // SLC29A1	SLC29A1	NM_001078177	0.00280256	0.00190929	2.26718	2.26718	CE up vs CB	0.020798	1.6788	1.6788	CE up vs KE	11.5572	3.5249	0.813325	1
203920	8120053	NM_001024630 // RUNX2 /// NM_001015051 // RUNX2 /// NM_004348 // RUNX2 /// ENST0	RUNX2	NM_001024630	0.000264847	0.001643	2.26299	2.26299	CE up vs CB	0.00680483	0.529786	-1.88755	CE down vs KE	23.2348	6.71054	0.770171	1
204033	8120179	NM_001145652 // C6orf141 /// AK054918 // C6orf141	C6orf141	NM_001145652	0.000509869	0.000930986	2.41829	2.41829	CE up vs CB	0.499656	0.884763	-1.13025	CE down vs KE	19.2776	5.41533	0.749102	1
204528	8120728	NM_133493 // CD109 /// NM_001159587 // CD109 /// NM_001159588 // CD109 /// ENST0	CD109	NM_133493	0.00275735	0.0396432	2.17656	2.17656	CE up vs CB	0.000930423	5.03143	5.03143	CE up vs KE	11.6164	10.922	2.50725	1
205437	8121778	NM_181795 // PKIB /// NM_181794 // PKIB /// NM_032471 // PKIB /// ENST0000039249	PKIB	NM_181795	4.97383e-07	1.14836e-06	2.93107	2.93107	CE up vs CB	0.00573941	1.36144	1.36144	CE up vs KE	122.832	7.84753	0.170368	1
205498	8121846	NM_003287 // TPD52L1 /// NM_001003395 // TPD52L1 /// NM_001003396 // TPD52L1 ///	TPD52L1	NM_003287	4.79118e-09	1.85159e-08	2.1602	2.1602	CE up vs CB	3.99732e-05	1.32598	1.32598	CE up vs KE	398.517	4.53049	0.0303156	1
205505	8121854	NM_012259 // HEY2 /// ENST00000368364 // HEY2 /// AK289943 // HEY2 /// ENST00000	HEY2	NM_012259	0.00268209	0.00118144	3.34293	3.34293	CE up vs CB	0.694207	1.10544	1.10544	CE up vs KE	11.7178	6.63536	1.51004	1
205827	8122211	NM_001130173 // MYB /// NM_005375 // MYB /// NM_001130172 // MYB /// NM_00116165	MYB	NM_001130173	3.53681e-08	6.89135e-08	2.10327	2.10327	CE up vs CB	2.95417e-05	1.39884	1.39884	CE up vs KE	240.617	3.56083	0.0394633	1
206518	8122984	NM_024630 // ZDHHC14 /// ENST00000359775 // ZDHHC14 /// AF542388 // ZDHHC14 ///	ZDHHC14	NM_024630	0.00286784	0.000720595	3.03317	3.03317	CE up vs CB	0.187819	1.35118	1.35118	CE up vs KE	11.4737	4.69451	1.09108	1
207370	8123926	NM_017770 // ELOVL2 /// ENST00000354666 // ELOVL2 /// BC050278 // ELOVL2	ELOVL2	NM_017770	1.9183e-07	6.85298e-07	5.09043	5.09043	CE up vs CB	0.000559636	1.90653	1.90653	CE up vs KE	156.658	20.0428	0.341173	1
207731	8124339	NM_005074 // SLC17A1 /// ENST00000377886 // SLC17A1 /// ENST00000244527 // SLC17	SLC17A1	NM_005074	1.67067e-05	2.69168e-06	2.0661	2.0661	CE up vs CB	4.23349e-05	1.64973	1.64973	CE up vs KE	49.3024	1.7927	0.0969637	1
208691	8125438	NM_002125 // HLA-DRB5 /// M20429 // HLA-DRB5	HLA-DRB5	NM_002125	0.00276298	0.00399631	2.12849	2.12849	CE up vs CB	0.757336	0.941279	-1.06238	CE down vs KE	11.609	3.8943	0.894549	1
209342	8126155	NM_003740 // KCNK5 /// ENST00000359534 // KCNK5 /// BC060793 // KCNK5	KCNK5	NM_003740	7.44924e-06	1.76016e-05	3.09614	3.09614	CE up vs CB	0.069743	1.29814	1.29814	CE up vs KE	60.9931	8.88296	0.388371	1
210713	8127679	NM_001563 // IMPG1 /// ENST00000369950 // IMPG1 /// AF047492 // IMPG1 /// ENST00	IMPG1	NM_001563	0.00219348	0.0200233	2.04495	2.04495	CE up vs CB	0.165862	1.4574	1.4574	CE up vs KE	12.476	7.13172	1.52436	1
211147	8128161	NM_014611 // MDN1 /// ENST00000428876 // MDN1 /// ENST00000369393 // MDN1 /// AF	MDN1	NM_014611	0.000930841	0.00286256	2.00549	2.00549	CE up vs CB	0.0426414	0.673132	-1.48559	CE down vs KE	16.1694	4.09192	0.674841	1
211979	8129077	NM_002031 // FRK /// ENST00000368626 // FRK /// U00803 // FRK	FRK	NM_002031	6.22169e-06	4.04209e-05	2.13957	2.13957	CE up vs CB	0.0830256	1.20473	1.20473	CE up vs KE	63.9371	5.29834	0.220981	1
212529	8129684	NM_005627 // SGK1 /// NM_001143676 // SGK1 /// NM_001143677 // SGK1 /// NM_00114	SGK1	NM_005627	0.000128817	0.000303125	3.00871	3.00871	CE up vs CB	0.0280547	0.614629	-1.627	CE down vs KE	28.4066	8.79549	0.825677	1
212726	8129898	ENST00000427025 // NHSL1 /// ENST00000342260 // NHSL1	NHSL1	ENST00000427025	0.000197467	0.00415953	2.63928	2.63928	CE up vs CB	0.0902489	1.60273	1.60273	CE up vs KE	25.2297	14.1717	1.49788	1
212786	8129968	NM_182503 // ADAT2 /// ENST00000237283 // ADAT2 /// BX538182 // ADAT2 /// ENST00	ADAT2	NM_182503	1.8377e-05	1.08582e-05	2.02398	2.02398	CE up vs CB	0.00856981	1.28678	1.28678	CE up vs KE	48.0724	2.39127	0.132648	1
214562	8131940	NM_016447 // MPP6 /// ENST00000222644 // MPP6 /// ENST00000396475 // MPP6 /// BC	MPP6	NM_016447	0.00141688	0.00157946	2.86045	2.86045	CE up vs CB	0.00280624	2.59544	2.59544	CE up vs KE	14.2606	6.73247	1.25894	1
214854	8132266	NM_133468 // BMPER /// ENST00000297161 // BMPER /// ENST00000426693 // BMPER ///	BMPER	NM_133468	6.10964e-05	9.80266e-06	5.85153	5.85153	CE up vs CB	0.000104459	3.57678	3.57678	CE up vs KE	34.8357	10.5849	0.81027	1
219046	8136990	NM_005435 // ARHGEF5 /// ENST00000056217 // ARHGEF5 /// ENST00000344879 // ARHGE	ARHGEF5	NM_005435	0.00227416	0.00336166	2.26858	2.26858	CE up vs CB	0.00113623	2.67228	2.67228	CE up vs KE	12.337	4.57621	0.989158	1
219840	8137883	NM_032415 // CARD11 /// ENST00000396946 // CARD11 /// AF322641 // CARD11 /// ENS	CARD11	NM_032415	0.00237101	0.000443951	2.4032	2.4032	CE up vs CB	0.203195	1.23668	1.23668	CE up vs KE	12.1781	2.67994	0.586833	1
220289	8138382	AF115926 // AGR2 /// uc003str.1 // AGR2	AGR2	AF115926	0.000397264	0.00299415	2.15825	2.15825	CE up vs CB	0.819507	1.04413	1.04413	CE up vs KE	20.7095	6.50585	0.837729	1
220392	8138501	NM_018719 // CDCA7L /// NM_001127370 // CDCA7L /// NM_001127371 // CDCA7L /// EN	CDCA7L	NM_018719	0.00234487	0.0299482	2.00985	2.00985	CE up vs CB	0.234293	1.40606	1.40606	CE up vs KE	12.2202	8.03315	1.75298	1
220683	8138840	NM_017946 // FKBP14 /// ENST00000222803 // FKBP14 /// AY358643 // FKBP14 /// ENS	FKBP14	NM_017946	6.29703e-05	7.80596e-05	2.05633	2.05633	CE up vs CB	0.0502766	0.798454	-1.25242	CE down vs KE	34.5514	3.09248	0.238677	1
222559	8140982	NM_152703 // SAMD9L /// ENST00000318238 // SAMD9L /// ENST00000411955 // SAMD9L	SAMD9L	NM_152703	0.00262468	0.00239283	2.0572	2.0572	CE up vs CB	0.00114325	2.25965	2.25965	CE up vs KE	11.7976	3.01609	0.681743	1
222583	8141008	NM_001742 // CALCR /// ENST00000359558 // CALCR /// ENST00000426151 // CALCR ///	CALCR	NM_001742	1.41101e-06	3.31335e-06	2.98563	2.98563	CE up vs CB	0.00973042	0.722052	-1.38494	CE down vs KE	93.9717	8.20048	0.232708	1
222592	8141018	NM_006528 // TFPI2 /// ENST00000222543 // TFPI2 /// AK129833 // TFPI2 /// ENST00	TFPI2	NM_006528	0.00288583	0.0113424	2.68538	2.68538	CE up vs CB	0.0514514	0.501123	-1.99552	CE down vs KE	11.4511	9.7826	2.27812	1
223529	8142065	NM_019042 // PUS7 /// ENST00000356362 // PUS7 /// BC011396 // PUS7	PUS7	NM_019042	0.000196443	3.81713e-05	2.12779	2.12779	CE up vs CB	0.147564	1.16012	1.16012	CE up vs KE	25.2664	2.031	0.214356	1
225816	8144651	NM_002052 // GATA4 /// ENST00000335135 // GATA4 /// ENST00000382335 // GATA4 ///	GATA4	NM_002052	5.6899e-06	3.45107e-06	19.2745	19.2745	CE up vs CB	0.106221	1.61255	1.61255	CE up vs KE	65.4479	42.2426	1.72117	1
225826	8144663	NM_145043 // NEIL2 /// NM_001135746 // NEIL2 /// NM_001135747 // NEIL2 /// ENST0	NEIL2	NM_145043	1.13353e-05	2.15332e-05	2.5251	2.5251	CE up vs CB	0.00243757	1.57965	1.57965	CE up vs KE	54.6228	5.64553	0.275613	1
226878	8145833	NM_025069 // ZNF703 /// ENST00000331569 // ZNF703 /// BC032534 // ZNF703 /// ENS	ZNF703	NM_025069	8.0955e-05	0.000123315	2.44989	2.44989	CE up vs CB	0.0196452	1.45808	1.45808	CE up vs KE	32.2683	5.08246	0.420017	1
227170	8146152	NM_178819 // AGPAT6 /// ENST00000396987 // AGPAT6 /// AF406612 // AGPAT6	AGPAT6	NM_178819	0.000173793	5.61005e-05	2.3199	2.3199	CE up vs CB	0.00201085	1.63203	1.63203	CE up vs KE	26.1442	2.90553	0.296359	1
227628	8146686	NM_015169 // RRS1 /// ENST00000320270 // RRS1 /// BC013043 // RRS1	RRS1	NM_015169	1.29752e-07	6.11036e-08	2.16672	2.16672	CE up vs CB	0.245506	1.05234	1.05234	CE up vs KE	173.046	2.68602	0.0413921	1
227648	8146708	NM_152765 // C8orf46 /// BC028400 // C8orf46 /// AK294261 // C8orf46 /// ENST000	C8orf46	NM_152765	5.59448e-06	2.50617e-06	5.22363	5.22363	CE up vs CB	0.00502252	1.71341	1.71341	CE up vs KE	65.7376	12.1751	0.493888	1
227667	8146730	NM_013257 // SGK3 /// NM_170709 // SGK3 /// NM_001033578 // SGK3 /// ENST0000026	SGK3	NM_013257	8.30418e-07	7.68788e-07	4.58841	4.58841	CE up vs CB	0.0270615	1.34972	1.34972	CE up vs KE	107.706	12.4431	0.308078	1
227713	8146779	NM_001077204 // CSPP1 /// NM_024790 // CSPP1 /// ENST00000262210 // CSPP1 /// EN	CSPP1	NM_001077204	0.00303395	0.0020999	2.28456	2.28456	CE up vs CB	0.380934	0.842312	-1.18721	CE down vs KE	11.2715	3.61607	0.855508	1
228024	8147135	NM_000067 // CA2 /// ENST00000285379 // CA2 /// BC011949 // CA2	CA2	NM_000067	4.4534e-06	1.22721e-05	2.15104	2.15104	CE up vs CB	0.00168732	0.688889	-1.45161	CE down vs KE	69.7682	4.23308	0.161796	1
228860	8148067	NM_022783 // DEPDC6 /// ENST00000286234 // DEPDC6 /// BC024746 // DEPDC6	DEPDC6	NM_022783	1.33307e-07	4.27549e-07	2.2424	2.2424	CE up vs CB	0.000469234	1.36273	1.36273	CE up vs KE	171.861	4.79224	0.0743586	1
229085	8148320	NM_002467 // MYC /// ENST00000377970 // MYC /// BC000141 // MYC /// ENST00000259	MYC	NM_002467	6.23091e-08	1.12116e-07	2.97274	2.97274	CE up vs CB	0.0761458	1.13451	1.13451	CE up vs KE	208.466	7.50143	0.0959574	1
229891	8149252	NM_001080826 // PRAGMIN /// ENST00000330777 // PRAGMIN	PRAGMIN	NM_001080826	0.000966611	0.000530402	2.55939	2.55939	CE up vs CB	0.669871	0.928027	-1.07756	CE down vs KE	15.9898	4.26805	0.711795	1
230016	8149414	NM_182643 // DLC1 /// NM_006094 // DLC1 /// ENST00000276297 // DLC1 /// ENST0000	DLC1	NM_182643	0.000426051	8.07429e-05	2.62305	2.62305	CE up vs CB	0.0837862	1.29615	1.29615	CE up vs KE	20.2991	3.2821	0.431166	1
230298	8149723	NM_004430 // EGR3 /// ENST00000317216 // EGR3 /// AK292464 // EGR3	EGR3	NM_004430	0.000230119	0.000117052	2.11556	2.11556	CE up vs CB	0.0512196	1.2796	1.2796	CE up vs KE	24.1716	2.62294	0.289369	1
231000	8150511	NM_000930 // PLAT /// NM_033011 // PLAT /// ENST00000220809 // PLAT /// ENST0000	PLAT	NM_000930	6.31574e-09	1.12621e-08	8.22267	8.22267	CE up vs CB	0.0154818	0.760178	-1.31548	CE down vs KE	371.726	27.8786	0.199994	1
231530	8151108	NM_001080416 // MYBL1 /// NM_001144755 // MYBL1 /// ENST00000399555 // MYBL1 ///	MYBL1	NM_001080416	3.05386e-09	7.83987e-09	3.71545	3.71545	CE up vs CB	0.00643081	0.823071	-1.21496	CE down vs KE	446.361	11.8531	0.0708134	1
231808	8151427	NM_020647 // JPH1 /// ENST00000342232 // JPH1 /// BC140875 // JPH1	JPH1	NM_020647	3.77265e-05	2.9067e-05	2.74896	2.74896	CE up vs CB	0.000172377	2.19599	2.19599	CE up vs KE	39.6756	5.30581	0.356613	1
232130	8151819	NM_005261 // GEM /// NM_181702 // GEM /// ENST00000297596 // GEM /// ENST0000039	GEM	NM_005261	2.57647e-06	1.0976e-05	2.03116	2.03116	CE up vs CB	0.000818665	0.682708	-1.46475	CE down vs KE	80.4284	4.05282	0.134374	1
232604	8152359	NM_001099744 // GOLSYN /// NM_001099751 // GOLSYN /// NM_001099753 // GOLSYN ///	GOLSYN	NM_001099744	2.16921e-05	5.65441e-05	3.09658	3.09658	CE up vs CB	0.0689662	1.36009	1.36009	CE up vs KE	46.0002	9.2432	0.535835	1
233810	8153677	NM_015201 // BOP1 /// ENST00000307404 // BOP1 /// AK293719 // BOP1	BOP1	NM_015201	0.000519611	0.00289345	2.12656	2.12656	CE up vs CB	0.140468	1.33926	1.33926	CE up vs KE	19.1726	5.72502	0.796279	1
234241	8154148	NM_004170 // SLC1A1 /// ENST00000262352 // SLC1A1 /// BC033040 // SLC1A1 /// ENS	SLC1A1	NM_004170	0.00193062	0.00231169	2.6618	2.6618	CE up vs CB	0.00240977	2.64347	2.64347	CE up vs KE	12.9773	6.03963	1.24107	1
234291	8154203	NM_004972 // JAK2 /// ENST00000381652 // JAK2 /// AF058925 // JAK2	JAK2	NM_004972	5.33974e-06	3.40946e-05	2.52331	2.52331	CE up vs CB	0.0159723	0.711565	-1.40535	CE down vs KE	66.5425	7.79003	0.312183	1
234791	8154783	NM_014471 // SPINK4 /// ENST00000379721 // SPINK4 /// AF048700 // SPINK4 /// BC1	SPINK4	NM_014471	0.00019961	0.000284981	2.20411	2.20411	CE up vs CB	0.00263099	1.7424	1.7424	CE up vs KE	25.1537	3.93637	0.417313	1
234830	8154825	ENST00000290943 // ANKRD18B	ANKRD18B	ENST00000290943	0.000618511	0.000558418	3.28205	3.28205	CE up vs CB	0.196256	0.738319	-1.35443	CE down vs KE	18.2289	7.90585	1.15653	1
235616	8155737	NM_004816 // FAM189A2 /// NM_001127608 // FAM189A2 /// ENST00000455972 // FAM189	FAM189A2	NM_004816	3.90472e-05	6.19981e-05	2.97854	2.97854	CE up vs CB	0.000862265	2.09482	2.09482	CE up vs KE	39.3105	7.55768	0.512682	1
235800	8155938	NM_001097634 // GCNT1 /// NM_001490 // GCNT1 /// NM_001097633 // GCNT1 /// NM_00	GCNT1	NM_001097634	0.00191995	0.00138406	2.27789	2.27789	CE up vs CB	0.0377466	1.53396	1.53396	CE up vs KE	12.9994	3.60592	0.739707	1
235992	8156159	NM_006180 // NTRK2 /// NM_001018064 // NTRK2 /// ENST00000376213 // NTRK2 /// EN	NTRK2	NM_006180	1.89967e-05	0.000499998	3.10302	3.10302	CE up vs CB	0.0264957	1.72821	1.72821	CE up vs KE	47.6511	18.136	1.01494	1
236832	8157107	NM_021224 // ZNF462 /// ENST00000277225 // ZNF462 /// ENST00000457913 // ZNF462	ZNF462	NM_021224	5.08083e-06	5.66816e-06	2.36812	2.36812	CE up vs CB	0.0286296	0.804441	-1.2431	CE down vs KE	67.4113	4.21297	0.166657	1
238772	8159233	NM_014279 // OLFM1 /// ENST00000252854 // OLFM1 /// BC008763 // OLFM1 /// ENST00	OLFM1	NM_014279	1.12077e-05	3.50791e-05	3.04063	3.04063	CE up vs CB	0.214189	1.19956	1.19956	CE up vs KE	54.7859	9.33171	0.454215	1
239338	8159856	NM_014878 // KIAA0020 /// ENST00000397885 // KIAA0020 /// ENST00000382032 // KIA	KIAA0020	NM_014878	0.000231598	0.000125225	2.02742	2.02742	CE up vs CB	0.662323	0.954587	-1.04757	CE down vs KE	24.1282	2.37484	0.262469	1
239695	8160248	ENST00000380715 // PSIP1	PSIP1	ENST00000380715	0.00268838	0.00129623	2.10251	2.10251	CE up vs CB	0.00937074	1.68616	1.68616	CE up vs KE	11.7092	2.59068	0.590005	1
240071	8160683	NM_022917 // NOL6 /// NM_139235 // NOL6 /// ENST00000297990 // NOL6 /// ENST0000	NOL6	NM_022917	2.03191e-06	2.72983e-07	2.19908	2.19908	CE up vs CB	0.000490393	1.32729	1.32729	CE up vs KE	85.5272	2.02307	0.0630776	1
241080	8161843	NR_023352 // C9orf95 /// NM_017881 // C9orf95 /// NM_001127603 // C9orf95 /// EN	C9orf95	NR_023352	1.7107e-05	2.39795e-05	2.13862	2.13862	CE up vs CB	0.366307	1.08738	1.08738	CE up vs KE	48.994	3.51213	0.19116	1
241749	8162602	NM_153695 // ZNF367 /// ENST00000375256 // ZNF367	ZNF367	NM_153695	0.000520379	0.000205657	2.2495	2.2495	CE up vs CB	0.0738419	1.29664	1.29664	CE up vs KE	19.1644	2.86612	0.398811	1
242619	8163562	NM_138424 // KIF12 /// ENST00000374118 // KIF12 /// BC010626 // KIF12 /// ENST00	KIF12	NM_138424	0.000706749	0.00727266	3.03351	3.03351	CE up vs CB	0.0103696	2.81466	2.81466	CE up vs KE	17.5338	15.8506	2.41068	1
243101	8164092	NM_033334 // NR6A1 /// NM_001489 // NR6A1 /// ENST00000373584 // NR6A1 /// BC030	NR6A1	NM_033334	0.000926448	0.000874269	2.64263	2.64263	CE up vs CB	0.190027	0.763219	-1.31024	CE down vs KE	16.1921	5.39971	0.889277	1
243325	8164346	NM_001035254 // FAM102A /// NM_203305 // FAM102A /// ENST00000373084 // FAM102A	FAM102A	NM_001035254	5.44653e-07	4.72519e-07	2.08595	2.08595	CE up vs CB	0.0695723	1.11113	1.11113	CE up vs KE	120.01	2.84647	0.0632497	1
243541	8164583	NM_004878 // PTGES /// ENST00000340607 // PTGES /// BC008280 // PTGES	PTGES	NM_004878	6.89314e-09	2.48583e-09	6.53151	6.53151	CE up vs CB	0.0156205	1.22312	1.22312	CE up vs KE	363.621	14.7695	0.108315	1
244062	8165153	NM_003086 // SNAPC4 /// ENST00000298532 // SNAPC4 /// AF032387 // SNAPC4	SNAPC4	NM_003086	0.000938523	0.00108626	3.82873	3.82873	CE up vs CB	0.139476	0.642256	-1.55701	CE down vs KE	16.1301	11.0017	1.81883	1
245468	8166757	NM_138780 // SYTL5 /// ENST00000297875 // SYTL5 /// ENST00000357972 // SYTL5 ///	SYTL5	NM_138780	0.00164859	0.000883325	5.05462	5.05462	CE up vs CB	0.311897	1.40514	1.40514	CE up vs KE	13.62	12.6684	2.48037	1
245629	8166938	NM_000240 // MAOA /// ENST00000338702 // MAOA /// BC044787 // MAOA	MAOA	NM_000240	0.00099727	0.00106059	2.01716	2.01716	CE up vs CB	0.151632	0.80036	-1.24944	CE down vs KE	15.8423	2.92922	0.493062	1
247068	8168634	NM_019117 // KLHL4 /// ENST00000373119 // KLHL4 /// BC161675 // KLHL4	KLHL4	NM_019117	0.000765663	0.00229566	3.15132	3.15132	CE up vs CB	0.213479	1.42307	1.42307	CE up vs KE	17.1274	10.9313	1.70195	1
247704	8169368	NM_032227 // TMEM164 /// ENST00000372073 // TMEM164 /// ENST00000372068 // TMEM1	TMEM164	NM_032227	1.15049e-05	4.18106e-05	2.40486	2.40486	CE up vs CB	0.0212542	1.36543	1.36543	CE up vs KE	54.4094	6.05757	0.296888	1
248838	8170670	NM_005629 // SLC6A8 /// NM_001142805 // SLC6A8 /// NM_001142806 // SLC6A8 /// EN	SLC6A8	NM_005629	0.000439426	0.00085906	2.1665	2.1665	CE up vs CB	0.0415233	0.695565	-1.43768	CE down vs KE	20.12	4.22323	0.55974	1
249126	8170984	NM_001363 // DKC1 /// NM_001142463 // DKC1 /// ENST00000369550 // DKC1 /// BC010	DKC1	NM_001363	3.05782e-06	1.61136e-06	2.10445	2.10445	CE up vs CB	0.0305714	1.16951	1.16951	CE up vs KE	76.9338	2.5706	0.0891017	1
251201	8173318	NM_002547 // OPHN1 /// ENST00000355520 // OPHN1 /// AJ001189 // OPHN1	OPHN1	NM_002547	0.00246591	0.000617888	2.20144	2.20144	CE up vs CB	0.0545412	1.38622	1.38622	CE up vs KE	12.03	2.37313	0.526047	1
251383	8173525	NM_004143 // CITED1 /// NM_001144885 // CITED1 /// NM_001144886 // CITED1 /// NM	CITED1	NM_004143	0.00338833	0.00349221	2.02793	2.02793	CE up vs CB	0.00493861	1.94301	1.94301	CE up vs KE	10.883	3.048	0.746854	1
251895	8174098	NM_014782 // ARMCX2 /// ENST00000330154 // ARMCX2 /// ENST00000328766 // ARMCX2	ARMCX2	NM_014782	0.00138166	0.00131733	2.75559	2.75559	CE up vs CB	0.0750381	1.53716	1.53716	CE up vs KE	14.3694	5.94612	1.10348	1
252764	8175095	NM_017666 // ZNF280C /// ENST00000370978 // ZNF280C /// BC051728 // ZNF280C ///	ZNF280C	NM_017666	0.00265692	0.00122885	3.76333	3.76333	CE up vs CB	0.813769	0.935981	-1.0684	CE down vs KE	11.7525	8.12829	1.84432	1
253036	8175415	ENST00000370622 // ARHGEF6	ARHGEF6	ENST00000370622	0.000565195	0.000130198	2.12116	2.12116	CE up vs CB	0.000309687	1.93935	1.93935	CE up vs KE	18.712	2.10833	0.30046	1
253170	8175575	NM_173078 // SLITRK4 /// ENST00000356928 // SLITRK4 /// ENST00000338017 // SLITR	SLITRK4	NM_173078	1.9314e-05	4.31213e-05	2.2775	2.2775	CE up vs CB	0.0174494	0.735915	-1.35885	CE down vs KE	47.442	4.68713	0.263459	1
255981	8178818				4.40526e-05	0.000208003	2.05561	2.05561	CE up vs CB	0.00349029	0.631274	-1.5841	CE down vs KE	38.0552	4.5111	0.316109	1
255994	8178832				0.000781798	0.0013694	5.12073	5.12073	CE up vs CB	0.228432	0.641131	-1.55974	CE down vs KE	17.0229	18.5219	2.90148	1
257053	8180014				4.40526e-05	0.000208003	2.05561	2.05561	CE up vs CB	0.00349029	0.631274	-1.5841	CE down vs KE	38.0552	4.5111	0.316109	1
257055	8180016				0.000171034	0.00058218	2.7111	2.7111	CE up vs CB	0.0130066	0.561093	-1.78224	CE down vs KE	26.2608	8.12457	0.825012	1
257064	8180028				0.000781798	0.0013694	5.12073	5.12073	CE up vs CB	0.228432	0.641131	-1.55974	CE down vs KE	17.0229	18.5219	2.90148	1
